# Supplementary material for: Asymmetric addition of an N-methyl C(sp3)–H bond to cyclic alkenes enabled by an iridium/phosphine–olefin catalyst
Source: Royal Society of Chemistry journal article supplement (doi:10.1039/d2cc04642c), 2022-01-01

## Supplementary Information

### Asymmetric addition of *N*-methyl C(sp<sup>3</sup>)–H bond to cyclic alkenes enabled by an iridium/phosphine-olefin catalyst

Kana Sakamoto and Takahiro Nishimura\*

Department of Chemistry, Graduate School of Science, Osaka Metropolitan University, Sumiyoshi,  
Osaka 558-8585, Japan. E-mail: tnishi@omu.ac.jp

#### Contents of Supplementary Information:

|     |                                                                    |      |
|-----|--------------------------------------------------------------------|------|
| 1.  | General information                                                | S-2  |
| 2.  | Materials                                                          | S-2  |
| 3.  | Preparation of substrates <b>1</b> and <b>2</b>                    | S-2  |
| 4.  | Characterization of substrates                                     | S-4  |
| 5.  | General procedure for Table 1 and Scheme 2                         | S-6  |
| 6.  | General procedure for Scheme 3                                     | S-6  |
| 7.  | Unsuccessful substrates for Scheme 3                               | S-7  |
| 8.  | Procedure for Scheme 4                                             | S-7  |
| 9.  | Procedure for Scheme 5a                                            | S-8  |
| 10. | Procedure for Scheme 5b                                            | S-8  |
| 11. | Procedure for Scheme 5c and 5d                                     | S-9  |
| 12. | References                                                         | S-10 |
| 13. | Characterization of the products                                   | S-11 |
| 14. | <sup>1</sup> H, <sup>13</sup> C NMR spectra and chiral HPLC charts | S-20 |

## 1. General information

All anaerobic and moisture-sensitive manipulations were carried out with standard Schlenk techniques under pre-dried nitrogen. NMR spectra were recorded on either a JEOL JNM ECZ-400 spectrometer (400 MHz for  $^1\text{H}$ , 100 MHz for  $^{13}\text{C}$ ) or a Bruker Avance III HD 400 spectrometer (400 MHz for  $^1\text{H}$ , 100 MHz for  $^{13}\text{C}$ ). Chemical shifts are reported in  $\delta$  (ppm) referenced to the residual peaks of  $\text{CDCl}_3$  ( $\delta$  7.26) for  $^1\text{H}$  NMR, and  $\text{CDCl}_3$  ( $\delta$  77.00) for  $^{13}\text{C}$  NMR. The following abbreviations are used; s, singlet; d, doublet; t, triplet; q, quartet; quint, quintet; sext, sextet; sept, septet; m, multiplet; br, broad. Optical rotations were measured on a JASCO P-2200 polarimeter. High-resolution mass spectra were obtained with JEOL AccuTOF LC-plus 4G spectrometer. Flash column chromatography was performed with Silica Gel 60 N (Wako). Preparative thin-layer chromatography was performed with Wakogel® B-5F (Wako).

## 2. Materials

Dehydrated solvents were purchased and used after being deoxygenated by bubbling  $\text{N}_2$ .  $[\text{IrCl}(\text{coe})_2]_2$ <sup>1</sup> and  $\text{NaBAr}^{\text{F}}_4$  [ $\text{Ar}^{\text{F}} = 3,5\text{-(CF}_3)_2\text{C}_6\text{H}_3$ ]<sup>2</sup> were prepared according to the reported procedures.

## 3. Preparation of substrates 1 and 2

Compounds **1a** (CAS: 1036584-14-1),<sup>3</sup> **1b** (CAS: 468718-67-4),<sup>3</sup> **1c** (CAS: 103976-61-0),<sup>3</sup> **1d** (CAS: 1251349-49-1),<sup>3</sup> **1e** (CAS: 156267-13-9),<sup>3</sup> **1g** (937602-15-8),<sup>3</sup> **1a-d**,<sup>4</sup> **2b** (CAS: 78383-19-4),<sup>5</sup> **2c** (CAS: 2576641-39-7),<sup>5</sup> **2d** (CAS: 2576641-40-0),<sup>5</sup> **2e** (CAS: 2576641-41-1),<sup>5</sup> **2f**,<sup>5</sup> **2g** (CAS: 2576641-44-4),<sup>5</sup> **2h**,<sup>5</sup> **2i**,<sup>5</sup> **2m** (CAS: 4453-90-1),<sup>6</sup> **2n** (CAS: 75715-21-8),<sup>7</sup> **2q** (CAS: 19345-99-4),<sup>8</sup> and **2r** (CAS: 912329-24-9)<sup>5</sup> were prepared according to the reported procedures. Compounds **2j**, **2k**, and **2o** (CAS: 62791-44-0) were prepared as shown below. Other chemicals were purchased from commercial suppliers and used as received.

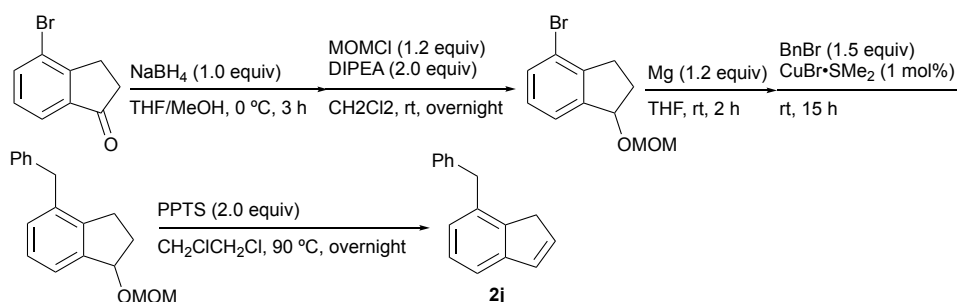

To a solution of 4-bromoindanone (2.1 g, 10 mmol) in THF (20 mL) and MeOH (20 mL) was added  $\text{NaBH}_4$  (378 mg, 10 mmol, 1.0 equiv) at 0 °C and the mixture was stirred at the same temperature for 3 h. The reaction was quenched with  $\text{NH}_4\text{Cl}$  aq, and the resulting mixture was extracted with EtOAc (x3). The combined organic layer was dried over  $\text{Na}_2\text{SO}_4$ , filtered, and concentrated on a rotary evaporator. The residue was passed through a short column of silica gel with EtOAc as an eluent, and the filtrate was concentrated on a rotary evaporator. The residue was subjected to the next reaction without further purifications. The residue and *N,N*-

diisopropylethylamine (DIPEA, 5.1 mL, 30 mmol, 2.0 equiv) were dissolved in CH<sub>2</sub>Cl<sub>2</sub> (15 mL). Chloromethyl methyl ether (MOMCl, 1.8 mL, 24 mmol, 1.2 equiv) was added dropwise to the solution at 0 °C under N<sub>2</sub>, and the mixture was stirred at room temperature for 24 h. The reaction was quenched with H<sub>2</sub>O, and the aqueous layer was extracted with CH<sub>2</sub>Cl<sub>2</sub> (x3). The combined organic layer was washed with brine, dried over Na<sub>2</sub>SO<sub>4</sub>, filtered, and concentrated on a rotary evaporator. The residue was subjected to column chromatography on silica gel with hexane/EtOAc (20:1) to give 4-bromo-2,3-dihydro-1-(methoxymethoxy)-1*H*-indene (2.52 g, 80% yield). To a suspension of Mg turnings (280 mg, 11.5 mmol, 1.2 equiv) in a small amount of THF was added 4-bromo-2,3-dihydro-1-(methoxymethoxy)-1*H*-indene (2.47 g, 9.6 mmol) in THF (10 mL) dropwise under N<sub>2</sub>, and the resulting solution was stirred at room temperature for 2 h. BnBr (1.70 mL, 14.4 mmol, 1.5 equiv) and CuBr•SMe<sub>2</sub> (19.7 mg, 0.096 mmol, 1 mol%) were added to the mixture at 0 °C, and the mixture was stirred at room temperature for 15 h. The reaction was quenched with NH<sub>4</sub>Cl aq, and the aqueous layer was extracted with EtOAc (x3). The combined organic layer was washed with brine, dried over Na<sub>2</sub>SO<sub>4</sub>, filtered, and concentrated on a rotary evaporator. The residue was subjected to column chromatography on silica gel with hexane/EtOAc (20:1) to give 4-benzyl-2,3-dihydro-1-(methoxymethoxy)-1*H*-indene (1.24 g, 4.6 mmol, 48% yield). A mixture of 4-benzyl-2,3-dihydro-1-(methoxymethoxy)-1*H*-indene (1.07 g, 4.0 mmol) and PPTS (2.01 g, 8.0 mmol, 2.0 equiv) in 1,2-dichloroethane (20 mL) was heated to 90 °C and stirred overnight. The reaction was quenched with H<sub>2</sub>O, and the aqueous layer was extracted with EtOAc (x3). The combined organic layer was washed with brine, dried over Na<sub>2</sub>SO<sub>4</sub>, filtered, and concentrated on a rotary evaporator. The residue was subjected to column chromatography on silica gel with hexane to give 7-benzylindene (**2j**) (685 mg, 3.3 mmol, 83% yield).

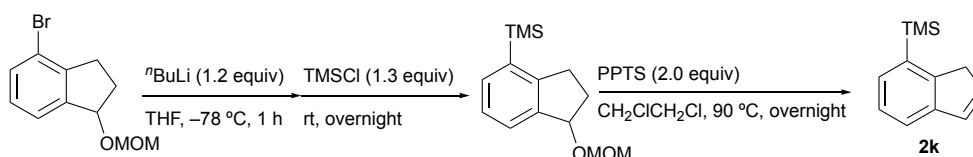

To a solution of 4-bromo-2,3-dihydro-1-(methoxymethoxy)-1*H*-indene (1.29 g, 5 mmol) in THF was added dropwise BuLi (15 w/w% hexane solution, 3.8 mL, 6 mmol, 1.2 equiv) at -78 °C under N<sub>2</sub>, and the resulting mixture was stirred at the same temperature for 1 h. Chlorotrimethylsilane (TMSCl, 0.79 mL, 7.0 mmol, 1.3 equiv) was added dropwise to the mixture at -78 °C, and the mixture was stirred overnight. The reaction was quenched with H<sub>2</sub>O, and the aqueous layer was extracted with EtOAc (x3). The combined organic layer was washed with brine, dried over Na<sub>2</sub>SO<sub>4</sub>, filtered, and concentrated on a rotary evaporator. The residue was subjected to column chromatography on silica gel with hexane/EtOAc (20:1) to give 2,3-dihydro-1-(methoxymethoxy)-4-trimethylsilyl-1*H*-indene (554 mg, 2.2 mmol, 55% yield). The mixture of 2,3-dihydro-1-(methoxymethoxy)-4-trimethylsilyl-1*H*-indene (554 mg, 2.2 mmol) and pyridinium *p*-toluene sulfonate (PPTS, 1.10 g, 4.4 mmol, 2.0 equiv) in 1,2-dichloroethane (10 mL) was heated to 90 °C and stirred overnight. The reaction was quenched with H<sub>2</sub>O, and the aqueous layer was extracted with EtOAc (x3). The combined organic layer was washed with brine, dried over Na<sub>2</sub>SO<sub>4</sub>, filtered, and concentrated on a

rotary evaporator. The residue was subjected to column chromatography on silica gel with hexane to give 7-benzylindene (**2j**, 160 mg, 0.85 mmol, 39% yield).

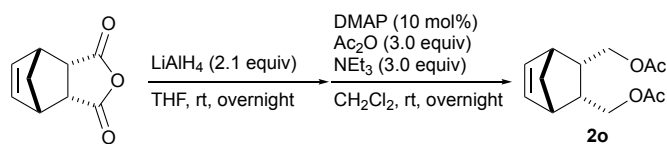

Carbic anhydride was prepared according to the reported procedure.<sup>9</sup> To a solution of LiAlH<sub>4</sub> (797 mg, 21 mmol, 2.1 equiv) in THF (20 mL) was added carbic anhydride (1.64 g, 10 mmol) in portions at 0 °C, and the resulting mixture was stirred at room temperature overnight. The reaction was quenched by adding H<sub>2</sub>O (0.8 mL) slowly, 15% NaOH (0.8 mL), and then, H<sub>2</sub>O (2.4 mL) at 0 °C. The mixture was stirred at room temperature for 2 h. The resulting precipitate was removed through a pad of celite eluted with Et<sub>2</sub>O. The filtrate was concentrated on a rotary evaporator and the residue was used for the next reaction without further purification. To a solution of the residue, 4-dimthylaminopyridine (DMAP, 12.2 mg, 0.10 mmol, 10 mol%), and NEt<sub>3</sub> (4.2 mL, 30 mmol, 3.0 equiv) in CH<sub>2</sub>Cl<sub>2</sub> (50 mL) was added Ac<sub>2</sub>O (2.8 mL, 30 mmol, 3.0 equiv) dropwise at 0 °C. The resulting mixture was stirred overnight at room temperature. The reaction was quenched with H<sub>2</sub>O, and the aqueous layer was extracted with EtOAc (x3). The combined organic layer was washed with brine, dried over Na<sub>2</sub>SO<sub>4</sub>, filtered, and concentrated on a rotary evaporator. The residue was subjected to column chromatography on silica gel with hexane/EtOAc to give **2o** (2.19 g, 9.2 mmol, 92% yield).

#### 4. Characterization of substrates

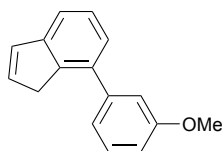

**2f**

<sup>1</sup>H NMR (CDCl<sub>3</sub>) δ 7.43 (dd, *J* = 7.4, 1.0 Hz, 1H), 7.43–7.32 (m, 2H), 7.25 (d, *J* = 7.6 Hz, 1H), 7.15 (d, *J* = 8.0 Hz, 1H), 7.11 (t, *J* = 2.0 Hz, 1H), 6.95 (td, *J* = 5.6, 2.0 Hz, 1H), 6.93 (dd, *J* = 8.0, 2.8 Hz, 1H), 6.59 (td, *J* = 5.6, 2.0 Hz, 1H), 3.86 (s, 3H), 3.50 (t, *J* = 2.0 Hz, 2H); <sup>13</sup>C NMR (CDCl<sub>3</sub>) δ 159.6, 145.4, 142.6, 141.2, 137.7, 134.4, 132.0, 129.4, 126.9, 125.1, 120.9, 120.2, 114.1, 112.5, 55.2, 39.1. HRMS (DART) *m/z*: [M + H]<sup>+</sup> Calcd for C<sub>16</sub>H<sub>15</sub>O<sub>1</sub> 223.1123; Found 223.1117.

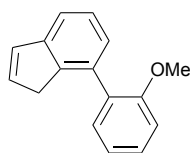

**2h**

<sup>1</sup>H NMR (CDCl<sub>3</sub>) δ 7.45 (d, *J* = 7.2 Hz, 1H), 7.46–7.29 (m, 3H), 7.19 (d, *J* = 7.6 Hz, 1H), 7.08 (d, *J* = 8.8 Hz, 1H), 7.03 (d, *J* = 8.8 Hz, 1H), 6.96 (d, *J* = 5.6 Hz, 1H), 6.58 (d, *J* = 5.6 Hz, 1H), 3.80



(s, 3H), 3.33 (s, 2H);  $^{13}\text{C}$  NMR ( $\text{CDCl}_3$ )  $\delta$  156.4, 144.6, 142.8, 134.6, 134.4, 131.9, 131.0, 129.9, 128.7, 126.3, 126.2, 120.4, 120.1, 110.8, 55.3, 38.8. HRMS (DART)  $m/z$ :  $[\text{M} + \text{H}]^+$  Calcd for  $\text{C}_{16}\text{H}_{15}\text{O}_1$  223.1123; Found 223.1123.

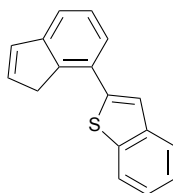

**2i**

$^1\text{H}$  NMR ( $\text{CDCl}_3$ )  $\delta$  7.72 (s, 1H), 7.62 (d,  $J = 8.0$  Hz, 2H), 7.52 (dd,  $J = 7.6, 2.0$  Hz, 1H), 7.49–7.40 (m, 3H), 7.33 (t,  $J = 7.4$  Hz, 1H), 6.92 (dt,  $J = 5.6, 2.0$  Hz, 1H), 6.60 (dt,  $J = 5.6, 2.0$  Hz, 1H), 3.48 (s, 2H);  $^{13}\text{C}$  NMR ( $\text{CDCl}_3$ )  $\delta$  145.9, 143.4, 140.6, 140.3, 139.3, 134.4, 131.8, 130.1, 127.1, 124.7, 124.4, 124.2, 123.5, 122.0, 121.4, 121.1, 40.2. HRMS (DART)  $m/z$ :  $[\text{M} + \text{H}]^+$  Calcd for  $\text{C}_{17}\text{H}_{13}\text{S}_1$  249.0738; Found 249.0732.

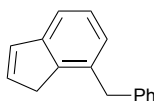

**2j**

$^1\text{H}$  NMR ( $\text{CDCl}_3$ )  $\delta$  7.33–7.21 (m, 4H), 7.24–7.15 (m, 3H), 7.01 (d,  $J = 7.6$  Hz, 1H), 6.89 (dt,  $J = 5.6, 2.0$  Hz, 1H), 6.53 (dt,  $J = 5.6, 2.0$  Hz, 1H), 4.08 (s, 2H), 3.26 (t,  $J = 2.0$  Hz, 2H);  $^{13}\text{C}$  NMR ( $\text{CDCl}_3$ )  $\delta$  144.9, 142.3, 140.2, 135.9, 133.8, 132.2, 128.8, 128.4, 126.8, 126.0, 125.7, 119.3, 39.5, 37.9. HRMS (DART)  $m/z$ :  $[\text{M} + \text{H}]^+$  Calcd for  $\text{C}_{16}\text{H}_{15}$  207.1174; Found 207.1181.

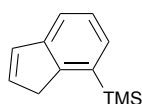

**2k**

$^1\text{H}$  NMR ( $\text{CDCl}_3$ )  $\delta$  7.42 (dd,  $J = 7.2, 1.2$  Hz, 1H), 7.35 (dd,  $J = 7.2, 1.2$  Hz, 1H), 7.27 (t,  $J = 7.2$  Hz, 1H), 6.90 (dt,  $J = 5.4, 2.0$  Hz, 1H), 6.58 (dt,  $J = 5.4, 2.0$  Hz, 1H), 3.44 (t,  $J = 2.0$  Hz, 2H), 0.35 (s, 9H);  $^{13}\text{C}$  NMR ( $\text{CDCl}_3$ )  $\delta$  144.9, 143.8, 134.0, 132.0, 130.1, 125.7, 121.9, 40.2, 18.4, -0.76. HRMS (DART)  $m/z$ :  $[\text{M} + \text{H}]^+$  Calcd for  $\text{C}_{12}\text{H}_{17}\text{Si}_1$  189.1099; Found 189.1094.

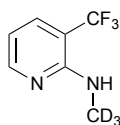

**1a- $d_3$**

$^1\text{H}$  NMR ( $\text{CDCl}_3$ )  $\delta$  7.64 (d,  $J = 8.0$  Hz, 1H), 6.60 (dd,  $J = 8.0, 4.8$  Hz, 1H), 8.29 (d,  $J = 4.8$  Hz, 1H), 4.90 (bs, 1H).;  $^{13}\text{C}$  NMR ( $\text{CDCl}_3$ )  $\delta$  155.2, 151.6, 134.8 (q,  $J_{\text{F-C}} = 5$  Hz), 124.5 (q,  $J_{\text{F-C}} = 270$

Hz), 111.0, 108.6 (q,  $J_{F-C}$  = 31 Hz), 27.8 (sept,  $J_{D-C}$  = 21 Hz). HRMS (DART)  $m/z$ :  $[M + H]^+$  Calcd for  $C_7^1H_5^2H_3F_3N_2$  180.0824; Found 180.0828.

### 5. General procedure for Table 1 and Scheme 2

A mixture of  $[IrCl(\text{coe})_2]_2$  (2.2 mg, 0.0025 mmol, 5 mol% Ir), ligand (6 mol%), and  $NaBAr^F_4$  (9.2 mg, 0.010 mmol, 10 mol%) in toluene (0.2 mL) in a Schlenk tube was stirred at room temperature for 10 min under  $N_2$ , and then, 2-(*N*-methylamino)pyridine **1** (0.10 mmol) and indene (**2a**, 34.8 mg, 0.30 mmol) were added to the mixture. The mixture was stirred at 100 °C for 18 h. After the reaction mixture was concentrated on a rotary evaporator, the residue was subjected to preparative TLC on silica gel eluted with hexane/EtOAc (10:1) to give the addition product including a small amount of impurities. The mixture was subjected again to preparative TLC on silica gel eluted with hexane/ $CH_2Cl_2$  (2:1) to give the product **3aa**.

### 6. General procedure for Scheme 3

A mixture of  $[IrCl(\text{coe})_2]_2$  (4.5 mg, 0.0050 mmol, 10 mol% Ir), **L1** (8.3 mg, 0.012 mmol, 12 mol%), and  $NaBAr^F_4$  (18.4 mg, 0.020 mmol, 20 mol%) in toluene (0.2 mL) in a Schlenk tube was stirred at room temperature for 10 min under  $N_2$ , and then, 2-(*N*-methylamino)pyridine (**1a**, 17.8 mg, 0.10 mmol) and cyclic alkenes **2** (0.12–0.30 mmol) were added to the mixture. The mixture was stirred at 100 °C for 18 h. After the reaction mixture was concentrated on a rotary evaporator, the residue was subjected to preparative TLC on silica gel eluted with hexane/EtOAc (10:1) to give the addition product including a small amount of impurities. The mixture was subjected again to preparative TLC on silica gel eluted with hexane/ $CH_2Cl_2$  (2:1) to give the product **3**.

## 7. Unsuccessful substrates for Scheme 3

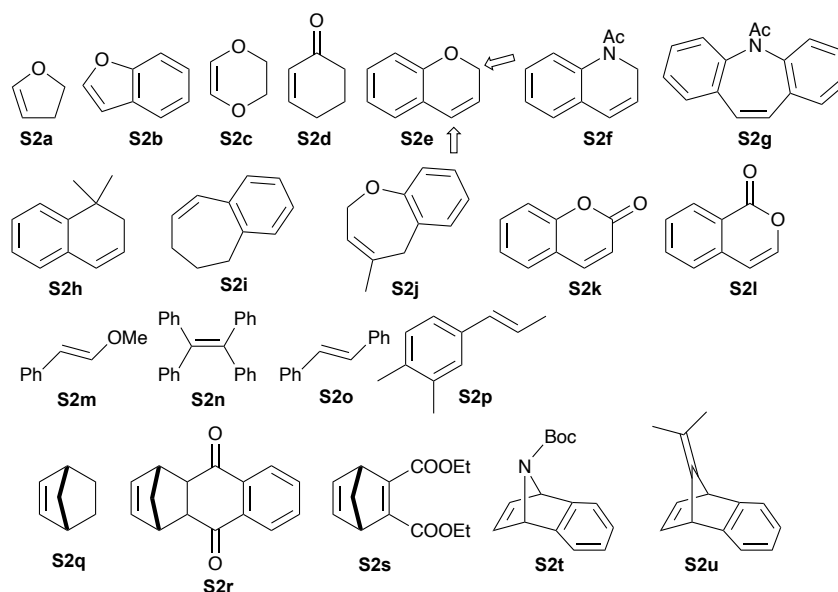

The above alkenes gave no addition product except for **S2e** and **S2q**. **S2e** underwent the addition to give two regioisomers. **S2q** gave the corresponding addition product, but we failed to determine the ee by chiral HPLC analysis.

## 8. Procedure for Scheme 4

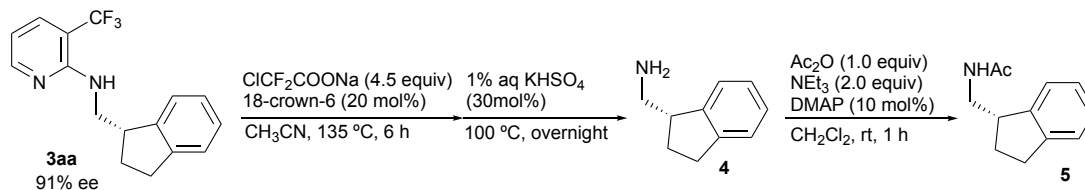

A mixture of **3aa** (87.7 mg, 0.30 mmol, 91% ee),  $\text{ClCF}_2\text{COONa}^{10}$  (68.6 mg, 0.45 mmol, 1.5 equiv), and 18-crown-6 (15.8 mg, 0.060 mmol, 20 mol%) in  $\text{CHCN}_3$  (1.2 mL, 0.25 M) was stirred at  $120\text{ }^\circ\text{C}$  for 3 h. Then,  $\text{ClCF}_2\text{COONa}$  (1.5 equiv) was added to the mixture every 3 h twice during the mixture was heated at  $120\text{ }^\circ\text{C}$ . After cooling to room temperature, 1%  $\text{KHSO}_4$  aq (0.7 mL, 30 mol%) was added to the mixture and the resulting mixture was stirred at  $100\text{ }^\circ\text{C}$  overnight. The reaction mixture was basified by the addition of 1N  $\text{NaOH}$  and the aqueous layer was extracted with  $\text{EtOAc}$  (x3). The combined organic layer was dried over  $\text{Na}_2\text{SO}_4$ , filtered, and concentrated on a rotary evaporator. The residue containing amine **4** was used for the following reactions without further purification.

To the mixture of amine **4**,  $\text{NEt}_3$  (83  $\mu\text{L}$ , 0.60 mmol, 2.0 equiv), and DMAP (3.6 mg, 0.0030 mmol, 10 mol%) in  $\text{CH}_2\text{Cl}_2$  (1.1 mL, 0.27 M) was added dropwise  $\text{Ac}_2\text{O}$  (28  $\mu\text{L}$ , 0.30 mmol, 1.0 equiv) at  $0\text{ }^\circ\text{C}$  and the mixture was stirred at rt for 1 h. The reaction was quenched by adding  $\text{H}_2\text{O}$ , and the resulting mixture was extracted with  $\text{CH}_2\text{Cl}_2$  (x3). The combined organic layer was dried over  $\text{Na}_2\text{SO}_4$ , filtered, and concentrated on a rotary evaporator. The residue was subjected to preparative TLC on silica gel eluted with hexane/Acetone (2:1) to give the acetyl amine **5** (colorless solid, 23.0 mg, 40% yield, 91% ee).

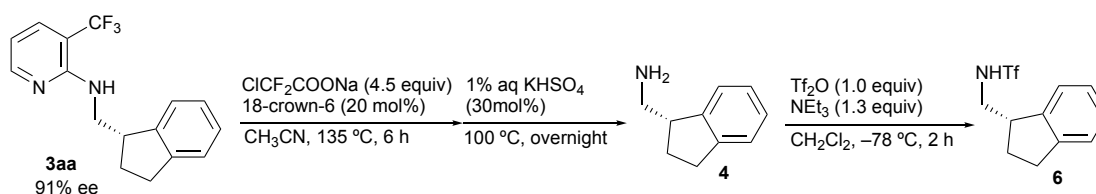

**3aa** (42.9 mg, 0.15 mmol) was transformed into **4** according to the same procedure as above. To the mixture of amine **4** and  $\text{NEt}_3$  (26  $\mu\text{L}$ , 0.18 mmol, 1.3 equiv) in  $\text{CH}_2\text{Cl}_2$  was added dropwise  $\text{Tf}_2\text{O}$  (25  $\mu\text{L}$ , 0.15 mmol, 1.0 equiv) at  $-78^\circ\text{C}$  and the mixture was stirred at  $-78^\circ\text{C}$  for 2 h. The reaction was quenched with  $\text{H}_2\text{O}$ , and the resulting mixture was extracted with  $\text{CH}_2\text{Cl}_2$  (x3). The combined organic layer was dried over  $\text{Na}_2\text{SO}_4$ , filtered, and concentrated on a rotary evaporator. The residue was subjected to preparative TLC on silica gel eluted with hexane/EtOAc (10:1) to give the trifluoromethyl sulfonyl amine **6** (colorless solid, 8.3 mg, 20% yield, 91% ee). The absolute configuration of trifluoromethylsulfonylamine **6** was determined to be *S*-(+) by the comparison of its specific rotation with that of the previously reported one.<sup>11</sup>

## 9. Procedure for Scheme 5a

A mixture of  $[\text{IrCl}(\text{coe})_2]_2$  (4.5 mg, 0.0050 mmol, 10 mol% Ir), **L1** (8.3 mg, 0.012 mmol, 12 mol%), and  $\text{NaBAR}^{\text{F}_4}$  (18.4 mg, 0.020 mmol, 20 mol%) in toluene (0.2 mL) in a Schlenk tube was stirred at room temperature for 10 min under  $\text{N}_2$ , and then, **1a-d<sub>3</sub>** (17.9 mg, 0.10 mmol) and indene **2a** (34.8 mg, 0.30 mmol) were added to the mixture. The reaction mixture was stirred at  $100^\circ\text{C}$  for 18 h. After the reaction mixture was concentrated on a rotary evaporator, the residue was subjected to preparative TLC on silica gel eluted with hexane/EtOAc (10:1) to give **3aa-d** (25.8 mg, 87% yield). The deuterium content of **3aa-d** was determined by  $^1\text{H}$  NMR.  $^1\text{H}$  NMR ( $\text{CDCl}_3$ )  $\delta$  8.28 (d,  $J = 5.0$  Hz, 1H), 7.65 (d,  $J = 7.6$  Hz, 1H), 7.38–7.10 (m, 4H), 6.62 (dd,  $J = 7.6, 5.0$  Hz, 1H), 5.00 (bs, 1H), 3.90–3.76 (m, 0.88H), 3.75–3.60 (m, 0.92H), 3.60–3.48 (m, 0.87H), 3.10–2.80 (m, 1.84H), 2.41–2.25 (m, 1H), 1.95–1.83 (m, 0.78H).

## 10. Procedure for Scheme 5b

A mixture of  $[\text{IrCl}(\text{coe})_2]_2$  (4.5 mg, 0.0050 mmol, 10 mol% Ir), **L1** (8.3 mg, 0.012 mmol, 12 mol%), and  $\text{NaBAR}^{\text{F}_4}$  (18.4 mg, 0.020 mmol, 20 mol%) in toluene (0.2 mL) in a Schlenk tube was stirred at room temperature for 10 min under  $\text{N}_2$ , and then, 2-(*N*-methylamino)pyridine (**1a**, 17.8 mg, 0.10 mmol) and 6-phenylindene (**2r**, 57.6 mg, 0.30 mmol) were added to the mixture. The mixture was stirred at  $100^\circ\text{C}$  for 18 h. After the reaction mixture was concentrated on a rotary evaporator, the residue was subjected to preparative TLC on silica gel eluted with hexane/EtOAc (10:1) to give the addition product including a small amount of impurities. The mixture was subjected again to preparative TLC on silica gel eluted with hexane/ $\text{CH}_2\text{Cl}_2$  (2:1) to give a mixture of **3ar** and **3ar'**.  $^1\text{H}$  NMR ( $\text{CDCl}_3$ )  $\delta$  8.29 (d,  $J = 4.8$  Hz, 1H, overlapped), 7.66 (d,  $J = 7.2$  Hz, 1H, overlapped), 7.63–7.54 (m, 2H, overlapped), 7.53 (s, 0.41H, minor), 7.49 (s, 0.59H, major), 7.48–7.39 (m, 3H, overlapped), 7.39–7.29 (m, 2H, overlapped), 6.63 (dd,  $J = 7.2, 4.8$  Hz, 1H, overlapped), 5.06 (bs, 1H, overlapped), 3.96–3.84 (m, 0.41H, minor), 3.78–3.86 (m, 0.59H, major), 3.78–3.64 (m, 1H, overlapped), 3.68–3.54 (m, 1H, overlapped), 3.12–2.86 (m, 2H, overlapped), 2.46–2.32 (m, 1H,

overlapped), 2.02–1.88 (m, 1H, overlapped). HRMS (ESI) m/z: [M + Na]<sup>+</sup> Calcd for C<sub>22</sub>H<sub>19</sub>F<sub>3</sub>N<sub>2</sub>Na<sub>1</sub> 391.1400; Found 391.1398.

### 11. Procedure for Scheme 5c and 5d

A mixture of [IrCl(coe)<sub>2</sub>]<sub>2</sub> (2.2 mg, 0.0025 mmol, 5 mol% Ir), **L1** (4.5 mg, 0.0060 mmol, 6 mol%), and NaBAR<sup>F</sup><sub>4</sub> (9.2 mg, 0.010 mmol, 10 mol%) in toluene (0.2 mL) in a Schlenk tube was stirred at room temperature for 10 min under N<sub>2</sub>, and then, indene **2** (0.10 mmol) were added to the mixture. The reaction mixture was stirred at 100 °C for 30 min. After the reaction mixture was concentrated on a rotary evaporator, the residue was subjected to preparative TLC on silica gel eluted with hexane/EtOAc (10:1) to give indene **2** and **2'**. The ratio of **2** to **2'** was determined by <sup>1</sup>H NMR. Scheme 5c: <sup>1</sup>H NMR (CDCl<sub>3</sub>) δ 7.72 (s, 0.67H, **2r**), 7.65–7.59 (m, 2.33H, **2r+2r'**), 7.56–7.49 (m, 1H, overlapped), 7.49–7.40 (m, 3H, overlapped), 7.36–7.28 (m, 1H, overlapped), 6.96–6.89 (m, 1H, overlapped), 6.64–6.57 (m, 1H, overlapped), 3.47 (s, 1.33H, **2r**), 3.45 (s, 0.67H, **2r'**). Scheme 5d: <sup>1</sup>H NMR (CDCl<sub>3</sub>) δ 7.50–7.19 (m, 7H, overlapped), 7.10–7.04 (m, 0.37H, **2c'**), 6.98–6.89 (m, 0.63H, **2c**), 6.62–6.55 (m, 1H, overlapped), 3.52–3.48 (m, 2H, overlapped), 2.42 (s, 3H, overlapped).

## 12. References

1. R. Uson, L. A. Oro and J. A. Cabeza, *Inorg. Synth.*, 1985, **23**, 126.
2. M. Brookhart, B. Grant and A. F. Volpe, *Organometallics*, 1992, **11**, 3920.
3. D. Yamauchi, I. Nakamura and T. Nishimura, *Chem. Commun.*, 2021, **57**, 11787.
4. K. Tanaka, H. Hattori, R. Yabe and T. Nishimura, *Chem. Commun.*, 2022, **58**, 5371.
5. M. Umeda, H. Noguchi and T. Nishimura, *Org. Lett.*, 2020, **22**, 9597.
6. B.-Y. Wang, D. A. Turner, T. Zujovic, C. M. Hadad and J. D. Badjic, *Chem. Eur. J.*, 2011, **17**, 8870.
7. (a) H. Gybäck, J. Malmstöm and T. E. Gitte, *Patent* WO2012/87229 A1, 2012; (b) K. Mori, Y. Ichikawa, M. Kobayashi, S. Shibata, M. Yamanaka and T. Akiyama, *J. Am. Chem. Soc.*, 2013, **135**, 3964.
8. L. Zhao, R. I. Kaiser, W. Lu, M. Ahmed, A. D. Oleinikov, V. N. Azyazov, A. M. Mebel, A. H. Howlader and S. F. Wnuka *Phys. Chem. Chem. Phys.*, 2020, **22**, 15381.
9. D. Birney, T. K. Lim, J. H. P. Koh, B. R. Pool and J. M. White, *J. Am. Chem. Soc.*, 2002, **124**, 5091.
10. M. Ando, T. Wada and N. Sato, *Org. Lett.*, 2006, **8**, 3805.
11. Z. Zhang, J. Wang, J. Li, F. Yang, G. Liu, W. Tang, W. He, J.-J., Fu, Y.-H. Shen, A. Li and W.-D. Zhang, *J. Am. Chem. Soc.*, 2017, **139**, 5558.

### 13. Characterization of the products

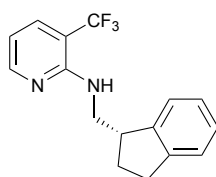

**3aa**

**Compound 3aa** (Scheme 2: colorless solid, 25.8 mg, 88% yield, 91% ee). The ee was measured by HPLC (Chiralcel OJ-H, hexane/2-propanol = 200:1, flow 0.5 mL/min, 254 nm,  $t_1$  = 16.6 min (minor),  $t_2$  = 18.4 min (major)):  $[\alpha]_D^{25} -36$  ( $c$  0.95,  $\text{CHCl}_3$ ) for 91% ee (*S*).  $^1\text{H NMR}$  ( $\text{CDCl}_3$ )  $\delta$  8.27 (d,  $J$  = 5.0 Hz, 1H), 7.64 (d,  $J$  = 6.8 Hz, 1H), 7.31–7.23 (m, 2H), 7.23–7.14 (m, 2H), 6.61 (dd,  $J$  = 6.8, 5.2 Hz, 1H), 4.99 (bs, 1H), 3.85–3.73 (m, 1H), 3.66 (ddd,  $J$  = 12.6, 7.2, 4.8 Hz, 1H), 3.59–3.48 (m, 1H), 3.00 (ddd,  $J$  = 14.8, 8.0, 6.8 Hz, 1H), 2.89 (ddd,  $J$  = 14.8, 8.4, 6.4 Hz, 1H), 2.49–2.26 (m, 1H), 1.96–1.84 (m, 1H);  $^{13}\text{C NMR}$  ( $\text{CDCl}_3$ )  $\delta$  154.7, 151.7, 144.5, 144.3, 134.9 (q,  $J_{F-C}$  = 5 Hz), 126.9, 126.2, 124.7, 124.4 (q,  $J_{F-C}$  = 270 Hz), 124.1, 111.2, 108.5 (q,  $J_{F-C}$  = 32 Hz), 45.3, 44.3, 31.2, 29.9. HRMS (DART)  $m/z$ :  $[\text{M} + \text{H}]^+$  Calcd for  $\text{C}_{16}\text{H}_{16}\text{F}_3\text{N}_2$  293.1266; Found 293.1258.

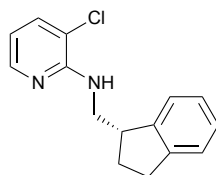

**3ba**

**Compound 3ba** (Scheme 2: colorless oil, 12.1 mg, 47% yield, 88% ee). The ee was measured by HPLC (Chiralcel OD-H, hexane/2-propanol = 200:1, flow 0.5 mL/min, 254 nm,  $t_1$  = 27.2 min (major),  $t_2$  = 34.4 min (minor)):  $[\alpha]_D^{25} -21$  ( $c$  0.51,  $\text{CHCl}_3$ ) for 88% ee (*S*).  $^1\text{H NMR}$  ( $\text{CDCl}_3$ )  $\delta$  8.04 (dd,  $J$  = 5.2, 2.0 Hz, 1H), 7.44 (dd,  $J$  = 7.6, 2.0 Hz, 1H), 7.36–7.20 (m, 2H), 7.26–7.10 (m, 2H), 6.52 (dd,  $J$  = 7.6, 5.2 Hz, 1H), 5.10 (bs, 1H), 3.82–3.69 (m, 1H), 3.64 (ddd,  $J$  = 12.8, 6.8, 5.6 Hz, 1H), 3.59–3.47 (m, 1H), 3.08–2.94 (m, 1H), 2.89 (ddd,  $J$  = 15.4, 8.8, 6.4 Hz, 1H), 2.40–2.26 (m, 1H), 1.98–1.86 (m, 1H);  $^{13}\text{C NMR}$  ( $\text{CDCl}_3$ )  $\delta$  154.1, 146.0, 144.7, 144.4, 135.9, 126.9, 126.2, 124.7, 124.1, 115.4, 112.7, 45.3, 44.5, 31.2, 29.9. HRMS (DART)  $m/z$ :  $[\text{M} + \text{H}]^+$  Calcd for  $\text{C}_{15}\text{H}_{16}\text{Cl}_1\text{N}_2$  259.1002; Found 259.0990.

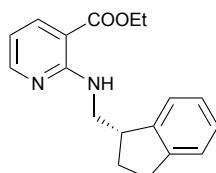

**3ca**

**Compound 3ca** (Scheme 2: colorless oil, 7.0 mg, 24% yield, 87% ee). The ee was measured by HPLC (Chiralcel OD-H, hexane/2-propanol = 200:1, flow 0.5 mL/min, 254 nm,  $t_1$  = 22.1 min (minor),  $t_2$  = 23.9 min (major)):  $[\alpha]_D^{25} -37$  ( $c$  0.35,  $\text{CHCl}_3$ ) for 87% ee (*S*).  $^1\text{H NMR}$  ( $\text{CDCl}_3$ )  $\delta$  8.28

(dd,  $J = 5.2, 2.0$  Hz, 1H), 8.16 (bs, 1H), 8.13 (dd,  $J = 7.6, 2.0$  Hz, 1H), 7.38–7.30 (m, 1H), 7.24 (d,  $J = 4.0$  Hz, 1H), 7.22–7.13 (m, 2H), 6.52 (dd,  $J = 7.6, 5.2$  Hz, 1H), 4.32 (q,  $J = 7.2$  Hz, 2H), 3.95–3.83 (m, 1H), 3.60 (ddd,  $J = 12.6, 7.6, 5.2$  Hz, 1H), 3.59–3.47 (m, 1H), 3.01 (ddd,  $J = 16.2, 8.8, 6.0$  Hz, 1H), 2.95–2.81 (m, 1H), 2.42–2.28 (m, 1H), 1.98–1.85 (m, 1H), 1.37 (t,  $J = 7.2$  Hz, 3H);  $^{13}\text{C}$  NMR ( $\text{CDCl}_3$ )  $\delta$  167.5, 158.8, 153.5, 144.9, 144.3, 140.0, 126.8, 126.2, 124.6, 124.2, 110.8, 106.1, 60.7, 45.2, 44.7, 31.2, 30.3, 14.3. HRMS (DART)  $m/z$ :  $[\text{M} + \text{H}]^+$  Calcd for  $\text{C}_{18}\text{H}_{21}\text{N}_2\text{O}_2$  297.1603; Found 297.1590.

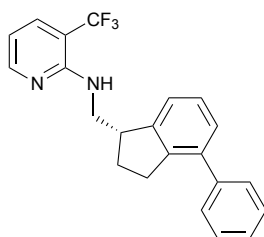

**3ab**

**Compound 3ab** (Scheme 3: colorless oil, 23.9 mg, 65% yield, 88% ee). The ee was measured by HPLC (Chiralcel OD-H, hexane/2-propanol = 200:1, flow 0.5 mL/min, 254 nm,  $t_1 = 17.8$  min (major),  $t_2 = 20.5$  min (minor)):  $[\alpha]_D^{25} -77$  ( $c$  1.13,  $\text{CHCl}_3$ ) for 88% ee (*S*).  $^1\text{H}$  NMR ( $\text{CDCl}_3$ )  $\delta$  8.30 (d,  $J = 5.0$  Hz, 1H), 7.66 (d,  $J = 7.2$  Hz, 1H), 7.48–7.40 (m, 4H), 7.32–7.38 (m, 1H), 7.31–7.24 (m, 3H), 6.63 (dd,  $J = 7.2, 5.0$  Hz, 1H), 5.05 (bs, 1H), 3.92–3.81 (m, 1H), 3.71 (ddd,  $J = 12.6, 7.2, 5.2$  Hz, 1H), 3.66–3.54 (m, 1H), 3.07 (ddd,  $J = 16.0, 8.4, 6.4$  Hz, 1H), 2.93 (ddd,  $J = 16.0, 8.8, 6.0$  Hz, 1H), 2.38–2.23 (m, 1H), 1.96–1.82 (m, 1H);  $^{13}\text{C}$  NMR ( $\text{CDCl}_3$ )  $\delta$  154.7, 151.7, 145.3, 142.0, 141.2, 138.6, 134.9 (q,  $J_{F-C} = 5$  Hz), 128.5, 128.2, 127.5, 126.9, 124.5 (q,  $J_{F-C} = 270$  Hz), 123.1, 111.3, 108.5 (q,  $J_{F-C} = 32$  Hz), 45.3, 44.6, 31.1, 30.2. HRMS (DART)  $m/z$ :  $[\text{M} + \text{H}]^+$  Calcd for  $\text{C}_{22}\text{H}_{20}\text{F}_3\text{N}_2$  369.1579; Found 369.1592.

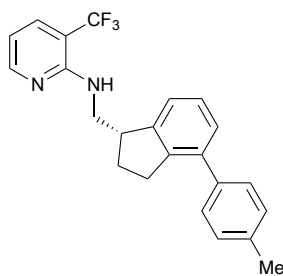

**3ac**

**Compound 3ac** (Scheme 3: colorless oil, 23.4 mg, 61% yield, 87% ee). The ee was measured by HPLC (Chiralcel OD-H, hexane/2-propanol = 200:1, flow 0.5 mL/min, 254 nm,  $t_1 = 16.0$  min (major),  $t_2 = 19.8$  min (minor)):  $[\alpha]_D^{25} -57$  ( $c$  1.16,  $\text{CHCl}_3$ ) for 87% ee (*S*).  $^1\text{H}$  NMR ( $\text{CDCl}_3$ )  $\delta$  8.28 (d,  $J = 4.4$  Hz, 1H), 7.65 (dd,  $J = 7.6, 1.2$  Hz, 1H), 7.34 (d,  $J = 7.6$  Hz, 2H), 7.30–7.19 (m, 5H), 6.62 (dd,  $J = 7.6, 4.4$  Hz, 1H), 5.04 (bs, 1H), 3.92–3.78 (m, 1H), 3.70 (ddd,  $J = 12.6, 7.2, 5.2$  Hz, 1H), 3.64–3.51 (m, 1H), 3.06 (ddd,  $J = 16.0, 8.0, 6.6$  Hz, 1H), 2.92 (ddd,  $J = 16.0, 8.8, 6.0$  Hz, 1H), 2.40 (s, 3H), 2.36–2.22 (m, 1H), 1.94–1.82 (m, 1H);  $^{13}\text{C}$  NMR ( $\text{CDCl}_3$ )  $\delta$  154.7, 151.7, 145.3, 141.9, 138.6, 138.2, 136.6, 134.9 (q,  $J_{F-C} = 5$  Hz), 128.4, 127.5, 126.9, 125.8, 124.5 (q,  $J_{F-C} = 269$  Hz), 122.9,



111.2, 108.5 (q,  $J_{F-C} = 31$  Hz), 45.3, 44.6, 31.1, 30.2, 21.2. HRMS (DART)  $m/z$ :  $[M + H]^+$  Calcd for  $C_{23}H_{22}F_3N_2$  383.1735; Found 383.1724.

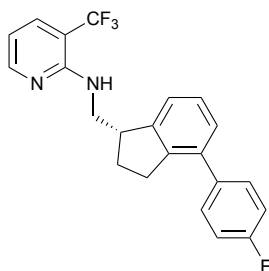

**3ad**

**Compound 3ad** (Scheme 3: colorless oil, 23.1 mg, 60% yield, 90% ee). The ee was measured by HPLC (Chiralcel OD-H, hexane/2-propanol = 200:1, flow 0.5 mL/min, 254 nm,  $t_1 = 15.8$  min (major),  $t_2 = 24.3$  min (minor)):  $[\alpha]^{25}_D -75$  ( $c$  1.13,  $CHCl_3$ ) for 90% ee (*S*).  $^1H$  NMR ( $CDCl_3$ )  $\delta$  8.28 (d,  $J = 5.0$  Hz, 1H), 7.65 (d,  $J = 7.8$ , 1H), 7.39 (d,  $J = 8.8$  Hz, 1H), 7.38 (d,  $J = 8.8$  Hz, 1H), 7.27 (d,  $J = 2.4$  Hz, 1H), 7.26 (d,  $J = 5.9$  Hz, 1H), 7.20 (dd,  $J = 5.9, 2.4$  Hz, 1H), 7.11 (d,  $J = 8.8$  Hz, 1H), 7.09 (d,  $J = 8.8$  Hz, 1H), 6.62 (dd,  $J = 7.8, 5.0$  Hz, 1H), 5.02 (bs, 1H), 3.91–3.80 (m, 1H), 3.70 (ddd,  $J = 12.6, 7.4, 5.0$  Hz, 1H), 3.63–3.53 (m, 1H), 3.01 (ddd,  $J = 16.0, 8.0, 6.8$  Hz, 1H), 2.89 (ddd,  $J = 16.0, 8.8, 6.0$  Hz, 1H), 2.37–2.22 (m, 1H), 1.95–1.81 (m, 1H);  $^{13}C$  NMR ( $CDCl_3$ )  $\delta$  162.0 (d,  $J_{F-C} = 244$  Hz), 154.7, 151.7, 145.4, 141.9, 137.6, 137.1 (d,  $J_{F-C} = 3$  Hz), 135.0 (q,  $J_{F-C} = 5$  Hz), 130.0 (d,  $J_{F-C} = 8$  Hz), 127.4, 127.0, 124.5 (q,  $J_{F-C} = 271$  Hz), 123.2, 115.1 (d,  $J_{F-C} = 21$  Hz), 111.3, 108.5 (q,  $J_{F-C} = 31$  Hz), 45.3, 44.6, 31.1, 30.1. HRMS (DART)  $m/z$ :  $[M + H]^+$  Calcd for  $C_{22}H_{19}F_4N_2$  387.1484; Found 387.1496.

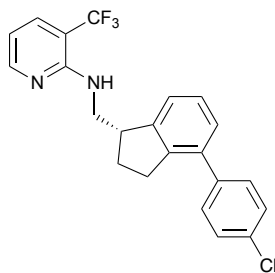

**3ae**

**Compound 3ae** (Scheme 3: colorless oil, 16.0 mg, 40% yield, 88% ee). The ee was measured by HPLC (Chiralcel OD-H, hexane/2-propanol = 200:1, flow 0.5 mL/min, 254 nm,  $t_1 = 14.7$  min (major),  $t_2 = 18.5$  min (minor)):  $[\alpha]^{25}_D -69$  ( $c$  0.80,  $CHCl_3$ ) for 88% ee (*S*).  $^1H$  NMR ( $CDCl_3$ )  $\delta$  8.29 (dd,  $J = 5.0, 1.0$  Hz, 1H), 7.66 (dd,  $J = 7.8, 1.0$  Hz, 1H), 7.43–7.34 (m, 4H), 7.32–7.24 (m, 2H), 7.21 (dd,  $J = 6.8, 2.0$  Hz, 1H), 6.63 (dd,  $J = 7.8, 5.0$  Hz, 1H), 5.02 (bs, 1H), 3.91–3.80 (m, 1H), 3.70 (ddd,  $J = 12.8, 7.2, 5.6$  Hz, 1H), 3.64–3.53 (m, 1H), 3.03 (ddd,  $J = 16.0, 8.4, 6.8$  Hz, 1H), 2.89 (ddd,  $J = 16.0, 8.4, 5.8$  Hz, 1H), 2.38–2.23 (m, 1H), 1.95–1.83 (m, 1H);  $^{13}C$  NMR ( $CDCl_3$ )  $\delta$  154.7, 151.2, 145.5, 141.9, 139.6, 137.4, 135.0 (q,  $J_{F-C} = 5$  Hz), 133.0, 129.8, 128.4, 127.3, 127.0, 124.5 (q,  $J_{F-C} = 270$  Hz), 123.4, 111.3, 108.5 (q,  $J_{F-C} = 31$  Hz), 45.3, 44.6, 31.1, 30.1. HRMS (DART)  $m/z$ :  $[M + H]^+$  Calcd for  $C_{22}H_{19}Cl_1F_3N_2$  403.1189; Found 403.1170.

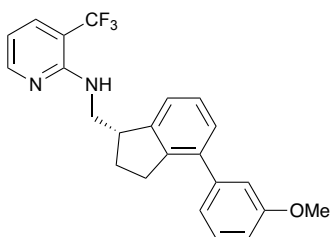

**3af**

**Compound 3af** (Scheme 3: colorless oil, 24.2 mg, 61% yield, 91% ee). The ee was measured by HPLC (Chiralcel OD-H, hexane/2-propanol = 200:1, flow 0.5 mL/min, 254 nm,  $t_1 = 45.0$  min (major),  $t_2 = 56.6$  min (minor)):  $[\alpha]^{25}_D -32$  ( $c$  1.68,  $\text{CHCl}_3$ ) for 91% ee (*S*).  $^1\text{H NMR}$  ( $\text{CDCl}_3$ )  $\delta$  8.30 (d,  $J = 4.8$  Hz, 1H), 7.66 (dd,  $J = 7.6, 1.0$  Hz, 1H), 7.35 (t,  $J = 8.0$  Hz, 1H), 7.32–7.24 (m, 3H), 7.04 (ddd,  $J = 8.0, 1.4, 1.0$  Hz, 1H), 6.99 (dd,  $J = 2.6, 1.4$  Hz, 1H), 6.90 (ddd,  $J = 8.0, 2.6, 1.0$  Hz, 1H), 6.63 (dd,  $J = 7.6, 4.8$  Hz, 1H), 5.05 (bs, 1H), 3.92–3.81 (m, 1H), 3.85 (s, 3H), 3.71 (ddd,  $J = 12.6, 7.2, 5.2$  Hz, 1H), 3.64–3.54 (m, 1H), 3.08 (ddd,  $J = 16.0, 8.2, 6.6$  Hz, 1H), 2.94 (ddd,  $J = 16.0, 8.4, 5.6$  Hz, 1H), 2.38–2.22 (m, 1H), 1.96–1.81 (m, 1H);  $^{13}\text{C NMR}$  ( $\text{CDCl}_3$ )  $\delta$  159.4, 154.7, 151.7, 145.3, 142.6, 142.0, 138.5, 134.9 (q,  $J_{F-C} = 5$  Hz), 129.2, 127.4, 126.9, 124.5 (q,  $J_{F-C} = 270$  Hz), 123.2, 121.0, 114.2, 112.5, 111.3, 108.5 (q,  $J_{F-C} = 31$  Hz), 55.2, 45.4, 44.6, 31.2, 30.2. HRMS (DART)  $m/z$ :  $[\text{M} + \text{H}]^+$  Calcd for  $\text{C}_{23}\text{H}_{22}\text{F}_3\text{N}_2\text{O}_1$  399.1684; Found 399.1677.

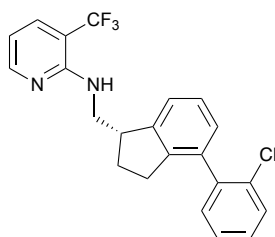

**3ag**

**Compound 3ag** (Scheme 3: colorless oil, 21.3 mg, 53% yield, 87% ee). The ee was measured by HPLC (Chiralcel OD-H, hexane/2-propanol = 200:1, flow 0.5 mL/min, 254 nm,  $t_1 = 14.5$  min (major),  $t_2 = 17.5$  min (minor)):  $[\alpha]^{25}_D -74$  ( $c$  0.99,  $\text{CHCl}_3$ ) for 87% ee (*S*).  $^1\text{H NMR}$  ( $\text{CDCl}_3$ )  $\delta$  8.28 (d,  $J = 4.0$  Hz, 1H), 7.64 (dd,  $J = 7.8, 1.0$  Hz, 1H), 7.49–7.42 (m, 1H), 7.35–7.21 (m, 5H), 7.10 (d,  $J = 7.2$  Hz, 1H), 6.61 (dd,  $J = 8.0, 5.2$  Hz, 1H), 5.02 (bs, 1H), 3.90–3.79 (m, 1H), 3.69 (ddd,  $J = 12.4, 7.0, 5.4$  Hz, 1H), 3.65–3.55 (m, 1H), 3.08–2.49 (m, 2H), 2.40–2.18 (m, 1H), 1.96–1.78 (m, 1H);  $^{13}\text{C NMR}$  ( $\text{CDCl}_3$ )  $\delta$  153.7, 151.7, 144.7, 143.2, 140.0, 136.4, 134.9 (q,  $J_{F-C} = 5$  Hz), 133.0, 130.9, 129.5, 128.6, 127.9, 126.5, 126.3, 124.5 (q,  $J_{F-C} = 270$  Hz), 123.1, 111.3, 108.5 (q,  $J_{F-C} = 31$  Hz), 45.4, 44.7, 30.4, 29.6. HRMS (DART)  $m/z$ :  $[\text{M} + \text{H}]^+$  Calcd for  $\text{C}_{22}\text{H}_{19}^{35}\text{Cl}_1\text{F}_3\text{N}_2$  403.1189; Found 403.1182.

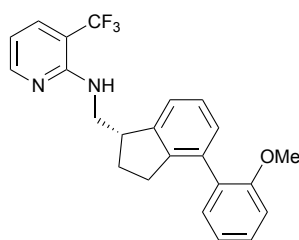

**3ah**

**Compound 3ah** (Scheme 3: colorless oil, 33.6 mg, 84% yield, 90% ee). The ee was measured by HPLC (Chiralcel OD-H, hexane/2-propanol = 200:1, flow 0.5 mL/min, 254 nm,  $t_1$  = 19.1 min (major),  $t_2$  = 22.0 min (minor)):  $[\alpha]^{25}_D -32$  ( $c$  1.68,  $\text{CHCl}_3$ ) for 90% ee (*S*).  $^1\text{H NMR}$  ( $\text{CDCl}_3$ )  $\delta$  8.29 (d,  $J$  = 5.0 Hz, 1H), 7.66 (dd,  $J$  = 7.0, 1.2 Hz, 1H), 7.34 (td,  $J$  = 8.0, 1.6 Hz, 1H), 7.27 (t,  $J$  = 7.6 Hz, 1H), 7.26 (d,  $J$  = 7.2 Hz, 1H), 7.22 (d,  $J$  = 7.8, 1.8 Hz, 1H), 7.18 (dd,  $J$  = 7.4, 1.4 Hz, 1H), 7.02 (td,  $J$  = 7.6, 1.2 Hz, 1H), 6.98 (d,  $J$  = 8.0 Hz, 1H), 6.62 (dd,  $J$  = 7.0, 5.0 Hz, 1H), 5.06 (bs, 1H), 3.90–3.80 (m, 1H), 3.79 (s, 3H), 3.71 (ddd,  $J$  = 12.8, 7.2, 5.4 Hz, 1H), 3.64–3.54 (m, 1H), 2.85 (ddd,  $J$  = 16.0, 8.2, 6.6 Hz, 1H), 2.73 (ddd,  $J$  = 16.0, 8.0, 6.0 Hz, 1H), 2.35–2.21 (m, 1H), 1.91–1.78 (m, 1H);  $^{13}\text{C NMR}$  ( $\text{CDCl}_3$ )  $\delta$  156.4, 154.7, 151.7, 144.4, 143.6, 135.6, 134.9 (q,  $J_{F-C}$  = 5 Hz), 131.0, 130.0, 128.6, 128.4, 126.2, 124.5 (q,  $J_{F-C}$  = 270 Hz), 123.0, 120.4, 111.2, 110.7, 108.5 (q,  $J_{F-C}$  = 32 Hz), 55.3, 45.4, 44.6, 30.6, 29.8. HRMS (DART)  $m/z$ :  $[\text{M} + \text{H}]^+$  Calcd for  $\text{C}_{23}\text{H}_{22}\text{F}_3\text{N}_2\text{O}_1$  399.1684; Found 399.1698.

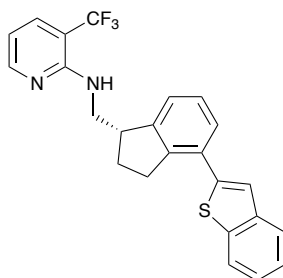

**3ai**

**Compound 3ai** (Scheme 3: colorless solid, 14.0 mg, 33% yield, 86% ee). The ee was measured by HPLC (Chiralpak AD-H, hexane/2-propanol = 30:1, flow 0.5 mL/min, 254 nm,  $t_1$  = 14.6 min (minor),  $t_2$  = 15.4 min (major)):  $[\alpha]^{25}_D -32$  ( $c$  1.68,  $\text{CHCl}_3$ ) for 86% ee (*S*).  $^1\text{H NMR}$  ( $\text{CDCl}_3$ )  $\delta$  8.30 (d,  $J$  = 4.8 Hz, 1H), 7.85 (d,  $J$  = 7.6 Hz, 1H), 7.79 (d,  $J$  = 7.2 Hz, 1H), 7.67 (d,  $J$  = 6.8 Hz, 1H), 7.52 (dd,  $J$  = 6.4, 2.4 Hz, 1H), 7.42 (s, 1H), 7.41–7.23 (m, 4H), 6.64 (dd,  $J$  = 6.8, 4.8 Hz, 1H), 5.04 (bs, 1H), 3.89–3.79 (m, 1H), 3.72 (ddd,  $J$  = 12.8, 7.4, 5.6 Hz, 1H), 3.67–3.56 (m, 1H), 3.29 (ddd,  $J$  = 15.6, 8.4, 6.8 Hz, 1H), 3.17 (ddd,  $J$  = 15.6, 8.8, 5.6 Hz, 1H), 2.43–2.31 (m, 1H), 2.03–1.91 (m, 1H);  $^{13}\text{C NMR}$  ( $\text{CDCl}_3$ )  $\delta$  156.6, 151.7, 146.0, 143.4, 141.9, 140.4, 139.6, 135.0 (q,  $J_{F-C}$  = 5 Hz), 131.3, 127.4, 127.1, 124.5 (q,  $J_{F-C}$  = 270 Hz), 124.4, 124.2, 124.0, 123.5, 122.0, 121.9, 111.4, 108.5 (q,  $J_{F-C}$  = 31 Hz), 45.4, 44.5, 32.0, 29.9. HRMS (DART)  $m/z$ :  $[\text{M} + \text{H}]^+$  Calcd for  $\text{C}_{24}\text{H}_{20}\text{F}_3\text{S}_1$  425.1299; Found 425.1288.

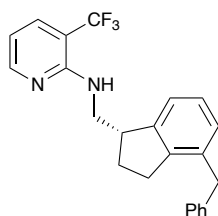

**3aj**

**Compound 3aj** (Scheme 3: colorless oil, 18.7 mg, 49% yield, 87% ee). The ee was measured by HPLC (Chiralcel OD-H, hexane/2-propanol = 200:1, flow 0.5 mL/min, 254 nm,  $t_1$  = 28.1 min (major),  $t_2$  = 36.6 min (minor)):  $[\alpha]^{25}_D -42$  ( $c$  0.78,  $\text{CHCl}_3$ ) for 87% ee (*S*).  $^1\text{H NMR}$  ( $\text{CDCl}_3$ )  $\delta$  8.28 (dd,  $J$  = 5.2, 1.2 Hz, 1H), 7.65 (dd,  $J$  = 7.6, 1.2 Hz, 1H), 7.33–7.23 (m, 2H), 7.25–7.11 (m, 5H), 7.01 (dd,  $J$  = 6.8, 2.0 Hz, 1H), 6.62 (dd,  $J$  = 7.6, 5.2 Hz, 1H), 4.98 (bs, 1H), 3.97 (s, 2H), 3.84–3.73 (m, 1H), 3.65 (ddd,  $J$  = 12.8, 6.8, 5.2 Hz, 1H), 3.60–3.49 (m, 1H), 2.89 (ddd,  $J$  = 15.6, 8.8, 6.8 Hz, 1H), 2.78 (ddd,  $J$  = 15.6, 8.8, 6.0 Hz, 1H), 2.38–2.22 (m, 1H), 1.95–1.81 (m, 1H);  $^{13}\text{C NMR}$  ( $\text{CDCl}_3$ )  $\delta$  154.7, 151.7, 144.7, 143.2, 140.3, 137.0, 134.9 (q,  $J_{F-C}$  = 5 Hz), 128.8, 128.4, 127.8, 126.7, 125.9, 124.4 (q,  $J_{F-C}$  = 270 Hz), 122.1, 111.2, 108.5 (q,  $J_{F-C}$  = 31 Hz), 45.4, 44.5, 39.6, 29.8, 29.4. HRMS (DART)  $m/z$ :  $[\text{M} + \text{H}]^+$  Calcd for  $\text{C}_{23}\text{H}_{22}\text{F}_3\text{N}_2$  383.1735; Found 383.1736.

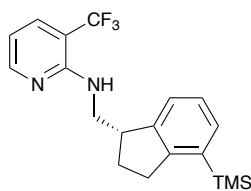

**3ak**

**Compound 3ak** (Scheme 3: colorless solid, 19.1 mg, 52% yield, 86% ee). The ee was measured by HPLC (Chiralcel OD-H, hexane only, flow 0.5 mL/min, 254 nm,  $t_1$  = 18.9 min (major),  $t_2$  = 22.7 min (minor)):  $[\alpha]^{25}_D -48$  ( $c$  0.97,  $\text{CHCl}_3$ ) for 86% ee (*S*).  $^1\text{H NMR}$  ( $\text{CDCl}_3$ )  $\delta$  8.28 (d,  $J$  = 4.8 Hz, 1H), 7.64 (d,  $J$  = 7.6 Hz, 1H), 7.63 (d,  $J$  = 7.2 Hz, 1H), 7.29 (d,  $J$  = 7.2 Hz, 1H), 7.18 (d,  $J$  = 7.2 Hz, 1H), 6.61 (dd,  $J$  = 7.6, 4.8 Hz, 1H), 4.99 (bs, 1H), 3.83–3.74 (m, 1H), 3.65 (ddd,  $J$  = 12.6, 7.2, 5.6 Hz, 1H), 3.55–3.45 (m, 1H), 3.12–3.00 (m, 1H), 3.01–2.90 (m, 1H), 2.30–2.25 (m, 1H), 2.00–1.82 (m, 1H), 0.31 (s, 9H);  $^{13}\text{C NMR}$  ( $\text{CDCl}_3$ )  $\delta$  154.7, 151.7, 149.6, 143.6, 135.8, 135.0 (q,  $J_{F-C}$  = 5 Hz), 132.6, 125.7, 125.0, 124.5 (q,  $J_{F-C}$  = 270 Hz), 111.2, 108.4 (q,  $J_{F-C}$  = 31 Hz), 45.5, 43.8, 32.3, 29.7, -0.48. HRMS (DART)  $m/z$ :  $[\text{M} + \text{H}]^+$  Calcd for  $\text{C}_{19}\text{H}_{24}\text{F}_3\text{N}_2\text{Si}$  365.1653; Found 365.1661.

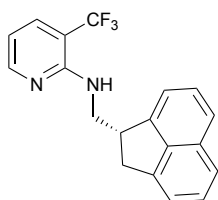

**3al**

**Compound 3al** (Scheme 3: colorless solid, 28.0 mg, 85% yield, 88% ee). The ee was measured by HPLC (Chiralcel OD-H, hexane/2-propanol = 19:1, flow 0.5 mL/min, 254 nm,  $t_1$  = 10.2 min

(minor),  $t_2 = 11.3$  min (major)):  $[\alpha]^{25}_D -42$  ( $c$  0.74,  $\text{CHCl}_3$ ) for 88% ee (*S*).  $^1\text{H NMR}$  ( $\text{CDCl}_3$ )  $\delta$  8.30 (d,  $J = 4.8$  Hz, 1H), 7.66 (d,  $J = 8.4$  Hz, 2H), 7.63 (d,  $J = 8.0$  Hz, 1H), 7.52–7.42 (m, 2H), 7.36 (d,  $J = 7.2$  Hz, 1H), 7.29 (d,  $J = 6.8$  Hz, 1H), 6.64 (dd,  $J = 8.0, 4.8$  Hz, 1H), 5.15 (bs, 1H), 4.10 (qd,  $J = 7.2, 2.8$  Hz, 1H), 3.90 (ddd,  $J = 12.8, 7.2, 5.6$  Hz, 1H), 3.77 (ddd,  $J = 13.2, 7.2, 5.6$  Hz, 1H), 3.63 (dd,  $J = 17.6, 8.0$  Hz, 1H), 3.18 (dd,  $J = 17.6, 3.2$  Hz, 1H);  $^{13}\text{C NMR}$  ( $\text{CDCl}_3$ )  $\delta$  154.5, 151.7, 146.5, 143.9, 138.8, 135.0 (q,  $J_{F-C} = 5$  Hz), 131.6, 128.0, 127.8, 124.5 (q,  $J_{F-C} = 270$  Hz), 123.3, 122.5, 119.5, 119.4, 111.4, 108.9 (q,  $J_{F-C} = 31$  Hz), 46.5, 42.8, 35.7. HRMS (DART)  $m/z$ :  $[\text{M} + \text{H}]^+$  Calcd for  $\text{C}_{19}\text{H}_{16}\text{F}_3\text{N}_2$  329.1263; Found 329.1266.

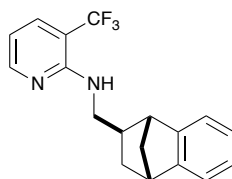

**3am**

**Compound 3am** (Scheme 3: colorless oil, 23.8 mg, 75% yield, 42% ee). The ee was measured by HPLC (Chiralcel OJ-H-OJ-H, hexane/2-propanol = 200:1, flow 0.5 mL/min, 254 nm,  $t_1 = 40.4$  min (major),  $t_2 = 42.6$  min (minor)):  $[\alpha]^{25}_D +28$  ( $c$  1.12,  $\text{CHCl}_3$ ) for 42% ee.  $^1\text{H NMR}$  ( $\text{CDCl}_3$ )  $\delta$  8.26 (d,  $J = 4.8$  Hz, 1H), 7.65 (d,  $J = 7.4, 1.0$  Hz, 1H), 7.16 (d,  $J = 5.2$  Hz, 1H), 7.14 (d,  $J = 5.2$  Hz, 1H), 7.07 (d,  $J = 5.2$  Hz, 1H), 7.05 (d,  $J = 5.2$  Hz, 1H), 6.61 (dd,  $J = 7.4, 4.8$  Hz, 1H), 4.97 (bs, 1H), 3.71–3.54 (m, 2H), 3.36 (s, 1H), 3.21 (s, 1H), 1.92–1.74 (m, 3H), 1.58–1.50 (m, 2H);  $^{13}\text{C NMR}$  ( $\text{CDCl}_3$ )  $\delta$  154.7, 151.7, 148.2, 148.2, 135.0 (q,  $J_{F-C} = 5$  Hz), 125.6, 125.6, 124.5 (q,  $J_{F-C} = 270$  Hz), 120.7, 120.4, 111.2, 108.5 (q,  $J_{F-C} = 31$  Hz), 46.5, 46.4, 46.0, 43.8, 40.8, 33.1. HRMS (DART)  $m/z$ :  $[\text{M} + \text{H}]^+$  Calcd for  $\text{C}_{18}\text{H}_{18}\text{F}_3\text{N}_2$  319.1422; Found 319.1409.

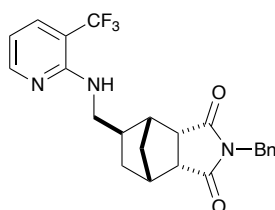

**3an**

**Compound 3an** (Scheme 3: colorless oil, 31.8 mg, 74% yield, 89% ee). Hexane was used as an eluent for preparative TLC. The ee was measured by HPLC (Chiralpak AD-H, hexane/2-propanol = 9:1, flow 0.5 mL/min, 254 nm,  $t_1 = 28.4$  min (minor),  $t_2 = 31.2$  min (major)):  $[\alpha]^{25}_D +37$  ( $c$  1.54,  $\text{CHCl}_3$ ) for 89% ee.  $^1\text{H NMR}$  ( $\text{CDCl}_3$ )  $\delta$  8.20 (d,  $J = 4.8$  Hz, 1H), 7.62 (d,  $J = 7.4$  Hz, 1H), 7.45–7.36 (m, 2H), 7.29–7.20 (m, 3H), 6.60 (dd,  $J = 7.4, 4.8$  Hz, 1H), 4.61 (s, 2H), 4.53 (bs, 1H), 3.31 (ddd,  $J = 12.8, 6.8, 5.2$  Hz, 1H), 3.16 (ddd,  $J = 12.8, 8.0, 5.2$  Hz, 1H), 3.13–3.01 (m, 2H), 2.74 (d,  $J = 4.2$  Hz, 1H), 2.60 (d,  $J = 4.2$  Hz, 1H), 1.82–1.69 (m, 1H), 1.57–1.39 (m, 2H), 1.27–1.04 (m, 2H);  $^{13}\text{C NMR}$  ( $\text{CDCl}_3$ )  $\delta$  177.6, 177.5, 154.4, 151.5, 136.1, 134.9 (q,  $J_{F-C} = 5$  Hz), 129.0, 128.4, 128.1, 124.3 (q,  $J_{F-C} = 271$  Hz), 111.4, 108.5 (q,  $J_{F-C} = 31$  Hz), 48.3, 47.9, 45.8, 42.4, 42.1, 39.6,

39.4, 36.6, 30.1. HRMS (DART)  $m/z$ :  $[M + H]^+$  Calcd for  $C_{23}H_{23}F_3N_3O_2$  430.1742; Found 430.1736.

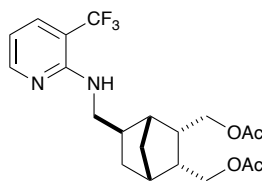

**3ao**

**Compound 3ao** (Scheme 3: colorless oil, 34.9 mg, 84% yield, 81% ee). Hexane was used as an eluent for preparative TLC. The ee was measured by HPLC (Chiralpak AD-H, hexane/2-propanol = 9:1, flow 0.5 mL/min, 254 nm,  $t_1$  = 13.1 min (minor),  $t_2$  = 14.0 min (major)):  $[\alpha]_D^{25} -5$  ( $c$  1.75,  $CHCl_3$ ) for 81% ee.  $^1H$  NMR ( $CDCl_3$ )  $\delta$  8.24 (d,  $J$  = 5.2 Hz, 1H), 7.62 (d,  $J$  = 7.6 Hz, 1H), 6.59 (dd,  $J$  = 7.6, 5.2 Hz, 1H), 4.90 (bs, 1H), 4.18 (dd,  $J$  = 10.6, 5.8 Hz, 1H), 4.10 (t,  $J$  = 10.6 Hz, 1H), 4.06 (s, 1H), 4.04 (s, 1H), 3.39–3.20 (m, 2H), 2.38–2.28 (m, 3H), 2.25–2.20 (m, 1H), 2.12–2.05 (m, 1H), 2.03 (s, 3H), 1.98 (s, 3H), 1.73 (ddd,  $J$  = 13.2, 8.8, 2.4 Hz, 1H), 1.58 (d,  $J$  = 10.4 Hz, 1H), 1.34 (d,  $J$  = 10.4 Hz, 1H), 1.03 (dt,  $J$  = 13.2, 4.4 Hz, 1H);  $^{13}C$  NMR ( $CDCl_3$ )  $\delta$  171.0, 170.9, 154.5, 151.7, 134.8 (q,  $J_{F-C}$  = 5 Hz), 124.5 (q,  $J_{F-C}$  = 273 Hz), 111.1, 108.2 (q,  $J_{F-C}$  = 32 Hz), 62.5, 61.4, 45.9, 41.9, 39.7, 39.6, 38.3, 36.3, 33.3, 28.7, 21.0, 20.6. HRMS (DART)  $m/z$ :  $[M + H]^+$  Calcd for  $C_{20}H_{26}F_3N_2O_4$  415.1845; Found 415.1835.

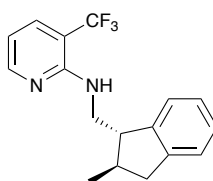

**3ap**

**Compound 3ap** (Scheme 5: colorless oil, 21.2 mg, 70% yield, 81% ee). The ee was measured by HPLC (Chiralcel OJ-H, hexane/2-propanol = 200:1, flow 0.5 mL/min, 254 nm,  $t_1$  = 12.4 min (minor),  $t_2$  = 13.2 min (major)):  $[\alpha]_D^{25} -42$  ( $c$  0.13,  $CHCl_3$ ) for 81% ee.  $^1H$  NMR ( $CDCl_3$ )  $\delta$  8.28 (d,  $J$  = 4.4 Hz, 1H), 7.64 (d,  $J$  = 7.8 Hz, 1H), 7.30–7.12 (m, 4H), 6.61 (dd,  $J$  = 7.8, 4.4 Hz, 1H), 4.95 (bs, 1H), 3.84–3.70 (m, 2H), 3.15 (dd,  $J$  = 15.6, 8.0 Hz, 1H), 3.08 (q,  $J$  = 6.0 Hz, 1H), 2.54 (dd,  $J$  = 15.6, 6.2 Hz, 1H), 2.34 (sept,  $J$  = 6.8 Hz, 1H), 1.78 (d,  $J$  = 6.8 Hz, 3H);  $^{13}C$  NMR ( $CDCl_3$ )  $\delta$  154.7, 151.7, 143.9, 143.4, 134.9 (q,  $J_{F-C}$  = 5 Hz), 127.0, 126.3, 124.8, 124.4 (q,  $J_{F-C}$  = 270 Hz), 124.1, 111.2, 108.5 (q,  $J_{F-C}$  = 34 Hz), 52.1, 44.2, 39.9, 38.2, 20.3. HRMS (DART)  $m/z$ :  $[M + H]^+$  Calcd for  $C_{17}H_{18}F_3N_2$  307.1422; Found 307.1414.

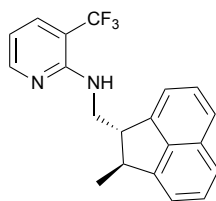

**3aq**

**Compound 3aq** (Scheme 5: colorless oil, 21.2 mg, 62% yield, 84% ee). The ee was measured by HPLC (Chiralcel OJ-H, hexane/2-propanol = 200:1, flow 0.5 mL/min, 254 nm,  $t_1$  = 21.9 min (minor),  $t_2$  = 27.1 min (major)):  $[\alpha]^{25}_D -49$  ( $c$  0.84,  $\text{CHCl}_3$ ) for 84% ee.  $^1\text{H NMR}$  ( $\text{CDCl}_3$ )  $\delta$  8.30 (d,  $J$  = 4.8 Hz, 1H), 7.72–7.61 (m, 3H), 7.54–7.45 (m, 2H), 7.36 (d,  $J$  = 6.8 Hz, 1H), 7.27 (d,  $J$  = 6.8 Hz, 1H), 6.64 (dd,  $J$  = 7.2, 4.8 Hz, 1H), 5.15 (bs, 1H), 3.91 (t,  $J$  = 6.4 Hz, 2H), 3.63 (td,  $J$  = 6.4, 3.2 Hz, 1H), 3.51 (qd,  $J$  = 7.2, 3.2 Hz, 1H), 1.48 (d,  $J$  = 7.4 Hz, 3H);  $^{13}\text{C NMR}$  ( $\text{CDCl}_3$ )  $\delta$  154.6, 151.7, 149.0, 145.1, 137.7, 135.0 (q,  $J_{F-C}$  = 5 Hz), 131.5, 128.1, 127.9, 124.4 (q,  $J_{F-C}$  = 270 Hz), 123.4, 122.8, 119.4, 118.7, 111.4, 108.5 (q,  $J_{F-C}$  = 31 Hz), 52.2, 45.7, 43.7, 21.4. HRMS (DART)  $m/z$ :  $[\text{M} + \text{H}]^+$  Calcd for  $\text{C}_{20}\text{H}_{18}\text{F}_3\text{N}_2$  343.1422; Found 343.1409.

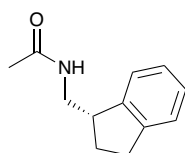

**5**

**Compound 5** (Scheme 4: colorless solid, 23.0 mg, 40% yield, 91% ee). The ee was measured by HPLC (Chiralpak IB, hexane/ $\text{CHCl}_3$ /EtOH = 8:2:1, flow 0.5 mL/min, 254 nm,  $t_1$  = 9.6 min (major),  $t_2$  = 10.0 min (minor)):  $[\alpha]^{25}_D +14$  ( $c$  0.67,  $\text{CHCl}_3$ ) for 91% ee (*S*).  $^1\text{H NMR}$  ( $\text{CDCl}_3$ )  $\delta$  7.28–7.15 (m, 4H), 5.52 (bs, 1H), 3.70–3.57 (m, 1H), 3.46–3.31 (m, 2H), 3.01–2.80 (m, 2H), 2.32–2.20 (m, 1H), 1.97 (s, 3H), 1.87–1.76 (m, 1H);  $^{13}\text{C NMR}$  ( $\text{CDCl}_3$ )  $\delta$  170.3, 144.5, 143.9, 127.0, 126.3, 124.8, 123.7, 44.6, 42.8, 31.2, 29.5, 23.4. HRMS (DART)  $m/z$ :  $[\text{M} + \text{H}]^+$  Calcd for  $\text{C}_{12}\text{H}_{16}\text{NO}$  190.1240; Found 190.1232.

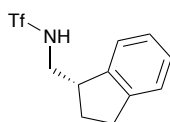

**6**

**Compound 6** (Scheme 4: colorless solid, 8.3 mg, 20% yield, 91% ee, CAS: 2088274-15-9 for (*R*)-6). The ee was measured by HPLC (Chiralcel OJ-H, hexane/2-propanol = 18:1, flow 0.5 mL/min, 254 nm,  $t_1$  = 35.2 min (minor),  $t_2$  = 44.5 min (major)):  $[\alpha]^{25}_D +5$  ( $c$  0.26,  $\text{CHCl}_3$ ) for 91% ee (*S*).  $^1\text{H NMR}$  ( $\text{CDCl}_3$ )  $\delta$  7.28–7.12 (m, 4H), 6.25 (s, 1H), 3.72–3.62 (m, 1H), 3.60–3.49 (m, 1H), 3.53–3.39 (m, 1H), 3.09–2.80 (m, 2H), 2.39–2.23 (m, 1H), 1.90–1.78 (m, 1H).

# 14. <sup>1</sup>H, <sup>13</sup>C NMR spectra and chiral HPLC charts

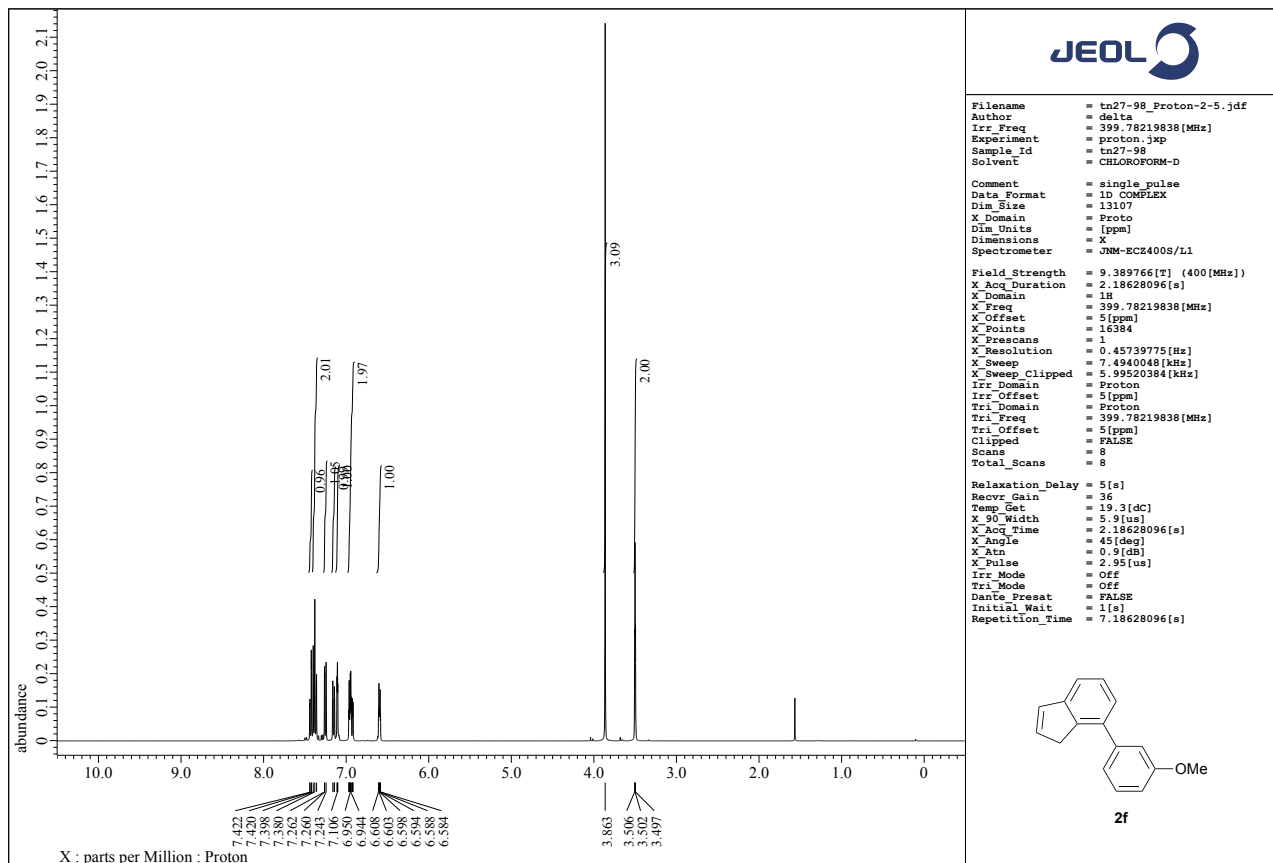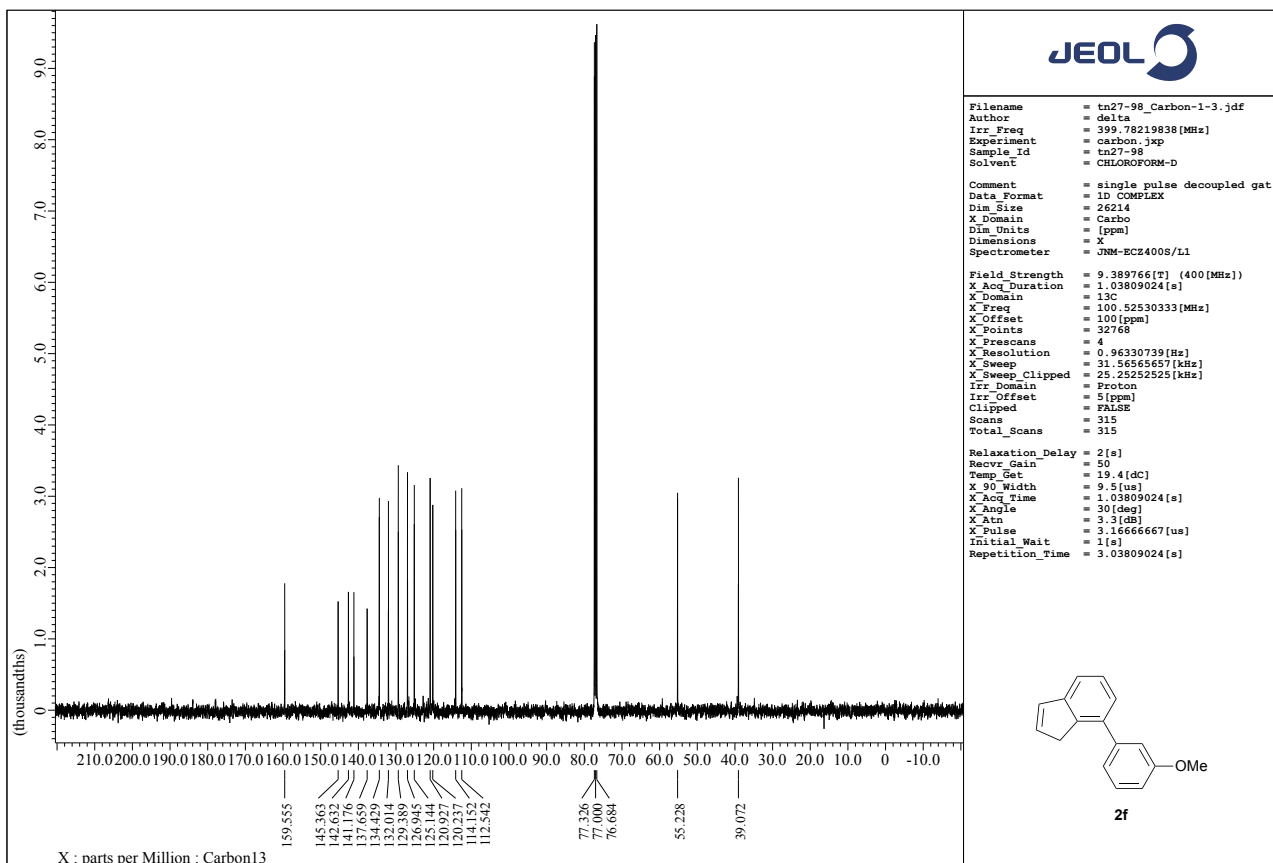



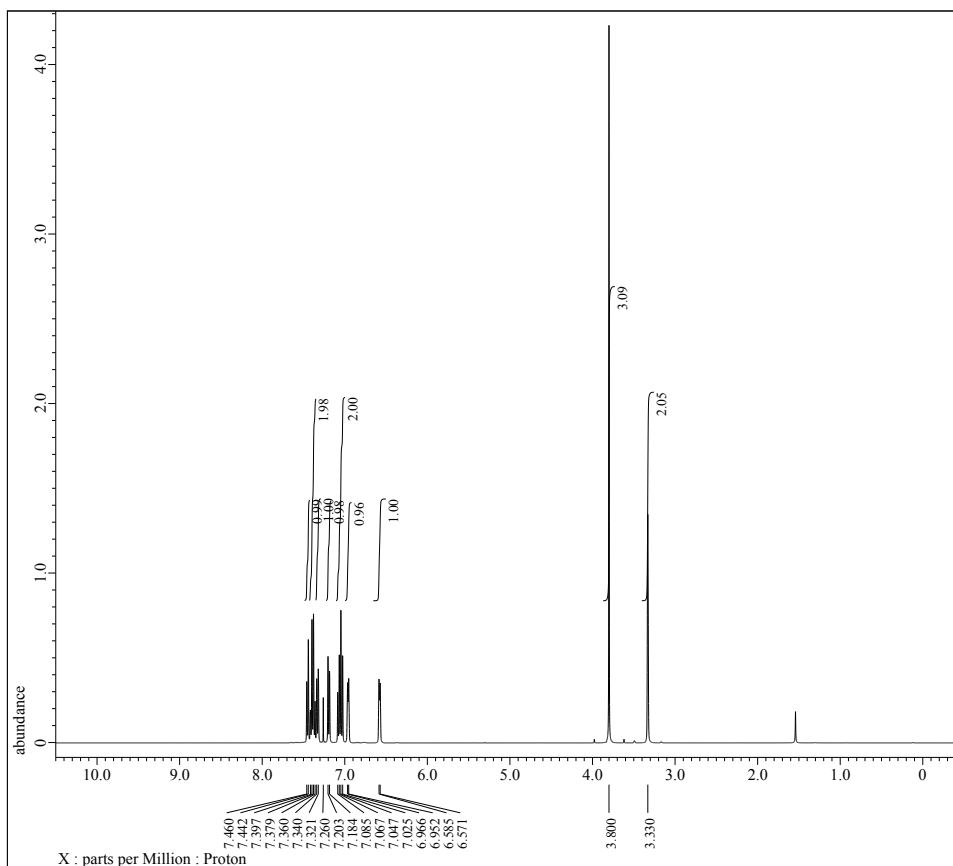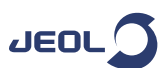

```

Filename      = tn28-8-3_Proton-1-5.jdf
Author       = delta
Irr_Freq     = 399.78219838 [MHz]
Experiment   = proton.jxp
Sample_Id    = tn28-8-3
Solvent      = CHLOROFORM-D
Comment      = single_pulse
Data_Format  = 1D_COMPLEX
Dim_Size     = 13107
X_Domain     = Proto
Dim_Units    = [ppm]
Dimensions   = X
Spectrometer = JNM-ECA400S/L1

Field_Strength = 9.389766 [T] (400 [MHz])
X_Acq_Duration = 2.18628096 [s]
X_Domain       = 1H
X_Freq         = 399.78219838 [MHz]
X_Offset       = 5 [ppm]
X_Points       = 16384
X_Prescans    = 1
X_Resolution  = 0.45739775 [Hz]
X_Sweep       = 7.4940048 [kHz]
X_Sweep_Clipped = 5.99520384 [kHz]
Irr_Domain    = Proton
Irr_Offset    = 5 [ppm]
Tri_Domain    = Proton
Tri_Freq      = 399.78219838 [MHz]
Tri_Offset    = 5 [ppm]
Clipped       = FALSE
Scans         = 8
Total_Scans   = 8

Relaxation_Delay = 5 [s]
Recvr_Gain       = 46
Temp_Get         = 18.3 [dC]
X_90_Width      = 5.9 [us]
X_Acq_Time      = 2.18628096 [s]
X_Angle         = 45 [deg]
X_Atn           = 0.9 [dB]
X_Pulse         = 2.95 [us]
Irr_Mode        = Off
Tri_Mode        = Off
DANTE_Preset    = FALSE
Initial_Wait    = 1 [s]
Repetition_Time = 7.18628096 [s]
  
```

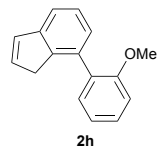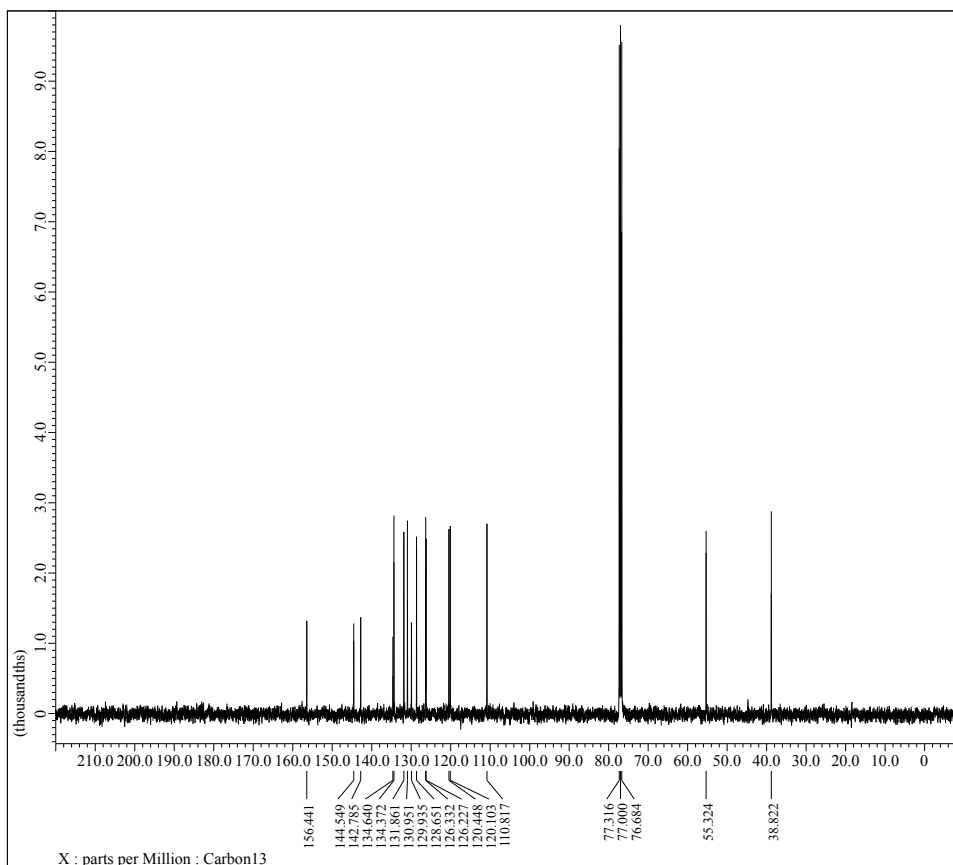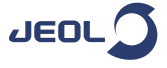

```

Filename      = tn28-8-3_Carbon-1-3.jdf
Author       = delta
Irr_Freq     = 399.78219838 [MHz]
Experiment   = carbon.jxp
Sample_Id    = tn28-8-3
Solvent      = CHLOROFORM-D
Comment      = single pulse decoupled gat
Data_Format  = 1D_COMPLEX
Dim_Size     = 26214
X_Domain     = Carbo
Dim_Units    = [ppm]
Dimensions   = X
Spectrometer = JNM-ECA400S/L1

Field_Strength = 9.389766 [T] (400 [MHz])
X_Acq_Duration = 1.03809024 [s]
X_Domain       = 13C
X_Freq         = 100.52530333 [MHz]
X_Offset       = 100 [ppm]
X_Points       = 32768
X_Prescans    = 4
X_Resolution  = 0.96330739 [Hz]
X_Sweep       = 31.56565657 [kHz]
X_Sweep_Clipped = 25.25252525 [kHz]
Irr_Domain    = Proton
Irr_Offset    = 5 [ppm]
Clipped       = FALSE
Scans         = 256
Total_Scans   = 256

Relaxation_Delay = 2 [s]
Recvr_Gain       = 50
Temp_Get         = 18.3 [dC]
X_90_Width      = 9.5 [us]
X_Acq_Time      = 1.03809024 [s]
X_Angle         = 30 [deg]
X_Atn           = 3.3 [dB]
X_Pulse         = 3.16666667 [us]
Initial_Wait    = 1 [s]
Repetition_Time = 3.03809024 [s]
  
```

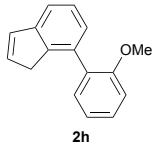

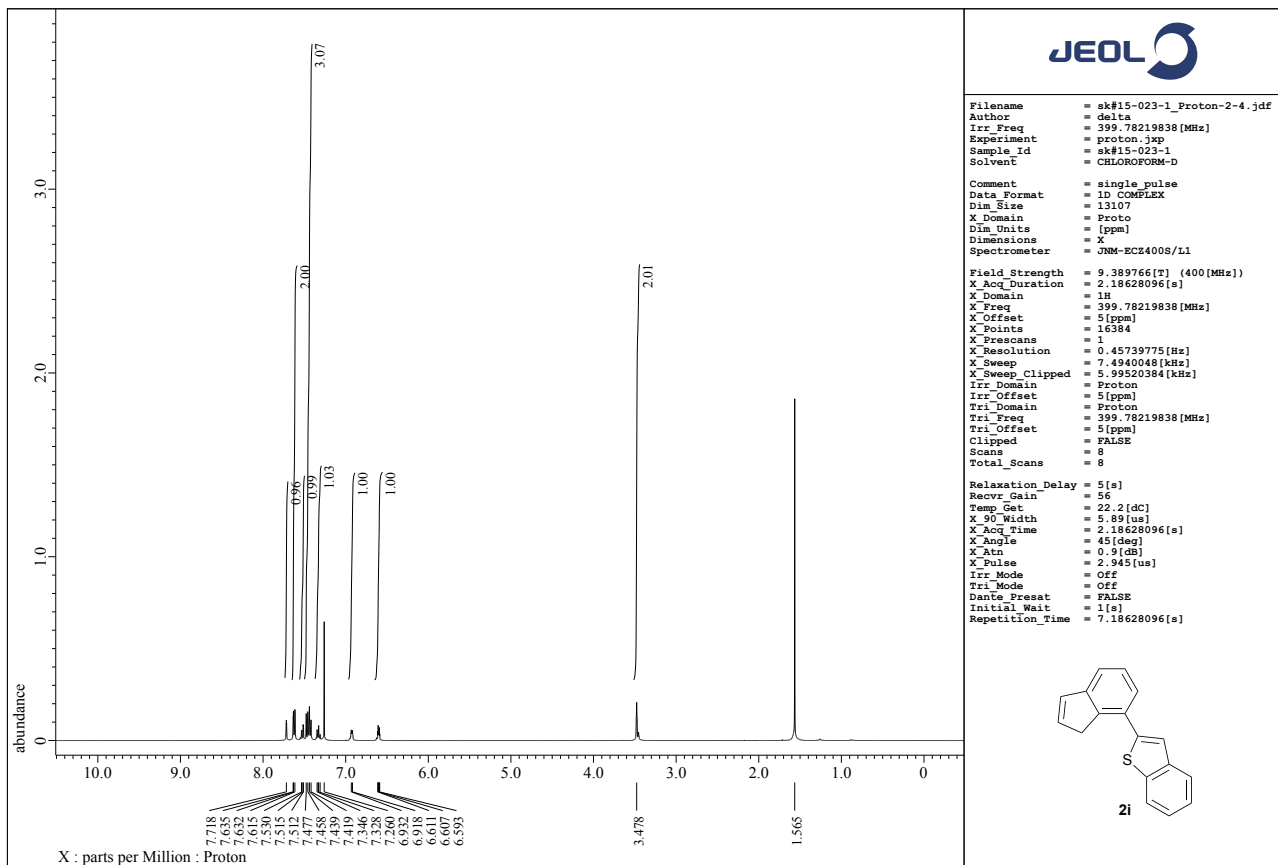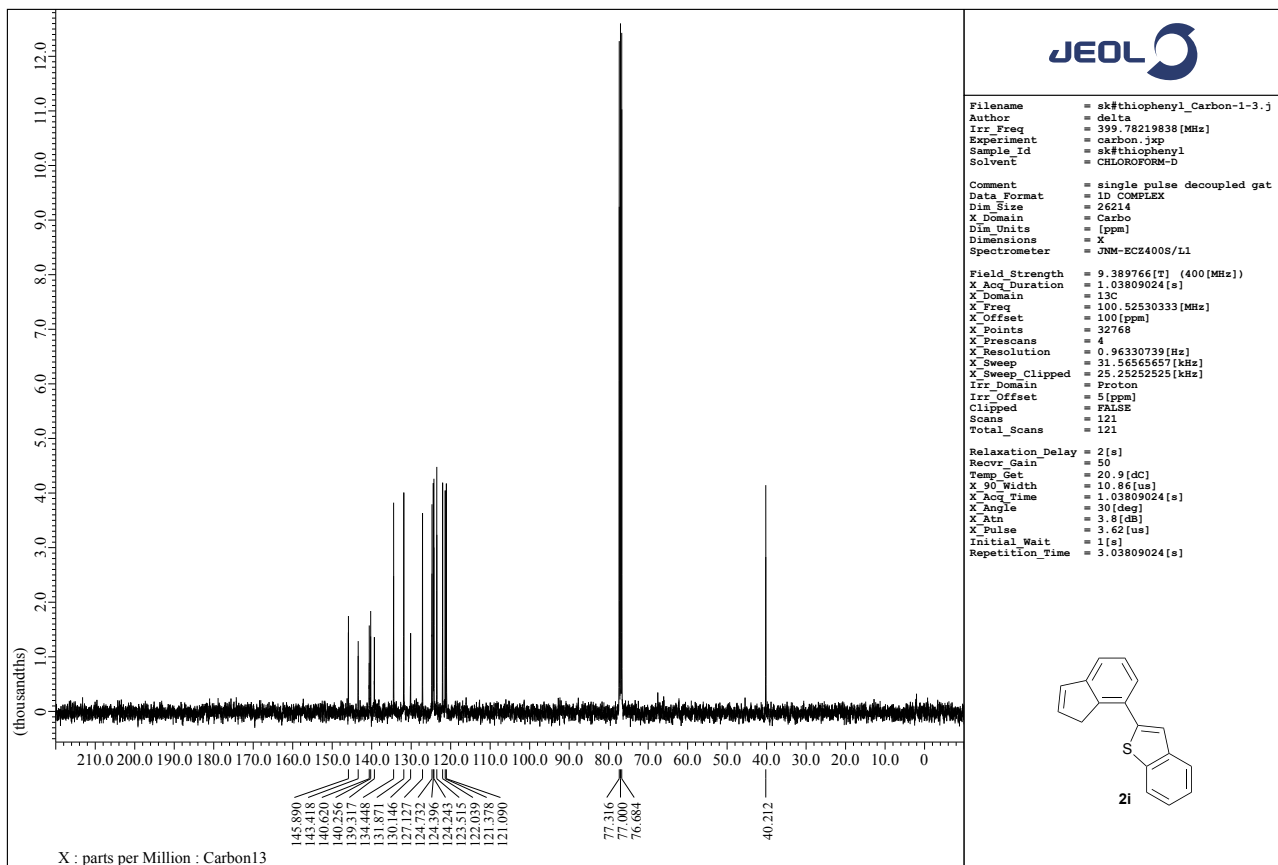

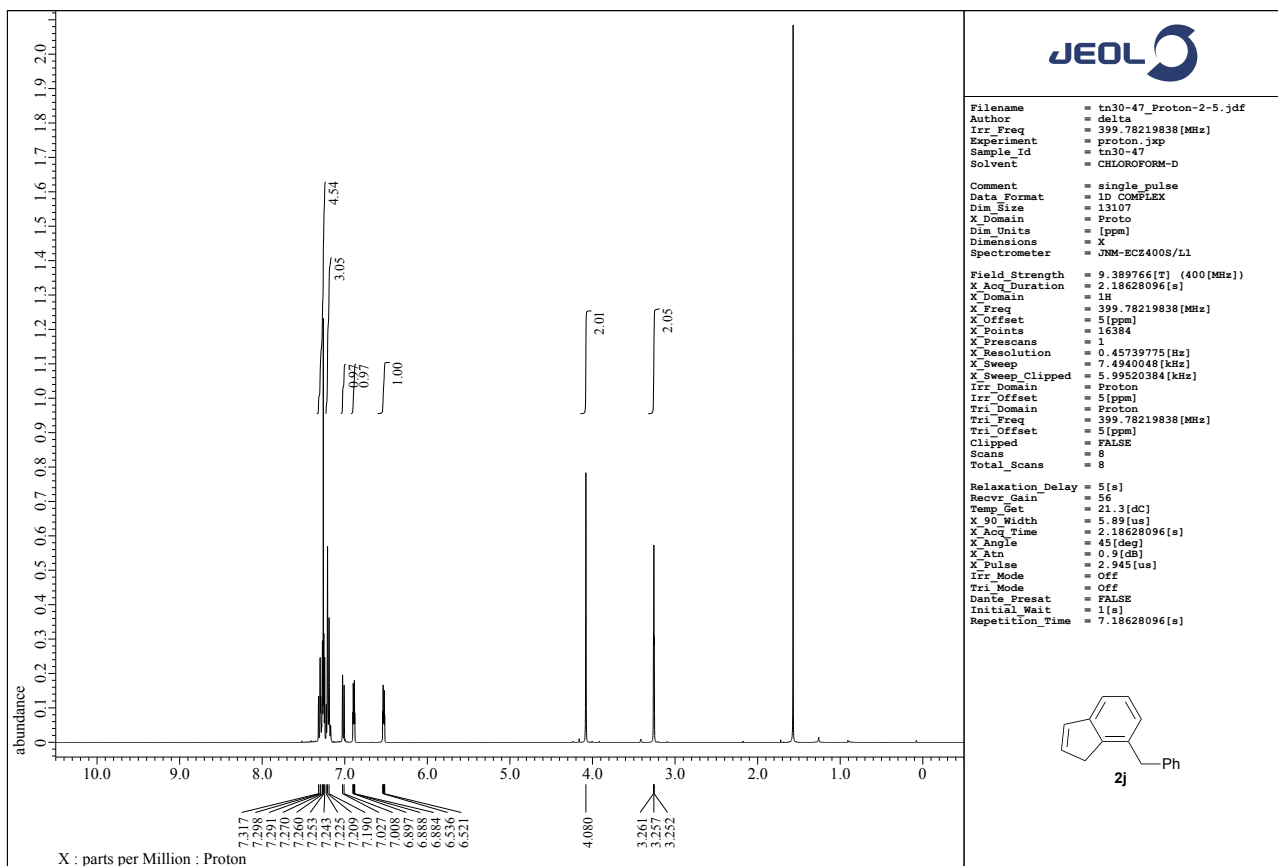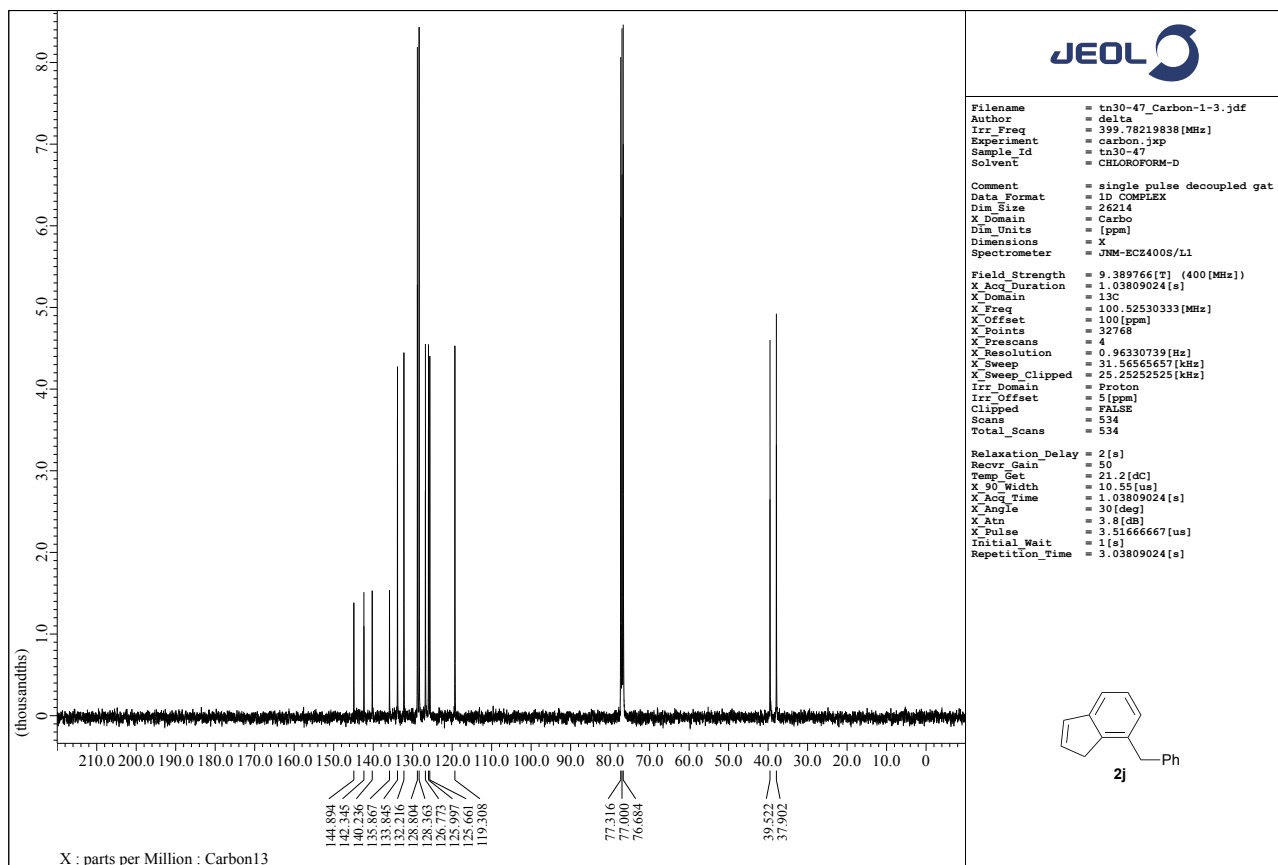

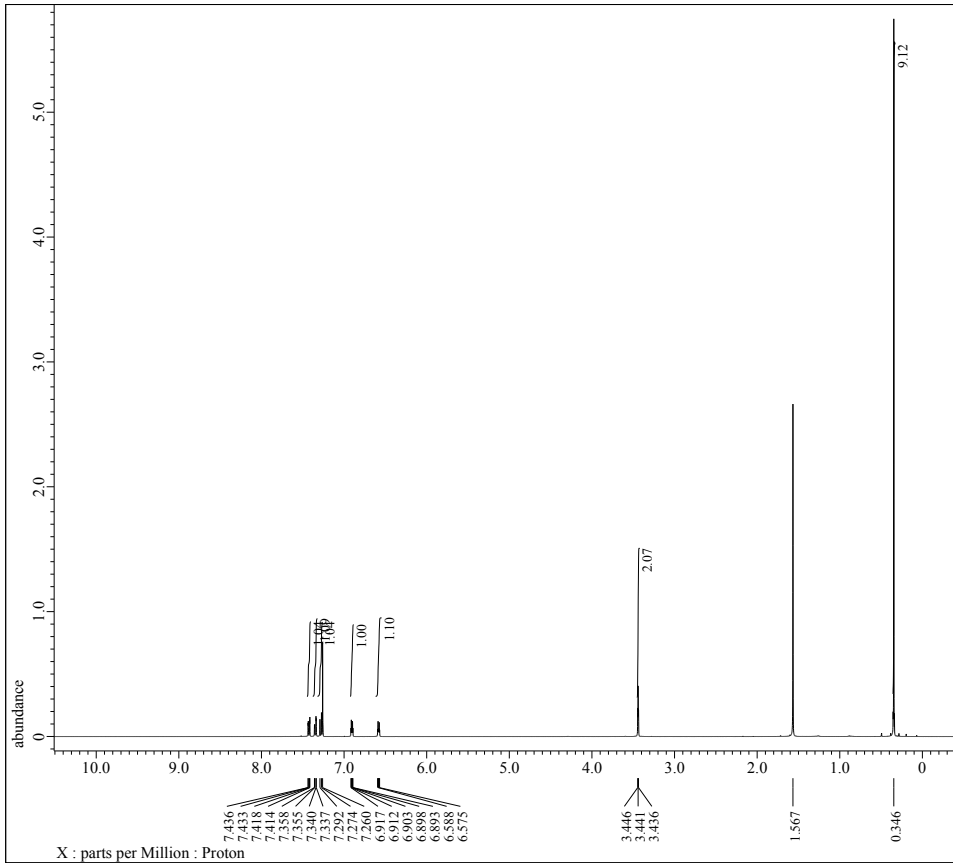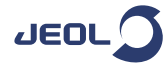

```

Filename      = sk#17-tms_Proton-1-5.jdf
Author       = delta
Irr_Freq     = 399.78219838 [MHz]
Experiment   = proton.jxp
Sample_Id    = sk#17-tms
Solvent      = CHLOROFORM-D
Comment      = single pulse
Data_Format  = 1D COMPLEX
Dim_Size     = 13107
X_Domain     = Proton
Dim_Units    = [ppm]
Dimensions   = X
Spectrometer = JNM-ECZ400S/L1

Field_Strength = 9.389766 [T] (400 [MHz])
X_Acq_Duration = 2.18628096 [s]
X_Domain       = 18
X_Freq         = 399.78219838 [MHz]
X_Offset       = 5 [ppm]
X_Points       = 16384
X_Prescans     = 1
X_Resolution   = 0.45739775 [Hz]
X_Sweep        = 7.4940048 [kHz]
X_Sweep_Clipped = 5.99520384 [kHz]
Irr_Domain     = Proton
Irr_Offset     = 5 [ppm]
Tri_Domain     = Proton
Tri_Freq       = 399.78219838 [MHz]
Tri_Offset     = 5 [ppm]
Clipped        = FALSE
Scans          = 44
Total_Scans    = 44

Relaxation_Delay = 5 [s]
Recvr_Gain       = 56
Temp_Get         = 21.6 [dC]
X_90_Width       = 6.3 [us]
X_Acq_Time       = 2.18628096 [s]
X_Angle          = 45 [deg]
X_Atn            = 0.9 [dB]
X_Pulse          = 3.15 [us]
Irr_Mode         = Off
Tri_Mode         = Off
Danfe_Preset    = FALSE
Initial_Wait     = 1 [s]
Repetition_Time = 7.18628096 [s]
  
```

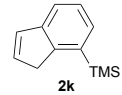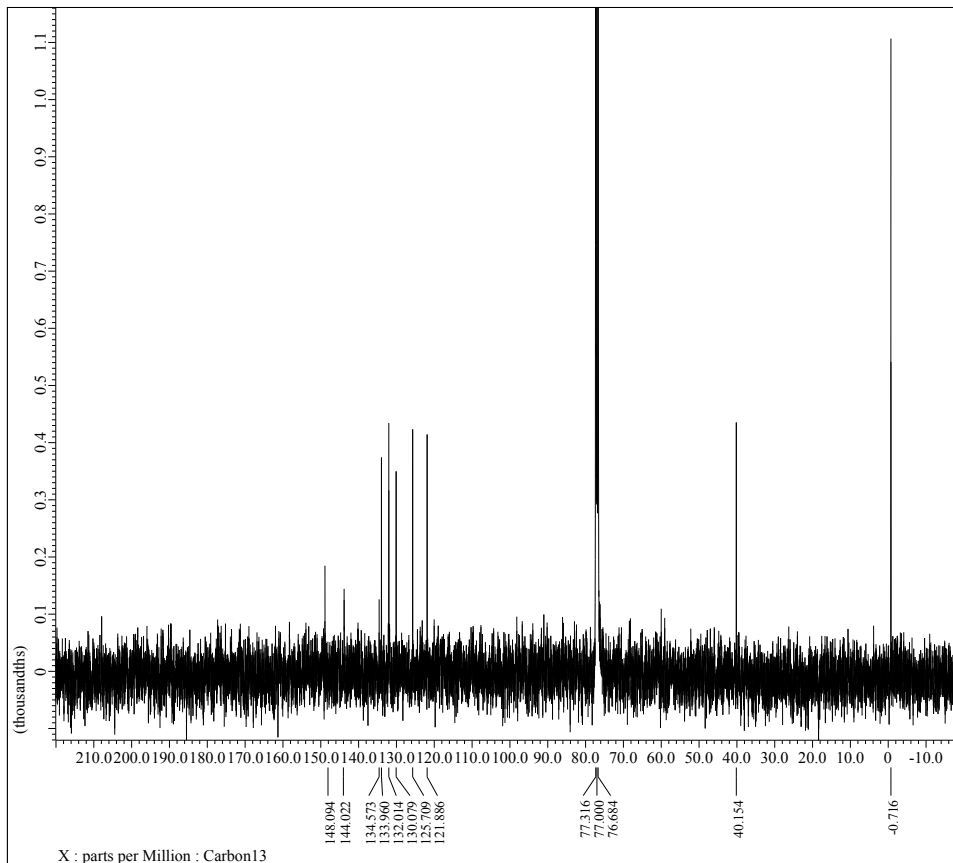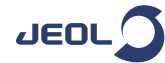

```

Filename      = sk#17-TMS_Carbon-1-2.jdf
Author       = delta
Irr_Freq     = 399.78219838 [MHz]
Experiment   = carbon.jxp
Sample_Id    = sk#17-TMS
Solvent      = CHLOROFORM-D
Comment      = single pulse decoupled gat
Data_Format  = 1D COMPLEX
Dim_Size     = 26214
X_Domain     = Carbo
Dim_Units    = [ppm]
Dimensions   = X
Spectrometer = JNM-ECZ400S/L1

Field_Strength = 9.389766 [T] (400 [MHz])
X_Acq_Duration = 1.03809024 [s]
X_Domain       = 13C
X_Freq         = 100.52530333 [MHz]
X_Offset       = 100 [ppm]
X_Points       = 32768
X_Prescans     = 4
X_Resolution   = 0.96330739 [Hz]
X_Sweep        = 31.6365655 [kHz]
X_Sweep_Clipped = 25.25252525 [kHz]
Irr_Domain     = Proton
Irr_Offset     = 5 [ppm]
Clipped        = FALSE
Scans          = 840
Total_Scans    = 840

Relaxation_Delay = 2 [s]
Recvr_Gain       = 50
Temp_Get         = 21.3 [dC]
X_90_Width       = 10.86 [us]
X_Acq_Time       = 1.03809024 [s]
X_Angle          = 30 [deg]
X_Atn            = 3.8 [dB]
X_Pulse          = 3.62 [us]
Initial_Wait     = 1 [s]
Repetition_Time = 3.03809024 [s]
  
```

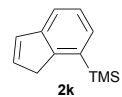

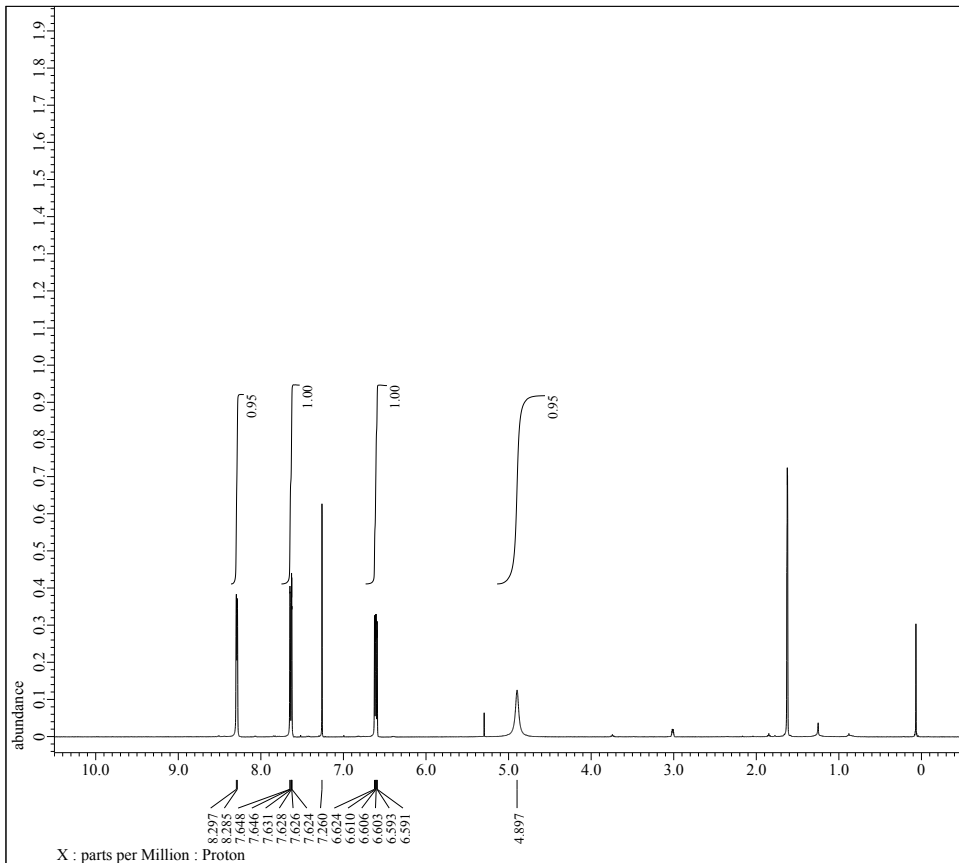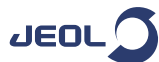

```

Filename      = sk#17-081-H_Proton-1-5.jdf
Author       = delta
Irr Freq     = 399.78219838 [MHz]
Experiment   = proton_jxp
Sample Id    = sk#17-081-H
Solvent      = CHLOROFORM-D
Comment      = single_pulse
Data Format  = 1D_COMPLEX
Dim Size     = 13107
X_Domain    = Proton
Dim Units   = [ppm]
Dimensions  = X
Spectrometer = JNM-ECZ400S/L1

Field Strength = 9.389766 [T] (400 [MHz])
X_Acq Duration = 2.18628096 [s]
X_Domain      = 1H
X_Freq       = 399.78219838 [MHz]
X_Offset     = 5 [ppm]
X_Points     = 16384
X_Prescans  = 1
X_Resolution = 0.45739775 [Hz]
X_Sweep     = 7.4940048 [kHz]
X_Sweep_Clip = 5.99520384 [kHz]
Irr_Domain   = Proton
Irr_Offset   = 5 [ppm]
Tri_Domain   = Proton
Tri_Freq    = 399.78219838 [MHz]
Tri_Offset   = 5 [ppm]
Clipped     = FALSE
Scans       = 8
Total Scans = 8

Relaxation_Delay = 5 [s]
Recvr Gain      = 23 [dc]
Temp_Get       = 6.3 [us]
X_90_Width    = 2.18628096 [s]
X_Acq Time    = 45 [deg]
X_Angle       = 0.9 [dB]
X_Pulse      = 3.15 [us]
Irr_Mode     = Off
Tri_Mode     = Off
Dante_Preset = FALSE
Initial_Wait  = 1 [s]
Repetition_Time = 7.18628096 [s]
  
```

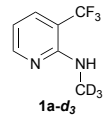

X : parts per Million : Proton

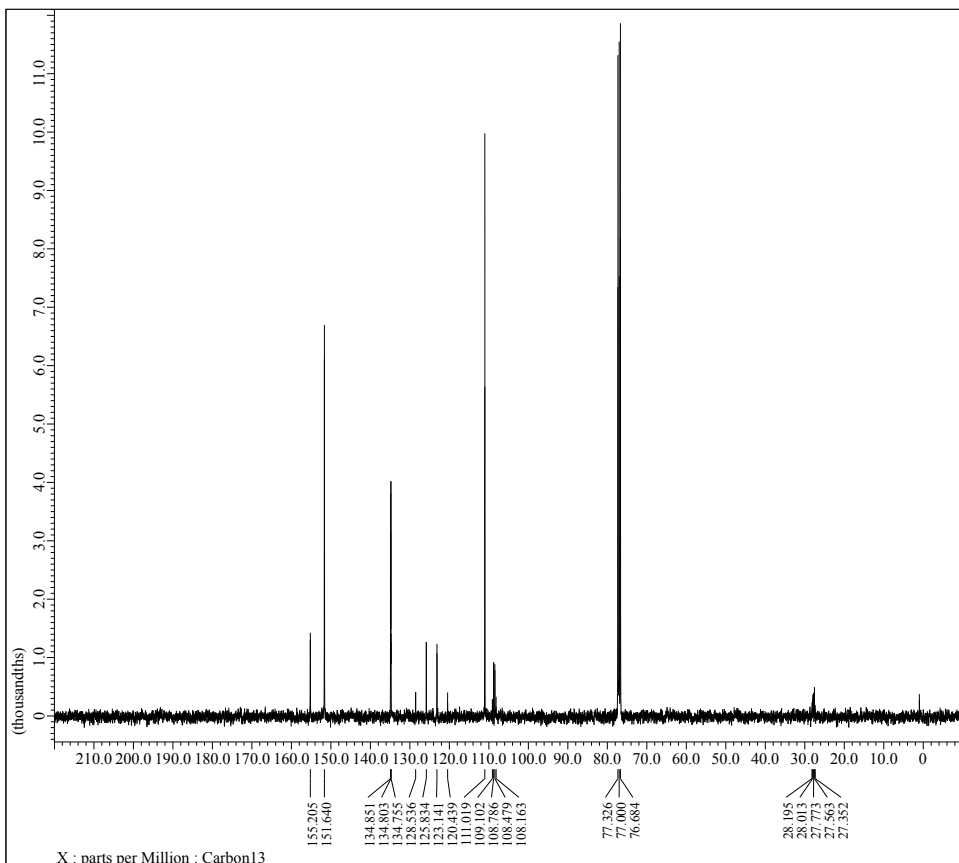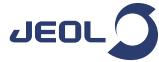

```

Filename      = sk#17-081-C_Carbon_copy3-1
Author       = delta
Irr Freq     = 399.78219838 [MHz]
Experiment   = carbon_jxp
Sample Id    = sk#17-081-C
Solvent      = CHLOROFORM-D
Comment      = single pulse decoupled gat
Data Format  = 1D_COMPLEX
Dim Size     = 26214
X_Domain    = Carbon
Dim Units   = [ppm]
Dimensions  = X
Spectrometer = JNM-ECZ400S/L1

Field Strength = 9.389766 [T] (400 [MHz])
X_Acq Duration = 0 [s]
X_Domain      = 13C
X_Freq       = 100.52530333 [MHz]
X_Offset     = 100 [ppm]
X_Points     = 32768
X_Prescans  = 4
X_Resolution = 0.96330739 [Hz]
X_Sweep     = 31.56565657 [kHz]
X_Sweep_Clip = 25.25252525 [kHz]
Irr_Domain   = Proton
Irr_Offset   = 5 [ppm]
Clipped     = FALSE
Scans       = 282
Total Scans = 282

Relaxation_Delay = 2 [s]
Recvr Gain      = 50
Temp_Get       = 23 [dc]
X_90_Width    = 10.86 [us]
X_Acq Time    = 1.03809024 [s]
X_Angle       = 30 [deg]
X_Pulse      = 3.62 [us]
Irr_Mode     = Off
Tri_Mode     = Off
Dante_Preset = FALSE
Initial_Wait  = 1 [s]
Repetition_Time = 3.03809024 [s]
  
```

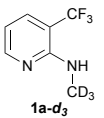

X : parts per Million : Carbon13

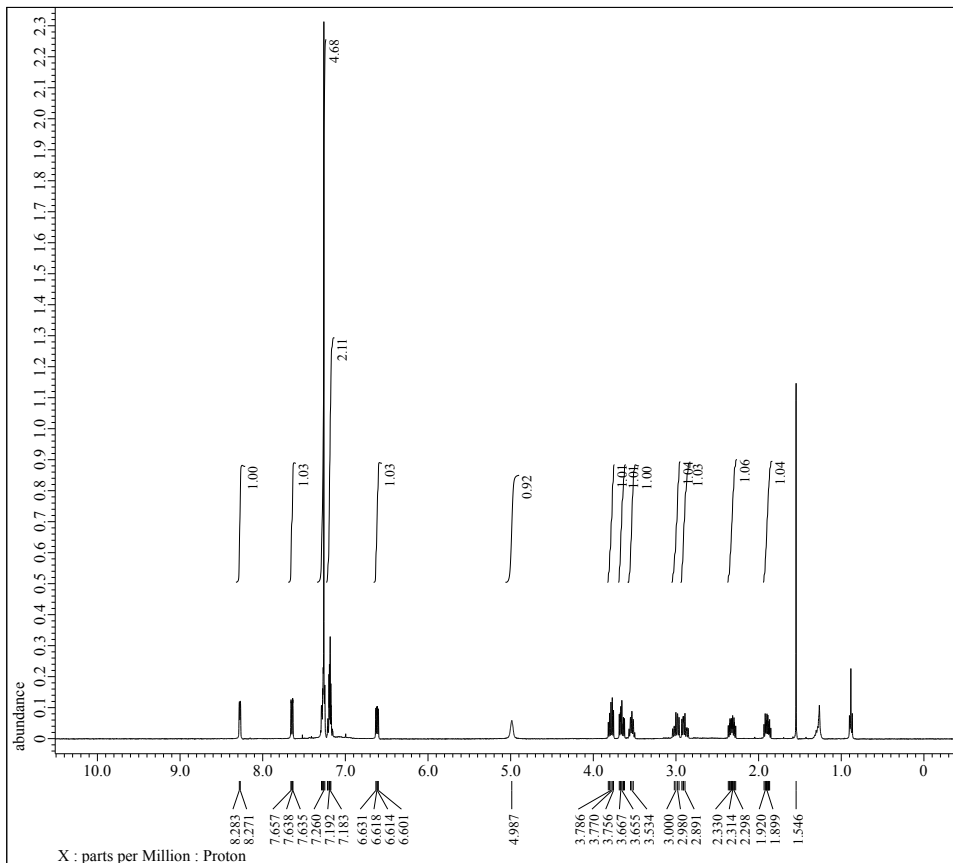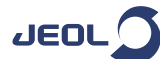

```

Filename      = 3aa-proton-1.jdf
Author       = delta
Irr_Freq     = 399.78219838 [MHz]
Experiment   = proton.jxp
Sample_Id    = sk#16-am
Solvent      = CHLOROFORM-D
Comment      = single pulse
Data Format   = 1D COMPLEX
Dim Size     = 13107
X_Domain     = Proton
Dim Units    = [ppm]
Dimensions   = X
Spectrometer = JNM-ECA400S/L1

Field Strength = 9.389766 [T] (400 [MHz])
X_Acq_Duration = 2.18628096 [s]
X_Domain       = 1H
X_Freq         = 399.78219838 [MHz]
X_Offset       = 5 [ppm]
X_Points      = 16384
X_Prescans    = 1
X_Resolution   = 0.45739775 [Hz]
X_Sweep       = 7.4940048 [kHz]
X_Sweep_Clippped = 5.98520384 [kHz]
Irr_Domain    = Proton
Irr_Offset    = 5 [ppm]
Tri_Domain    = Proton
Tri_Freq      = 399.78219838 [MHz]
Tri_Offset    = 5 [ppm]
Clipped       = FALSE
Scans         = 8
Total Scans   = 8

Relaxation_Delay = 5 [s]
Recvr Gain       = 66
Temp_Get        = 21 [dC]
X_90_Width     = 6.3 [us]
X_Acq_Time     = 2.18628096 [s]
X_Angle        = 45 [deg]
X_Atn          = 0.9 [dB]
X_Pulse        = 3.15 [us]
Irr_Mode       = Off
Tri_Mode       = Off
Danis Presat   = FALSE
Initial_Wait   = 1 [s]
Repetition_Time = 7.18628096 [s]
  
```

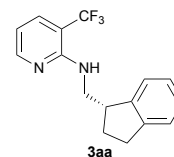

X : parts per Million : Proton

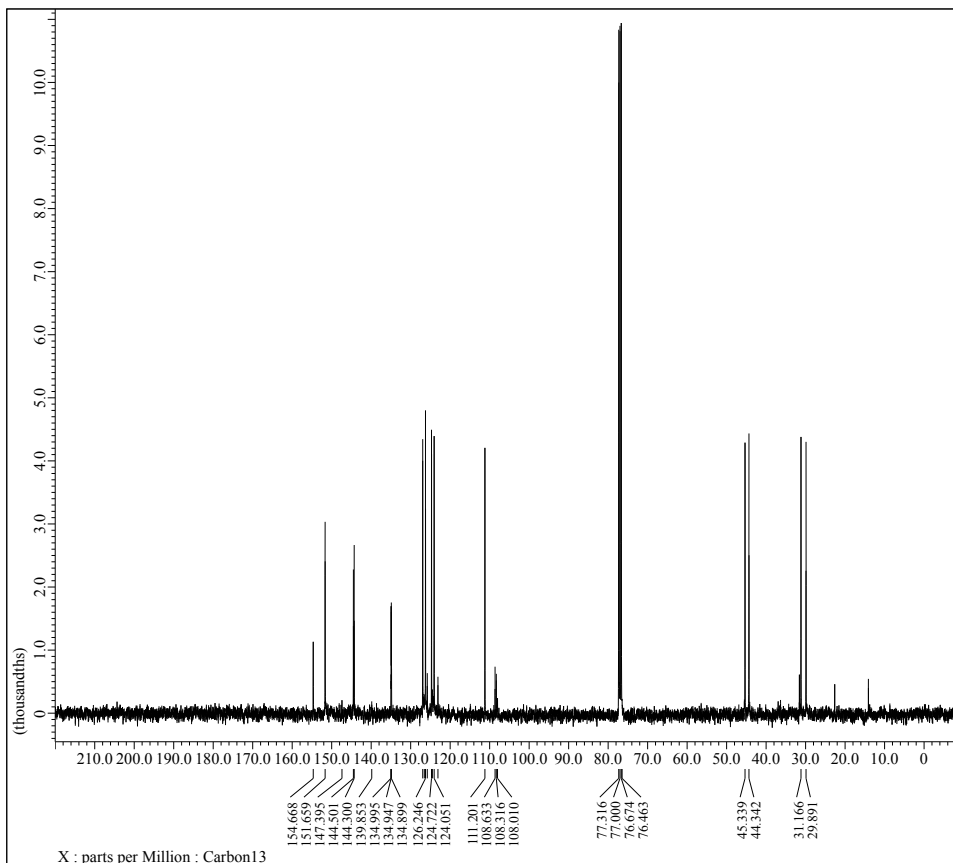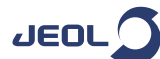

```

Filename      = 3aa-carbon-1.jdf
Author       = delta
Irr_Freq     = 399.78219838 [MHz]
Experiment   = carbon.jxp
Sample_Id    = sk#16-0xx
Solvent      = CHLOROFORM-D
Comment      = single pulse decoupled gat
Data Format   = 1D COMPLEX
Dim Size     = 26214
X_Domain     = Carbo
Dim Units    = [ppm]
Dimensions   = X
Spectrometer = JNM-ECA400S/L1

Field Strength = 9.389766 [T] (400 [MHz])
X_Acq_Duration = 1.03809024 [s]
X_Domain       = 13C
X_Freq         = 100.52530333 [MHz]
X_Offset       = 100 [ppm]
X_Points      = 32768
X_Prescans    = 4
X_Resolution   = 0.96330739 [Hz]
X_Sweep       = 31.56565657 [kHz]
X_Sweep_Clippped = 25.25252525 [kHz]
Irr_Domain    = Proton
Irr_Offset    = 5 [ppm]
Clipped       = FALSE
Scans         = 238
Total Scans   = 238

Relaxation_Delay = 2 [s]
Recvr Gain       = 50
Temp_Get        = 22.1 [dC]
X_90_Width     = 10.86 [us]
X_Acq_Time     = 1.03809024 [s]
X_Angle        = 30 [deg]
X_Atn          = 3.8 [dB]
X_Pulse        = 3.62 [us]
Initial_Wait   = 1 [s]
Repetition_Time = 3.03809024 [s]
  
```

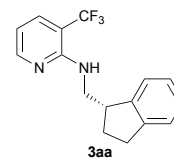

X : parts per Million : Carbon13

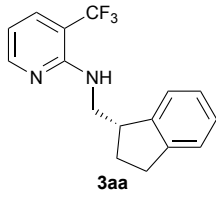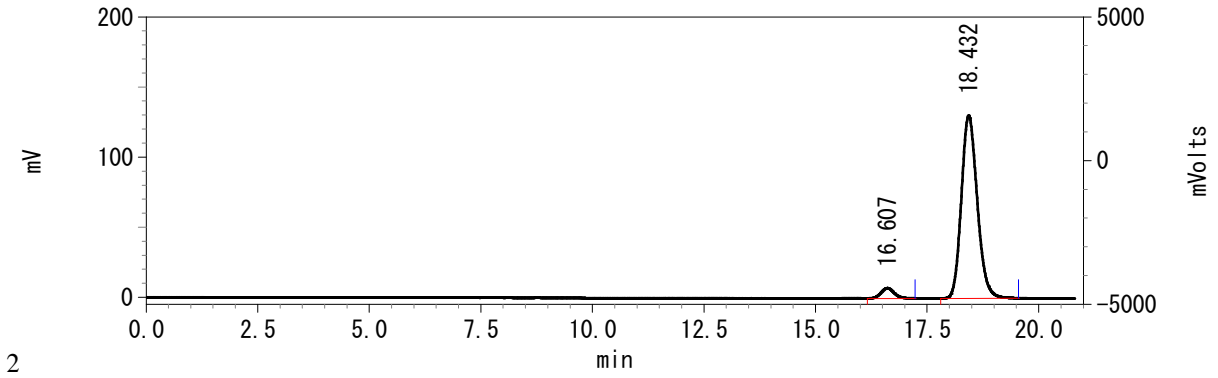

| Pk # | Retention Time | Area    | Area Percent |
|------|----------------|---------|--------------|
| 1    | 16.607         | 149004  | 4.411        |
| 2    | 18.432         | 3229208 | 95.589       |

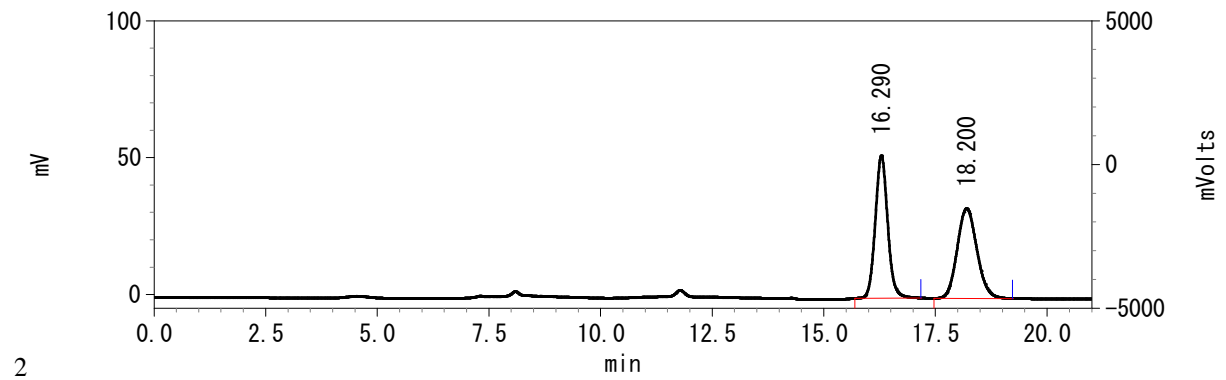

| Pk # | Retention Time | Area    | Area Percent |
|------|----------------|---------|--------------|
| 1    | 16.290         | 1007032 | 49.980       |
| 2    | 18.200         | 1007831 | 50.020       |

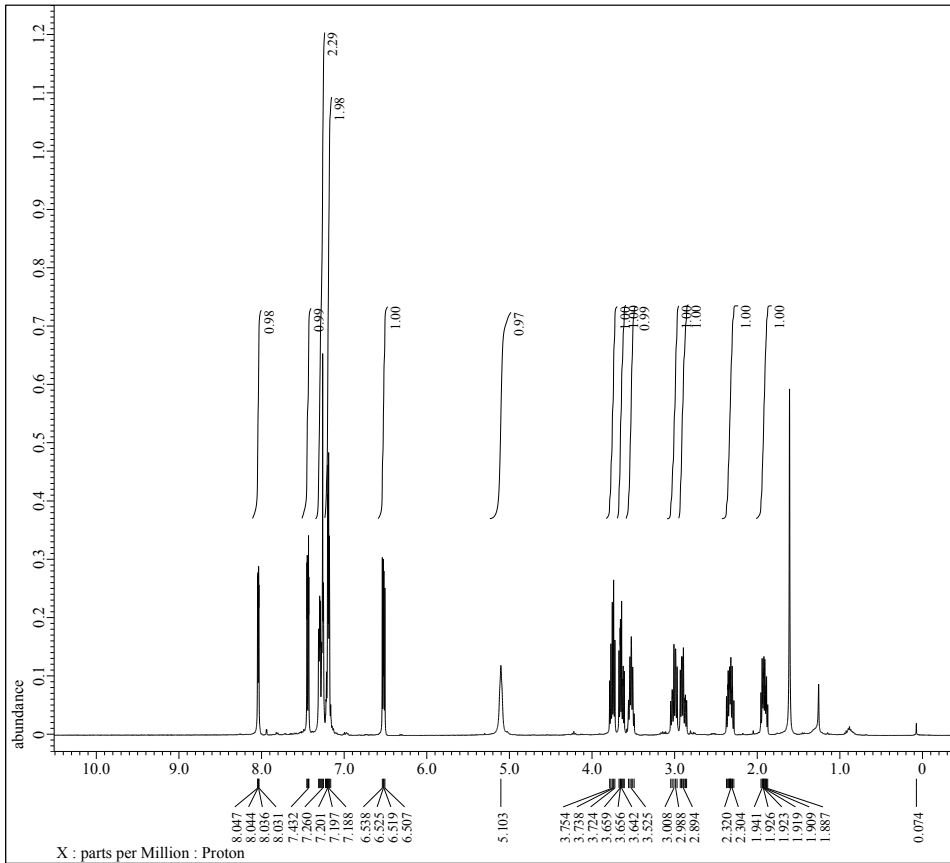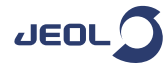

```

Filename      = sk#15-050-1_Proton-1-5.jdf
Author       = delta
Irr_Freq     = 399.78219838 [MHz]
Experiment   = proton.jxp
Sample_Id    = sk#15-050-1
Solvent      = CHLOROFORM-D
Comment      = single pulse
Data_Format  = 1D COMPLEX
Dim_Size     = 13107
X_Domain     = Proton
Dim_Units    = [ppm]
Dimensions   = X
Spectrometer = JNM-ECZ400S/L1

Field_Strength = 9.389766 [T] (400 [MHz])
X_Acq_Duration = 2.18628096 [s]
X_Domain       = 1H
X_Freq         = 399.78219838 [MHz]
X_Offset       = 5 [ppm]
X_Points      = 16384
X_Prescans    = 1
X_Resolution  = 0.45739775 [Hz]
X_Sweep       = 7.4940048 [kHz]
X_Sweep_Clipped = 5.99520384 [kHz]
Irr_Domain    = Proton
Irr_Offset    = 5 [ppm]
Tri_Domain    = Proton
Tri_Freq      = 399.78219838 [MHz]
Tri_Offset    = 5 [ppm]
Clipped       = FALSE
Scans         = 8
Total_Scans   = 8

Relaxation_Delay = 5 [s]
Recvr_Gain       = 46
Temp_Get         = 21.2 [dC]
X_90_Width      = 6.3 [us]
X_Acq_Time      = 2.18628096 [s]
X_Angle         = 45 [deg]
X_Atn           = 0.9 [dB]
X_Pulse         = 3.15 [us]
Irr_Mode        = Off
Tri_Mode        = Off
Data_Preset     = FALSE
Initial_Wait    = 1 [s]
Repetition_Time = 7.18628096 [s]
  
```

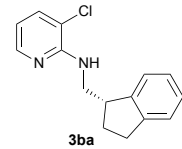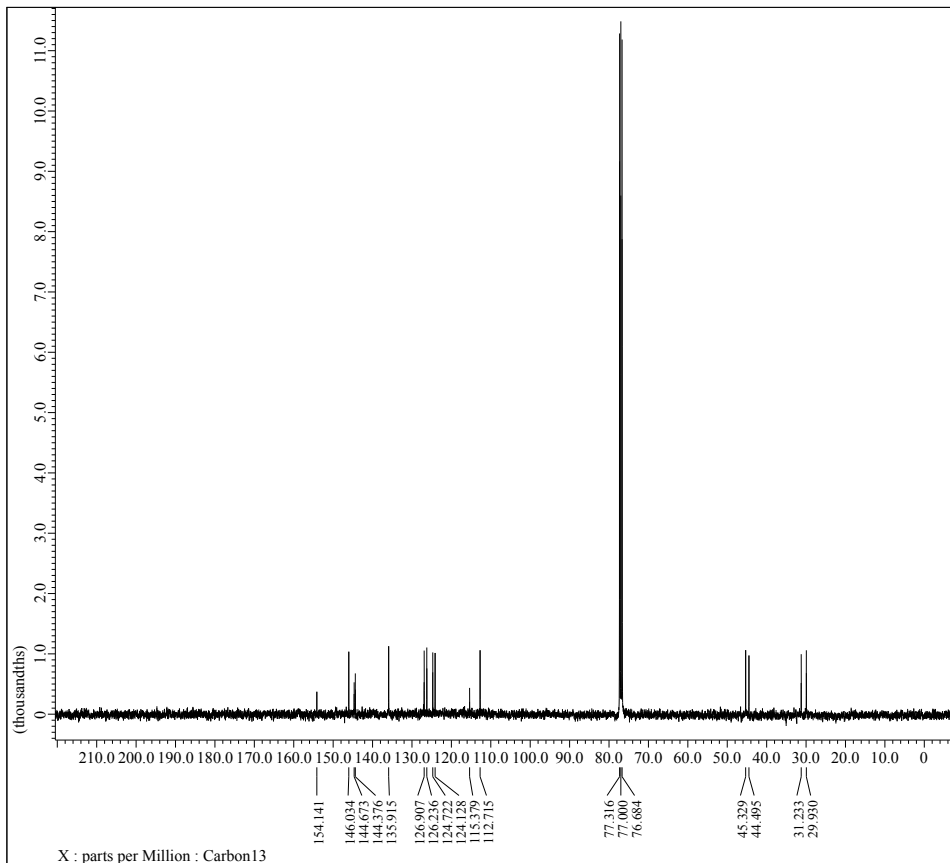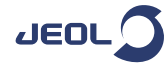

```

Filename      = sk#15-050-1_Carbon-1-5.jdf
Author       = delta
Irr_Freq     = 399.78219838 [MHz]
Experiment   = carbon.jxp
Sample_Id    = sk#15-050-1
Solvent      = CHLOROFORM-D
Comment      = single pulse decoupled gat
Data_Format  = 1D COMPLEX
Dim_Size     = 26214
X_Domain     = Carbo
Dim_Units    = [ppm]
Dimensions   = X
Spectrometer = JNM-ECZ400S/L1

Field_Strength = 9.389766 [T] (400 [MHz])
X_Acq_Duration = 1.03809024 [s]
X_Domain       = 13C
X_Freq         = 100.52530333 [MHz]
X_Offset       = 100 [ppm]
X_Points      = 32768
X_Prescans    = 4
X_Resolution  = 0.96330739 [Hz]
X_Sweep       = 31.56565657 [kHz]
X_Sweep_Clipped = 25.25252525 [kHz]
Irr_Domain    = Proton
Irr_Offset    = 5 [ppm]
Clipped       = FALSE
Scans         = 477
Total_Scans   = 477

Relaxation_Delay = 2 [s]
Recvr_Gain       = 50
Temp_Get         = 21.3 [dC]
X_90_Width      = 10.86 [us]
X_Acq_Time      = 1.03809024 [s]
X_Angle         = 30 [deg]
X_Atn           = 3.8 [dB]
X_Pulse         = 3.62 [us]
Initial_Wait    = 1 [s]
Repetition_Time = 3.03809024 [s]
  
```

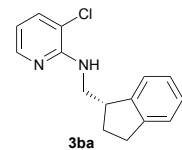



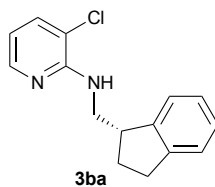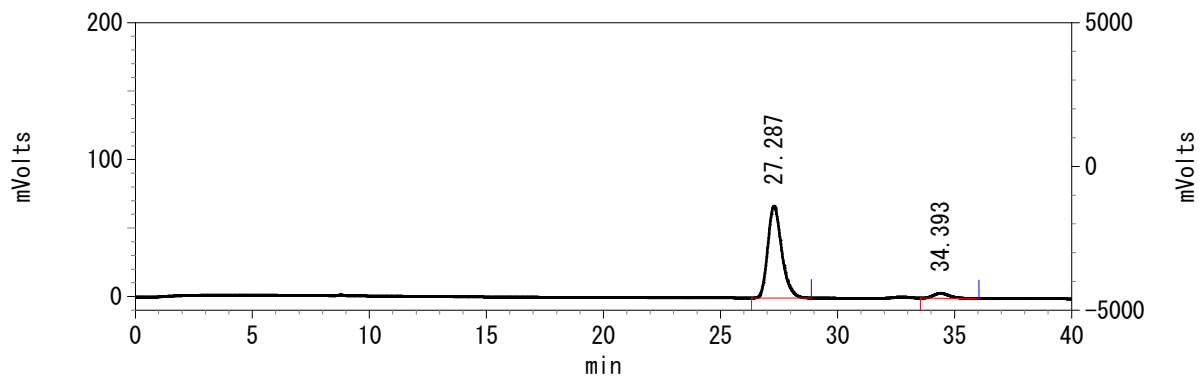

| Pk # | Retention Time | Area    | Area Percent |
|------|----------------|---------|--------------|
| 1    | 27.287         | 2777261 | 93.997       |
| 2    | 34.393         | 177365  | 6.003        |

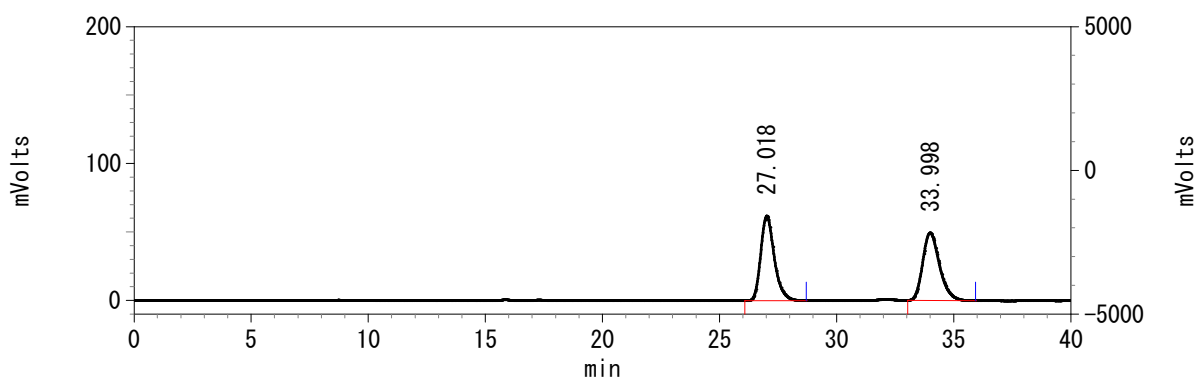

| Pk # | Retention Time | Area    | Area Percent |
|------|----------------|---------|--------------|
| 1    | 27.018         | 2502256 | 50.289       |
| 2    | 33.998         | 2473479 | 49.711       |

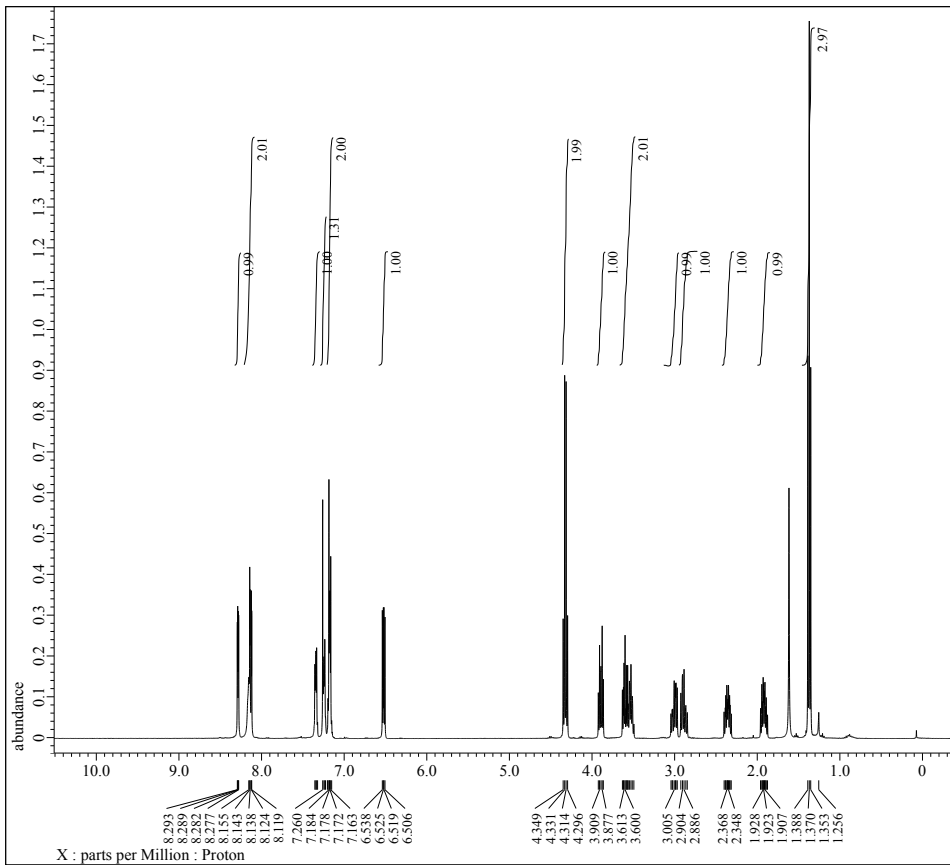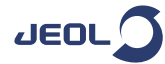

```

Filename      = sk#15-050-2_Proton-1-5.jdf
Author       = delta
Irr Freq     = 399.78219838 [MHz]
Experiment   = proton.jxp
Sample Id    = sk#15-050-2
Solvent      = CHLOROFORM-D
Comment      = single pulse
Data Format   = 1D COMPLEX
Dim Size     = 13107
X Domain     = Proton
X Offset     = 5 [ppm]
X Points     = 16384
X Fscans     = 1
X Resolution = 0.45739775 [Hz]
X Sweep     = 7.4940048 [kHz]
X Swept Clipped = 5.99520384 [kHz]
Irr Domain   = Proton
Irr Offset   = 5 [ppm]
Tri Domain   = Proton
Tri Freq     = 399.78219838 [MHz]
Tri Offset   = 5 [ppm]
Clipped     = FALSE
Scans       = 8
Total Scans = 8

Relaxation_Delay = 5 [s]
Recvr Gain       = 46
Temp Get        = 21.3 [dC]
X_90_Width     = 6.3 [us]
X_Acq Time     = 2.18628096 [s]
X_Angle        = 45 [deg]
X_Atn         = 0.9 [dB]
X_Pulse       = 3.15 [us]
Irr Mode      = Off
Tri Mode      = Off
DANTE Presat  = FALSE
Initial Wait   = 1 [s]
Repetition Time = 7.18628096 [s]
  
```

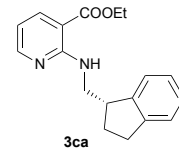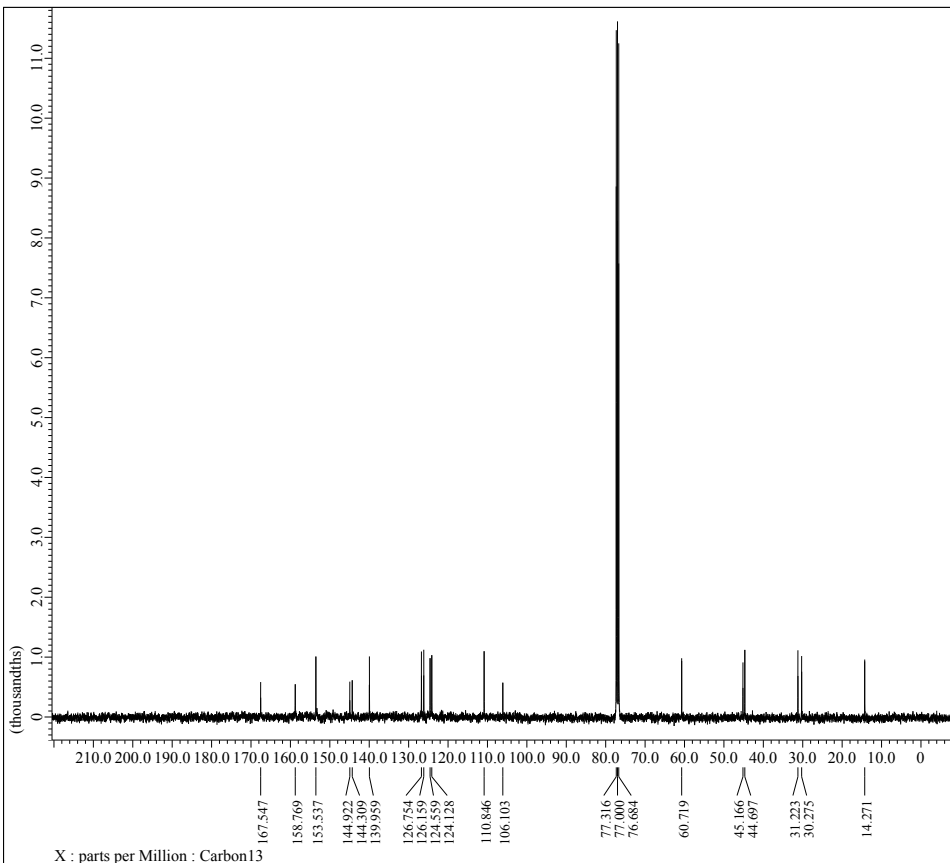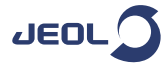

```

Filename      = sk#15-050-2_Carbon-1-4.jdf
Author       = delta
Irr Freq     = 399.78219838 [MHz]
Experiment   = carbon.jxp
Sample Id    = sk#15-050-2
Solvent      = CHLOROFORM-D
Comment      = single pulse decoupled gat
Data Format   = 1D COMPLEX
Dim Size     = 26214
X Domain     = Carbo
X Offset     = [ppm]
Dimensions   = X
Spectrometer = JNM-ECZ400S/L1

Field Strength = 9.389766 [T] (400 [MHz])
X_Acq Duration = 1.03809024 [s]
X Domain       = 13C
X Freq        = 100.52530333 [MHz]
X Offset      = 100 [ppm]
X Points      = 32768
X Fscans      = 4
X Resolution  = 0.96330739 [Hz]
X Sweep      = 31.56565657 [kHz]
X Swept Clipped = 25.25252525 [kHz]
Irr Domain    = Proton
Irr Offset    = 5 [ppm]
Clipped      = FALSE
Scans        = 516
Total Scans  = 516

Relaxation_Delay = 2 [s]
Recvr Gain       = 50
Temp Get        = 21.4 [dC]
X_90_Width     = 10.86 [us]
X_Acq Time     = 1.03809024 [s]
X_Angle        = 30 [deg]
X_Atn         = 3.8 [dB]
X_Pulse       = 3.62 [us]
Initial Wait   = 1 [s]
Repetition Time = 3.03809024 [s]
  
```

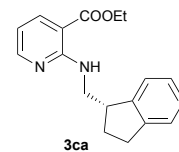

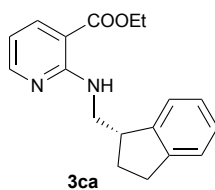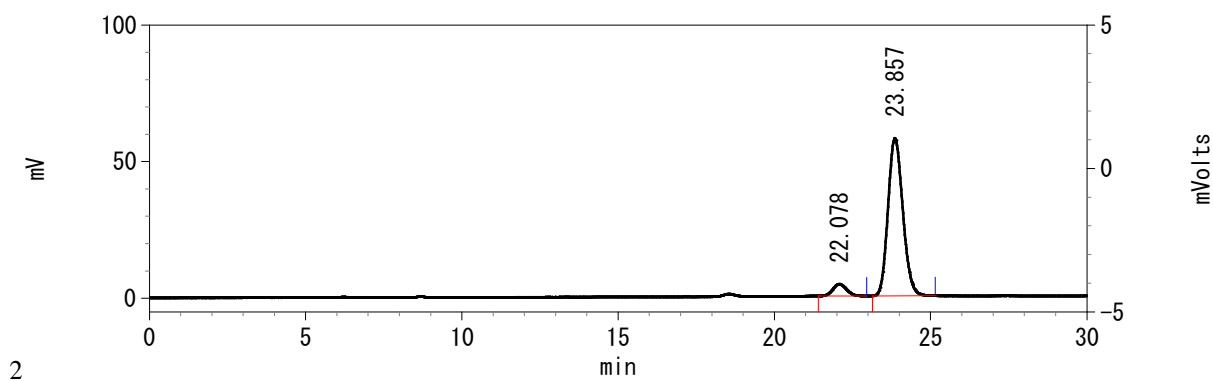

2

| Pk # | Retention Time | Area    | Area Percent |
|------|----------------|---------|--------------|
| 1    | 22.078         | 134201  | 6.586        |
| 2    | 23.857         | 1903380 | 93.414       |

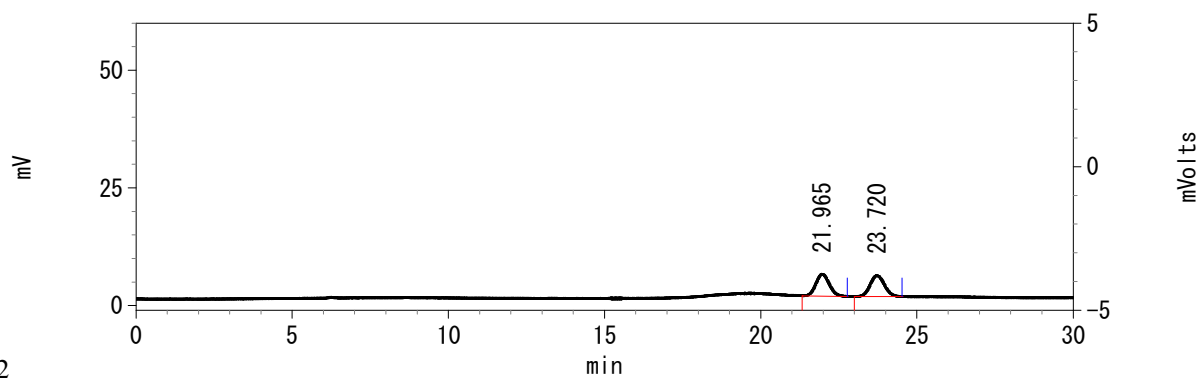

2

| Pk # | Retention Time | Area   | Area Percent |
|------|----------------|--------|--------------|
| 1    | 21.965         | 138424 | 49.132       |
| 2    | 23.720         | 143313 | 50.868       |

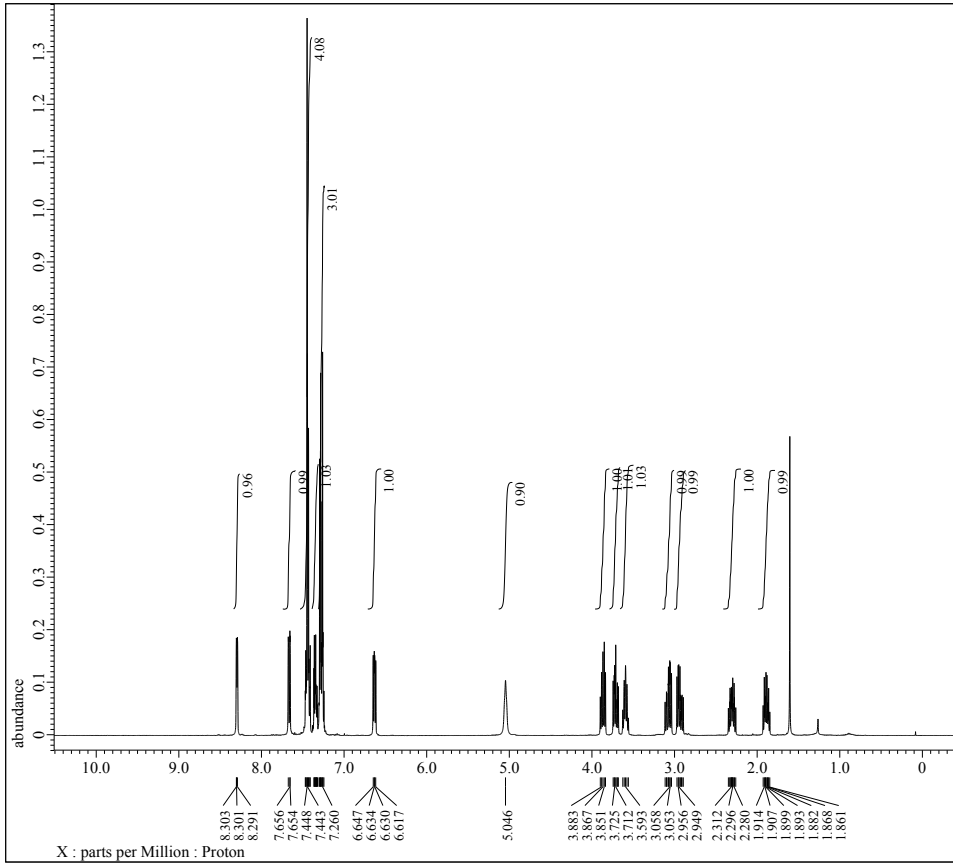

X : parts per Million : Proton

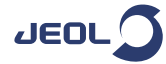

```

Filename      = 3ab-proton-1.jdf
Author       = delta
Irr_Freq     = 399.78219838 [MHz]
Experiment   = proton.jxp
Sample_Id    = tn30-22-2
Solvent      = CHLOROFORM-D
Comment      = single pulse
Data Format   = 1D COMPLEX
Dim Size     = 13107
X_Domain     = Proton
Dim Units    = [ppm]
Dimensions   = X
Spectrometer = JNM-EZ400S/L1

Field Strength = 9.389766 [T] (400 [MHz])
X_Acq_Duration = 2.18628096 [s]
X_Domain       = 1H
X_Freq         = 399.78219838 [MHz]
X_Offset       = 5 [ppm]
X_Points      = 16384
X_Prescans    = 1
X_Resolution  = 0.45739775 [Hz]
X_Sweep       = 7.4940048 [kHz]
X_Sweep_Clipped = 5.99520384 [kHz]
Irr_Domain    = Proton
Irr_Offset    = 5 [ppm]
Tri_Domain    = Proton
Tri_Freq      = 399.78219838 [MHz]
Tri_Offset    = 5 [ppm]
Clipped       = FALSE
Scans         = 8
Total Scans   = 8

Relaxation_Delay = 5 [s]
Recvr Gain       = 56
Temp_Get        = 20.6 [dc]
X_90_Width     = 6.6 [us]
X_Acq_Time     = 2.18628096 [s]
X_Angle        = 45 [deg]
X_Atn          = 0.9 [db]
X_Pulse        = 3.3 [us]
Irr_Mode       = Off
Tri_Mode       = Off
Dante_Preset   = FALSE
Initial_Wait    = 1 [s]
Repetition_Time = 7.18628096 [s]
  
```

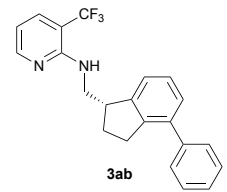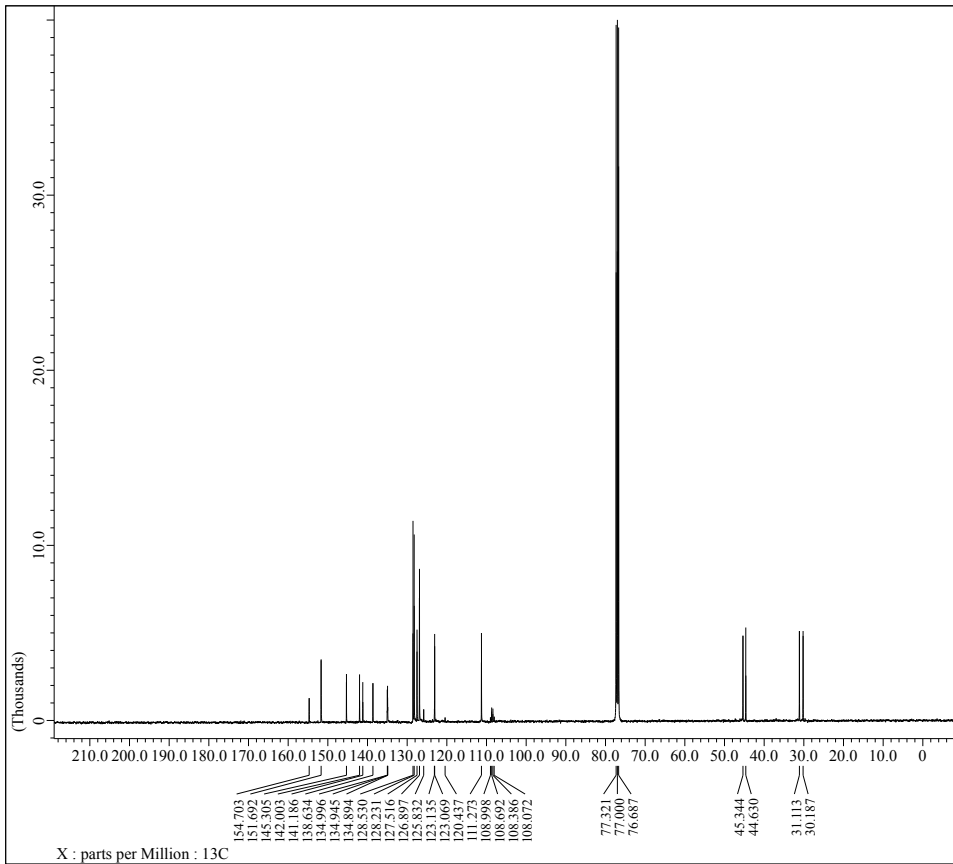

X : parts per Million : 13C

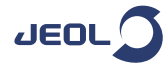

```

Filename      = sk#14-100_10-2.jdf
Author       = FOC
Experiment   = zpgg30
Sample_Id    = Parameter file, TOPSPIN
Solvent      = CHLOROFORM-D
Comment      = Parameter file, TOPSPIN
Data Format   = 1D COMPLEX
Dim Size     = 32768
X_Domain     = 13C
Dim Units    = [ppm]
Dimensions   = X
Spectrometer = BRUKER DMX NMR

Field Strength = 9.39793489 [T] (400 [MHz])
X_Domain       = 13C
X_Freq         = 100.61276853 [MHz]
X_Offset       = 10.06080281 [kHz]
X_Points      = 32768
X_Prescans    = 1
X_Sweep       = 24.03605805 [kHz]
Scans         = 3000
Temp_Get      = 298.6604 [K]
  
```

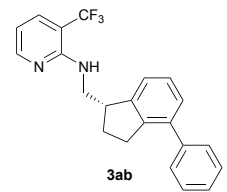

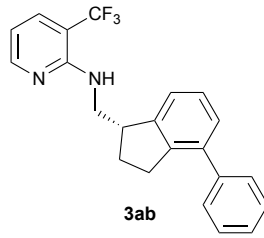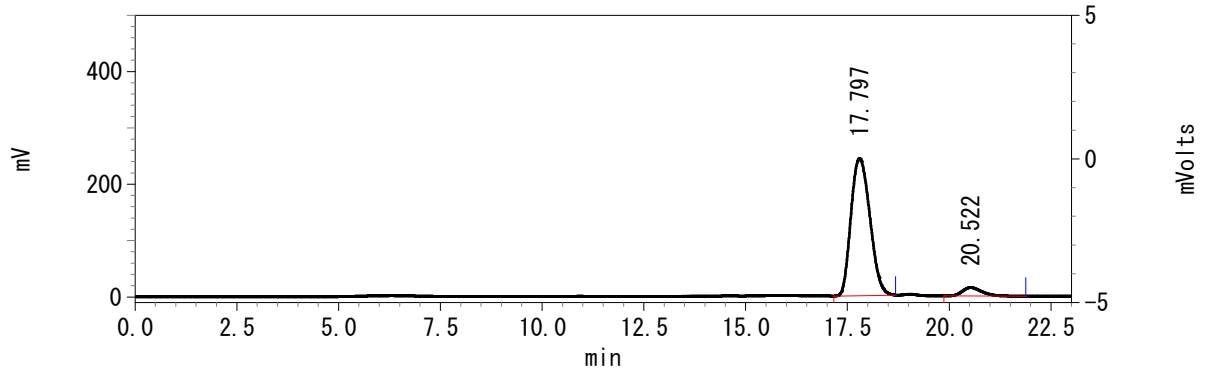

| Pk # | Retention Time | Area    | Area Percent |
|------|----------------|---------|--------------|
| 1    | 17.797         | 7894415 | 94.004       |
| 2    | 20.522         | 503580  | 5.996        |

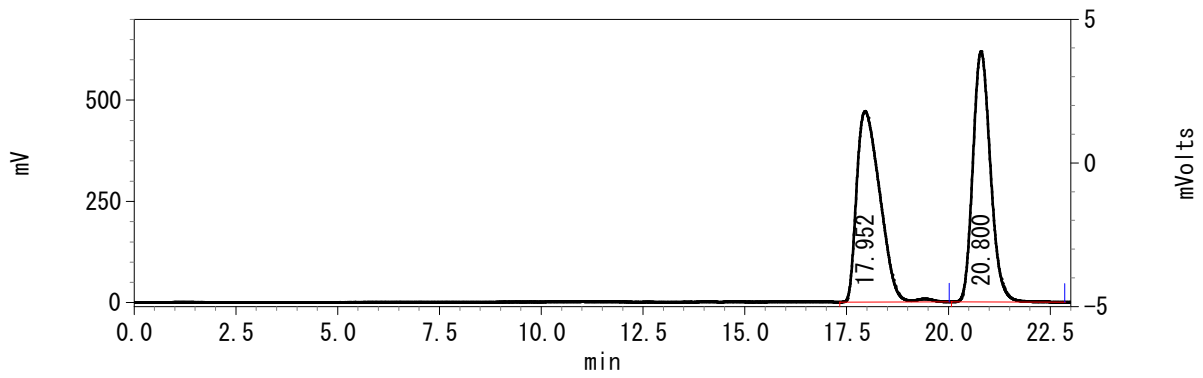

| Pk # | Retention Time | Area     | Area Percent |
|------|----------------|----------|--------------|
| 1    | 17.952         | 18776782 | 50.244       |
| 2    | 20.800         | 18594506 | 49.756       |

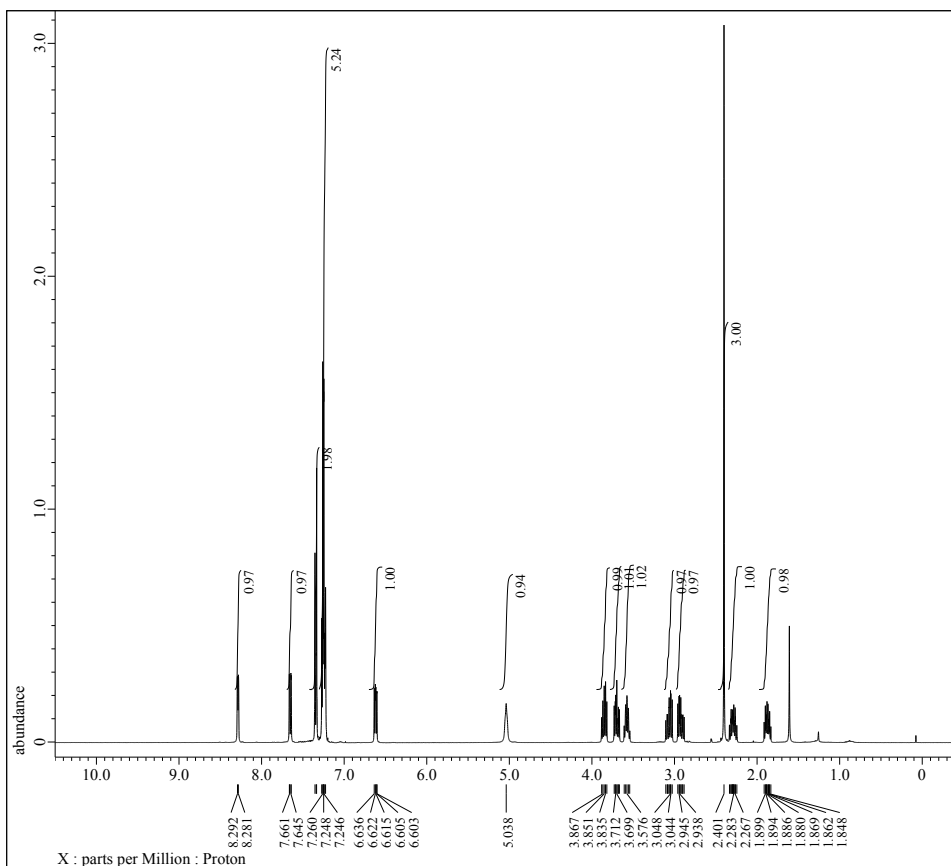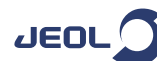

```

Filename      = 3ac-proton-1.jdf
Author        = delta
Irr_Freq      = 399.78219838[MHz]
Experiment    = proton.jxp
Sample_Id     = tn30-23-1
Solvent       = CHLOROFORM-D
Comment       = single_pulse
Data_Format   = 1D COMPLEX
Dim_Size      = 13107
X_Domain      = Proto
Dim_Units     = [ppm]
Dimensions    = X
Spectrometer  = JNM-EZ400S/L1

Field_Strength = 9.389766[T] (400[MHz])
X_Acq_Duration = 2.18628096[s]
X_Domain       = 1H
X_Freq         = 399.78219838[MHz]
X_Offset       = 5[ppm]
X_Points      = 16384
X_Prescans    = 1
X_Resolution  = 0.45739775[Hz]
X_Sweep       = 7.4940048[kHz]
X_Sweep_Clipped = 5.99520384[kHz]
Irr_Domain    = Proton
Irr_Offset    = 5[ppm]
Tri_Domain    = Proton
Tri_Freq      = 399.78219838[MHz]
Tri_Offset    = 5[ppm]
Clipped       = FALSE
Scans         = 8
Total_Scans   = 8

Relaxation_Delay = 5[s]
Recvr_Gain       = 56
Temp_Get         = 20.9[dc]
X_90_Width      = 6.6[us]
X_Acq_Time      = 2.18628096[s]
X_Angle         = 45[deg]
X_Atn           = 0.9[db]
X_Pulse         = 3.3[us]
Irr_Mode        = Off
Tri_Mode        = Off
Danle_Preset   = FALSE
Initial_Wait    = 1[s]
Repetition_Time = 7.18628096[s]
  
```

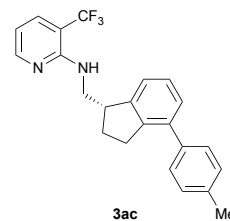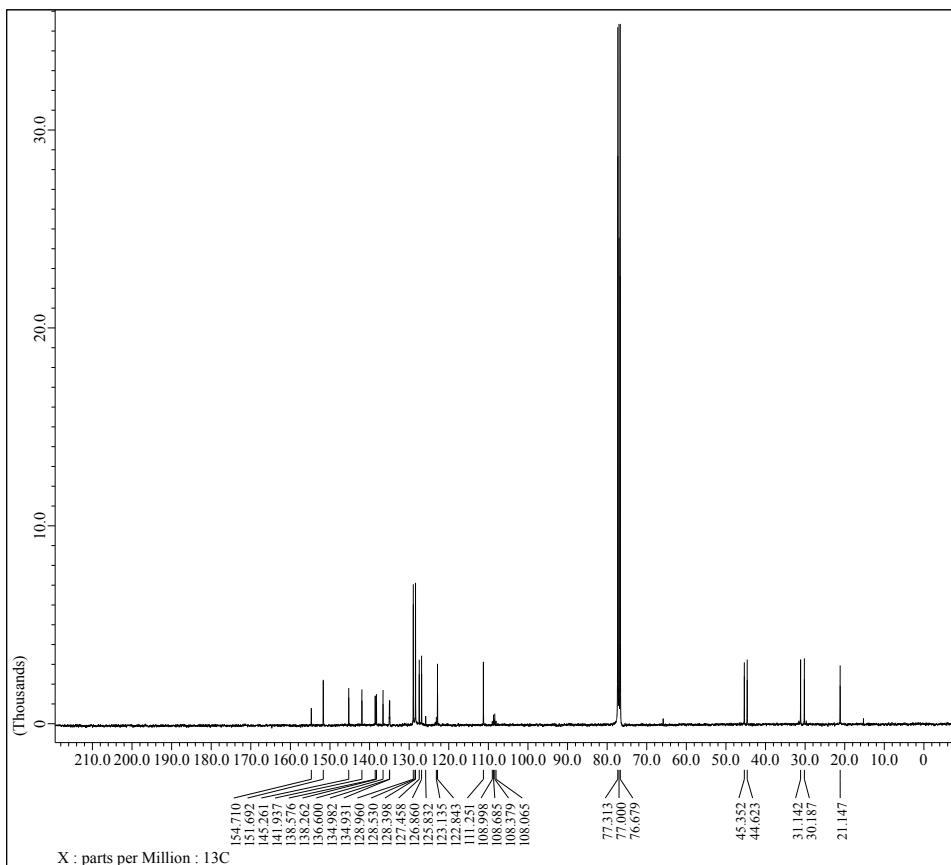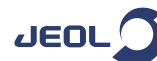

```

Filename      = sk#15-004_10-2.jdf
Author        = FOC
Experiment    = xpgg30
Sample_Id     = Parameter file, TOPSPIN
Solvent       = CHLOROFORM-D
Comment       = Parameter file, TOPSPIN
Data_Format   = 1D COMPLEX
Dim_Size      = 32768
X_Domain      = 13C
Dim_Units     = [ppm]
Dimensions    = X
Spectrometer  = BRUKER_DMX_NMR

Field_Strength = 9.39793489[T] (400[MHz])
X_Domain       = 13C
X_Freq         = 100.61276853[MHz]
X_Offset       = 10.06080281[kHz]
X_Points      = 32768
X_Prescans    = 1
X_Sweep       = 24.03605805[kHz]
Scans         = 3000

Temp_Get       = 299.4109[K]
  
```

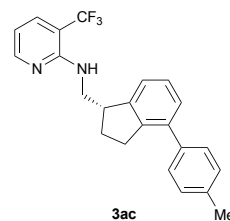

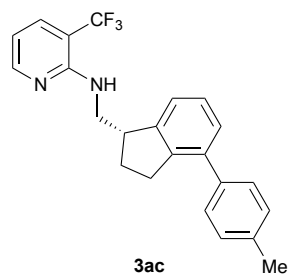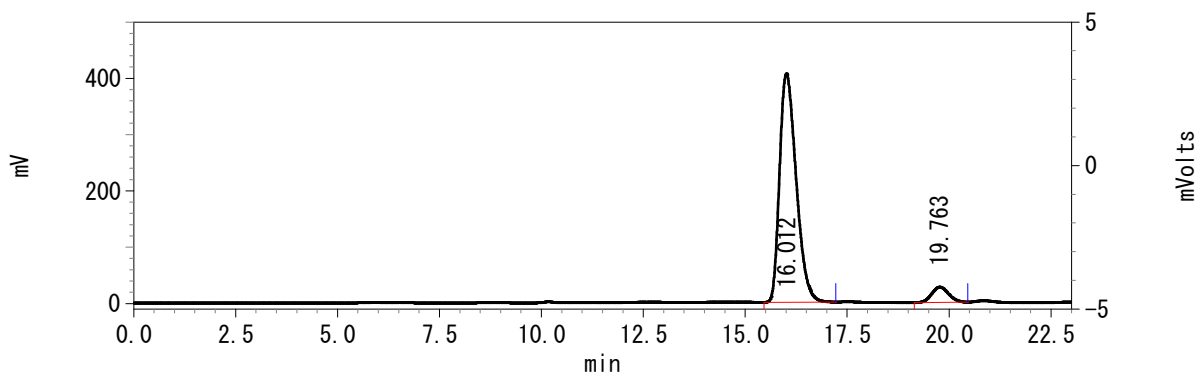

| Pk # | Retention Time | Area     | Area Percent |
|------|----------------|----------|--------------|
| 1    | 16.012         | 11488774 | 93.616       |
| 2    | 19.763         | 783515   | 6.384        |

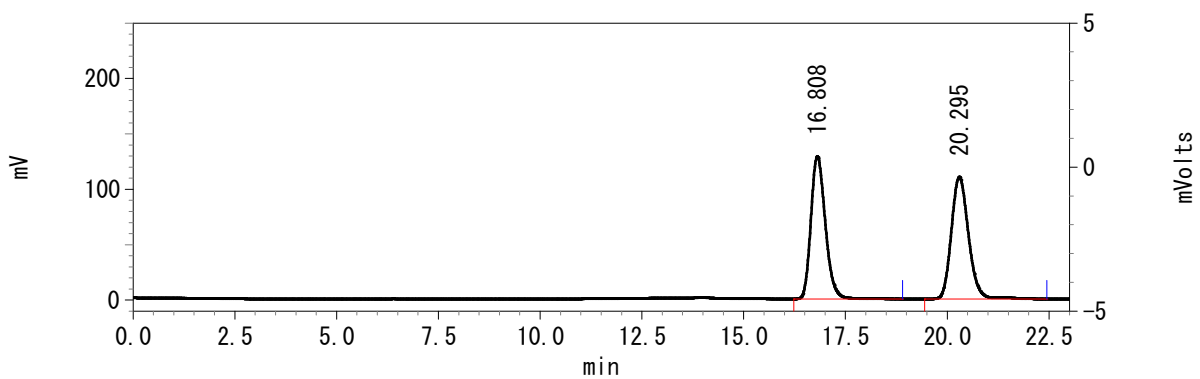

| Pk # | Retention Time | Area    | Area Percent |
|------|----------------|---------|--------------|
| 1    | 16.808         | 3177575 | 49.625       |
| 2    | 20.295         | 3225662 | 50.375       |

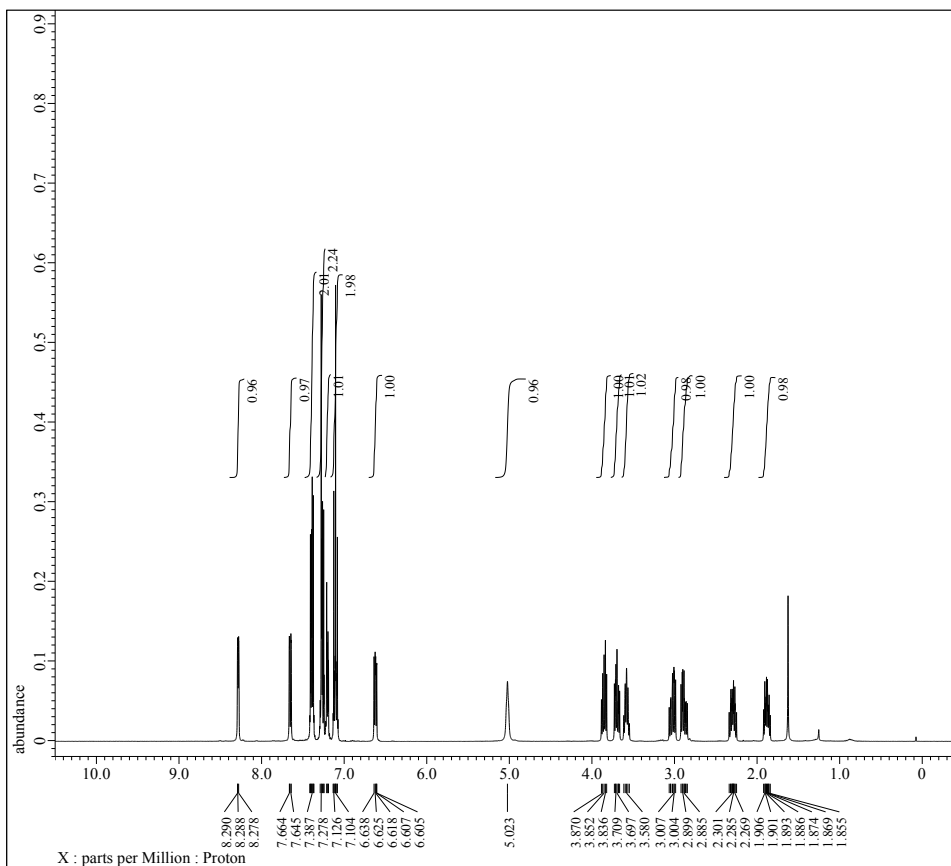

X : parts per Million : Proton

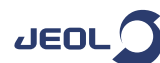

```

Filename      = 3ad-proton-1.jdf
Author       = delta
Irr Freq     = 399.78219838 [MHz]
Experiment   = proton_jxp
Sample Id    = tn30-27-1
Solvent      = CHLOROFORM-D
Comment      = single pulse
Data Format  = 1D COMPLEX
Dim Size     = 13107
X Domain    = Proto
Dim Units   = [ppm]
Dimensions  = X
Spectrometer = JNM-ECZ400S/L1

Field Strength = 9.389766 [T] (400 [MHz])
X Acq Duration = 2.18628096 [s]
X Domain       = 1H
X Freq        = 399.78219838 [MHz]
X Offset      = 5 [ppm]
X Points      = 16384
X Prescans    = 1
X Resolution  = 0.45739775 [Hz]
X Sweep       = 7.4940048 [kHz]
X Sweep Clipped = 5.99520384 [kHz]
Irr Domain    = Proton
Irr Offset    = 5 [ppm]
Tri Domain    = Proton
Tri Freq      = 399.78219838 [MHz]
Tri Offset    = 5 [ppm]
Clipped       = FALSE
Scans         = 8
Total Scans   = 8

Relaxation Delay = 5 [s]
Recvr Gain      = 46
Temp Get       = 20.9 [dC]
X 90 Width     = 6.6 [us]
X Acq Time     = 2.18628096 [s]
X Angle        = 45 [deg]
X Att          = 0.9 [dB]
X Pulse        = 3.3 [us]
Irr Mode       = Off
Tri Mode       = Off
Danke Preat   = FALSE
Initial Wait   = 1 [s]
Repetition Time = 7.18628096 [s]
  
```

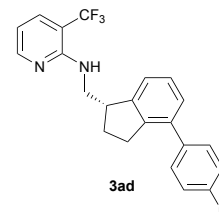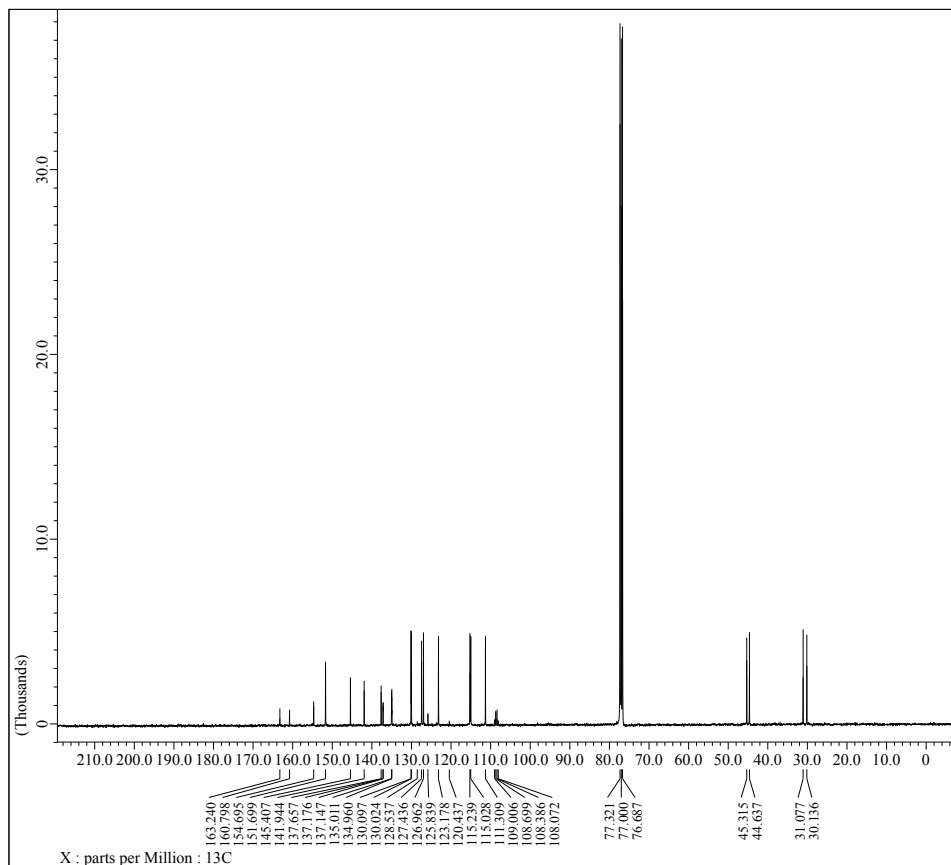

X : parts per Million : 13C

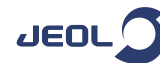

```

Filename      = sk#15-005_20-2.jdf
Author       = FOC
Experiment   = sgg30
Sample Id    = Parameter file, TOPSPIN
Solvent      = CHLOROFORM-D
Comment      = Parameter file, TOPSPIN
Data Format  = 1D COMPLEX
Dim Size     = 32768
X Domain    = 13C
Dim Units   = [ppm]
Dimensions  = X
Spectrometer = BRUKER DMX NMR

Field Strength = 9.39793489 [T] (400 [MHz])
X Domain       = 13C
X Freq        = 100.61276853 [MHz]
X Offset      = 10.06080281 [kHz]
X Points      = 32768
X Prescans    = 1
X Sweep       = 24.03605805 [kHz]
Scans         = 3000
Temp Get      = 299.2421 [K]
  
```

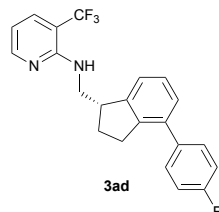



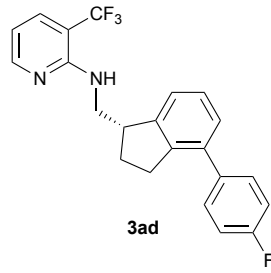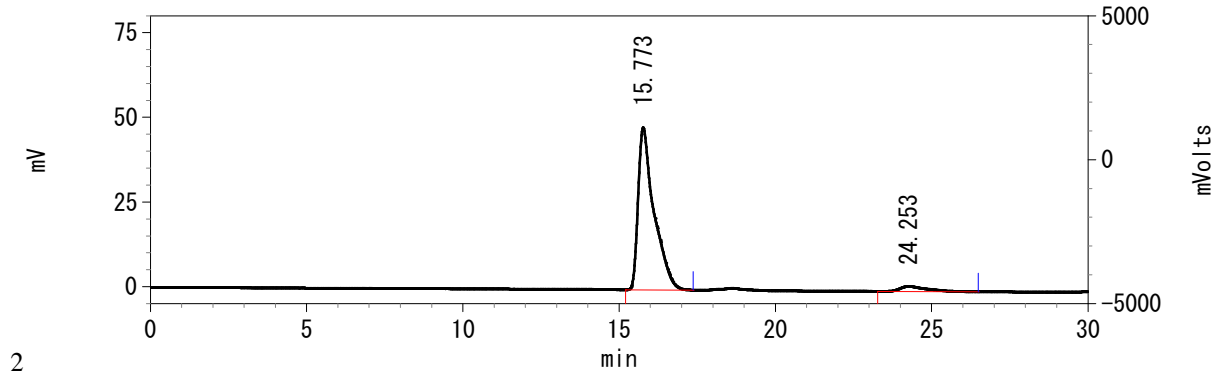

| Pk # | Retention Time | Area    | Area Percent |
|------|----------------|---------|--------------|
| 1    | 15.773         | 1692724 | 94.885       |
| 2    | 24.253         | 91259   | 5.115        |

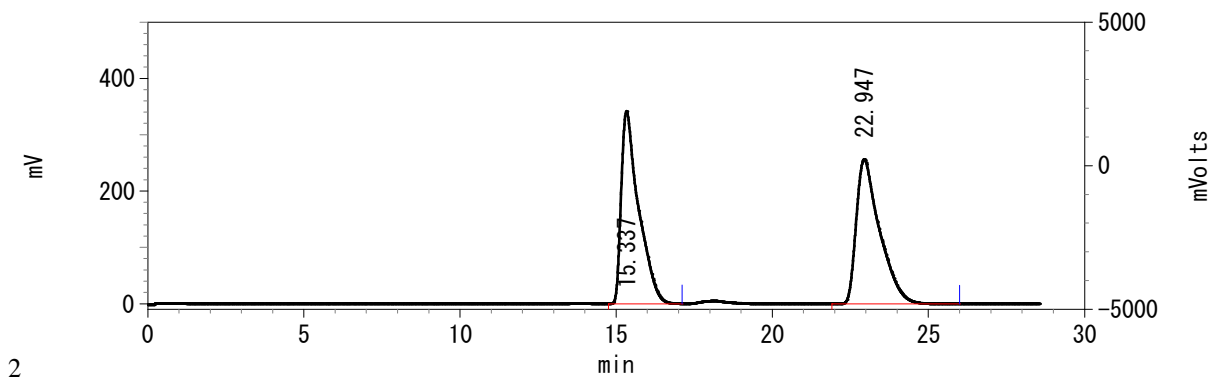

| Pk # | Retention Time | Area     | Area Percent |
|------|----------------|----------|--------------|
| 1    | 15.337         | 13242652 | 49.729       |
| 2    | 22.947         | 13386789 | 50.271       |

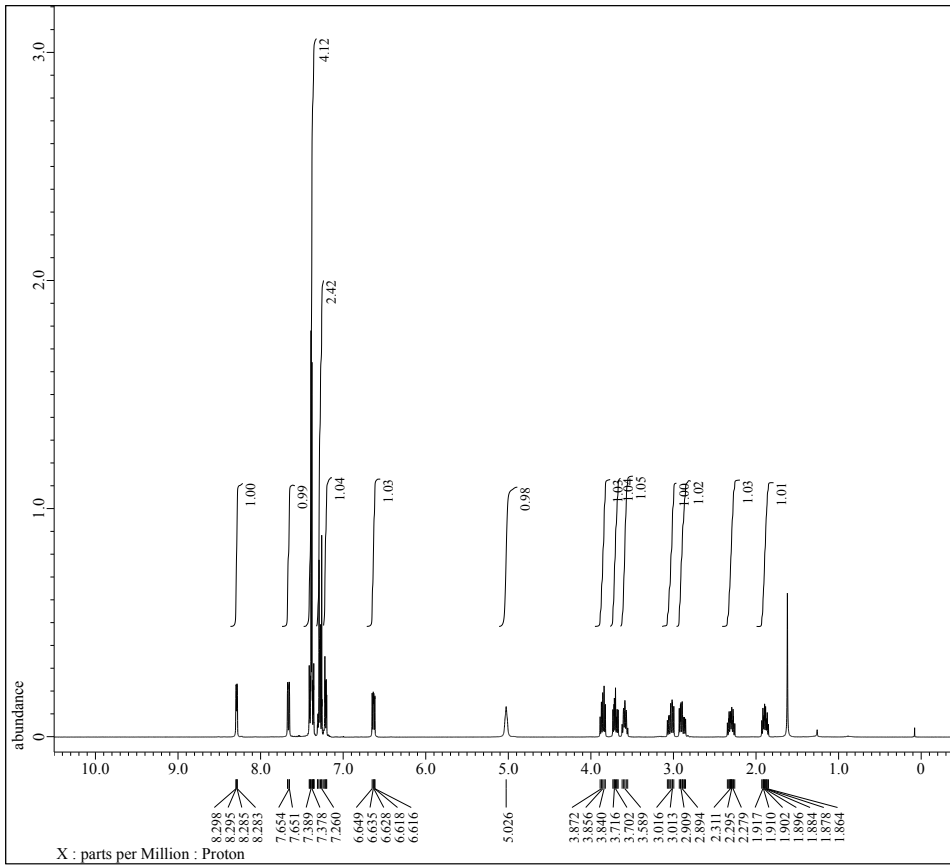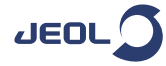

```

Filename      = 3ae proton-1.jdf
Author       = delta
Irr_Freq     = 399.78219838[MHz]
Experiment   = proton_jsp
Sample_Id    = tn30-30-2
Solvent      = CHLOROFORM-D

Comment      = single pulse
Data_Format  = 1D_COMPLEX
Dim_Size     = 13107
X_Domain     = Proto
Dim_Units    = [ppm]
Dimensions   = X
Spectrometer = JNM-ECZ400S/L1

Field_Strength = 9.389766[T] (400[MHz])
X_Acq_Duration = 2.18628096[s]
X_Domain       = 1H
X_Freq         = 399.78219838[MHz]
X_Offset       = 5[ppm]
X_Points       = 16384
X_Prescans     = 1
X_Resolution   = 0.45739775[Hz]
X_Sweep        = 7.4940048[kHz]
X_Sweep_Clippped = 5.99520384[kHz]
Irr_Domain     = Proton
Irr_Offset     = 5[ppm]
Tri_Domain     = Proton
Tri_Freq       = 399.78219838[MHz]
Tri_Offset     = 5[ppm]
Clipped        = FALSE
Scans          = 8
Total_Scans    = 8

Relaxation_Delay = 5[s]
Recvr_Gain       = 56
Temp_Get         = 21[dc]
X_90_Width       = 6.6[us]
X_Acq_Time       = 2.18628096[s]
X_Angle          = 45[deg]
X_Atn            = 0.9[db]
X_Pulse          = 3.3[us]
Irr_Mode         = Off
Tri_Mode         = Off
Dante_Preset     = FALSE
Initial_Wait     = 1[s]
Repetition_Time  = 7.18628096[s]
  
```

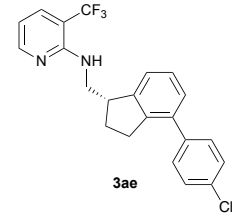

X : parts per Million : Proton

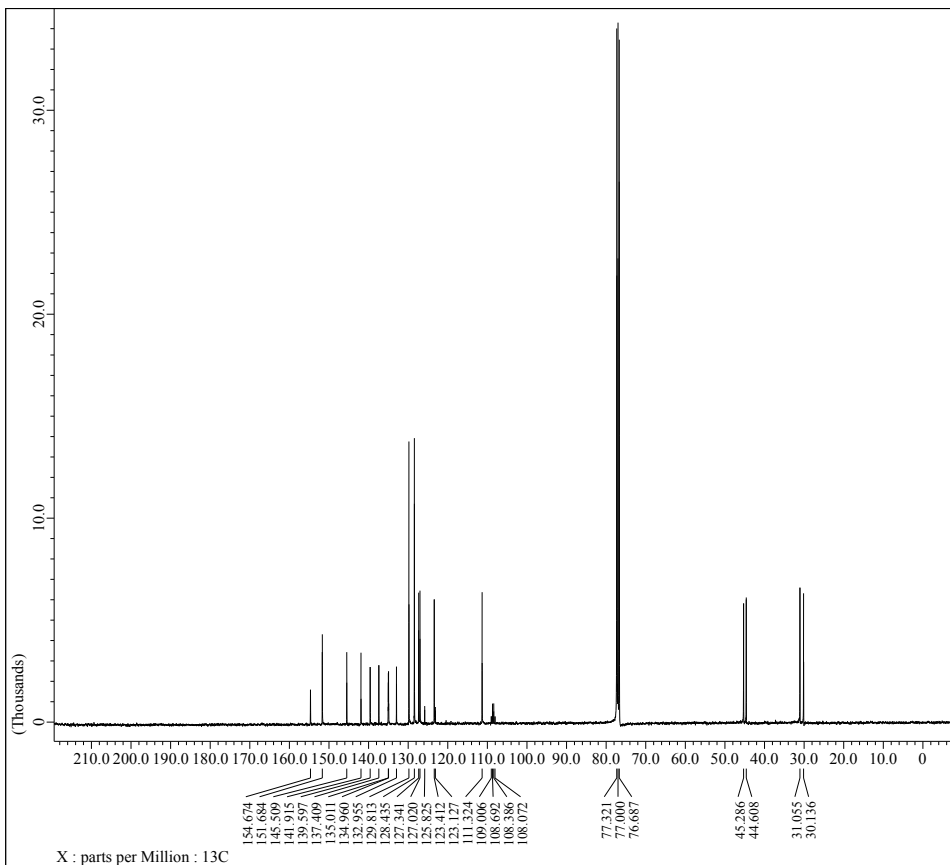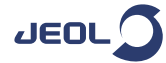

```

Filename      = 3ae carbon_10-2.jdf
Author       = FOC
Experiment   = zgpg30
Sample_Id    = Parameter file, TOPSPIN
Solvent      = CHLOROFORM-D

Comment      = Parameter file, TOPSPIN
Data_Format  = 1D_COMPLEX
Dim_Size     = 32768
X_Domain     = 13C
Dim_Units    = [ppm]
Dimensions   = X
Spectrometer = BRUKER_DMX_NMR

Field_Strength = 9.39793489[T] (400[MHz])
X_Domain       = 13C
X_Freq         = 100.61276853[MHz]
X_Offset       = 10.06080281[kHz]
X_Points       = 32768
X_Prescans     = 1
X_Sweep        = 24.03605805[kHz]
Scans          = 3000
Temp_Get       = 299.3348[K]
  
```

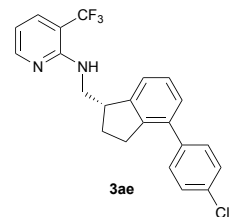

X : parts per Million : 13C

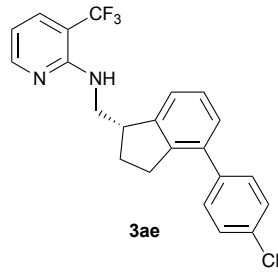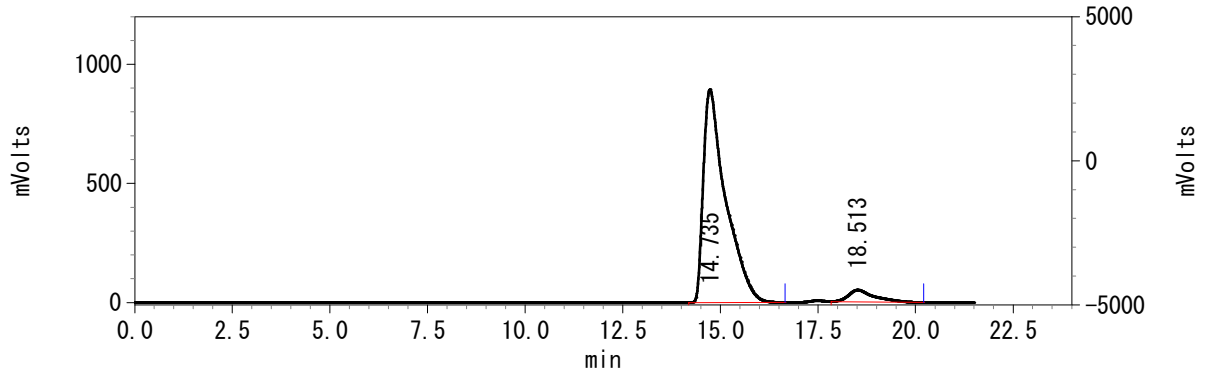

| Pk # | Retention Time | Area     | Area Percent |
|------|----------------|----------|--------------|
| 1    | 14.735         | 35611257 | 93.982       |
| 2    | 18.513         | 2280218  | 6.018        |

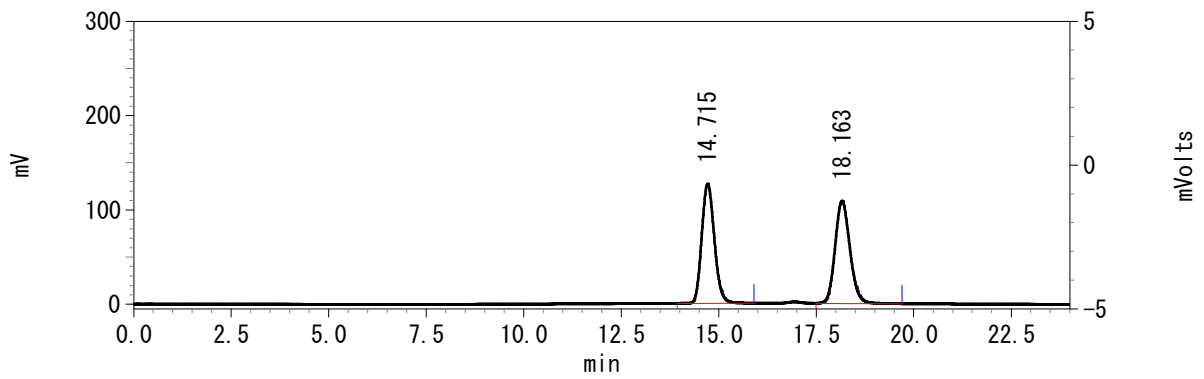

| Pk # | Retention Time | Area    | Area Percent |
|------|----------------|---------|--------------|
| 1    | 14.715         | 2847446 | 49.740       |
| 2    | 18.163         | 2877259 | 50.260       |

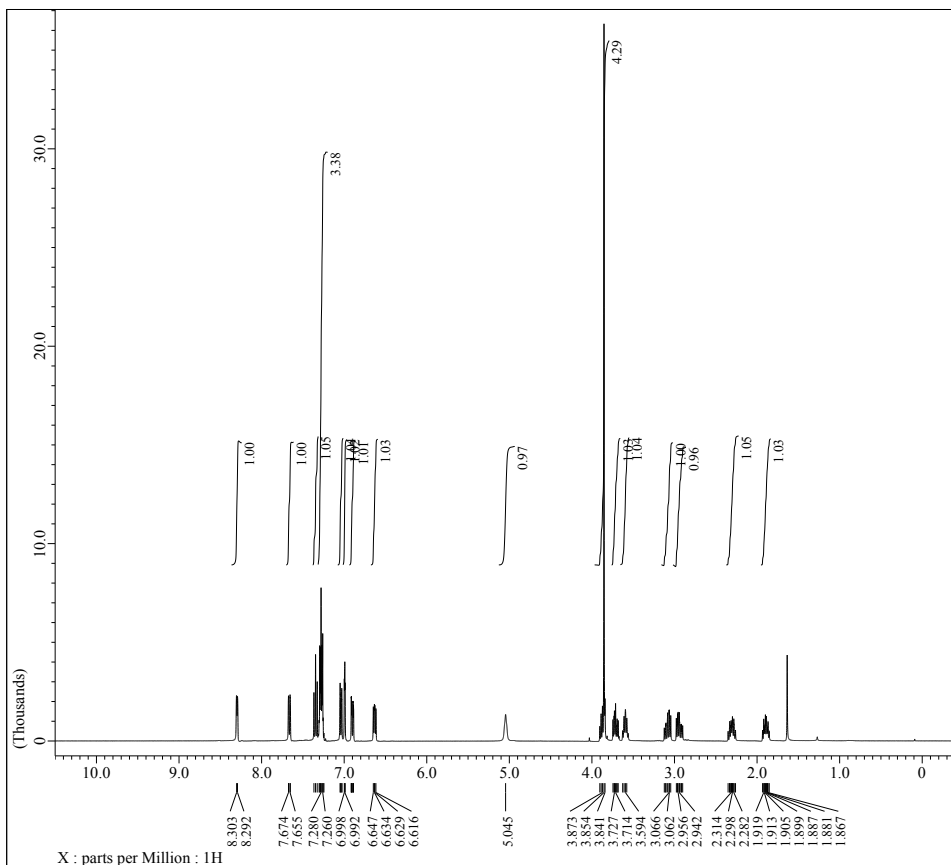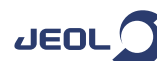

Filename = 3af H and C\_10-2.jdf  
 Author = FOC  
 Experiment = zg30  
 Sample Id = Parameter file, TOPSPIN  
 Solvent = CHLOROFORM-D  
 Comment = Parameter file, TOPSPIN  
 Data Format = 1D COMPLEX  
 Dim Size = 32768  
 X Domain = 1H  
 Dim Units = [ppm]  
 Dimensions = X  
 Spectrometer = BRUKER DMX NMR  
 Field Strength = 9.39793489[T] (400 [MHz])  
 X Domain = 1H  
 X Freq = 400.13 [MHz]  
 X Offset = 2.47096654 [kHz]  
 X Points = 32768  
 X Prescans = 1  
 X Sweep = 8.01277103 [kHz]  
 Scans = 8  
 Temp\_Get = 298.9966 [K]

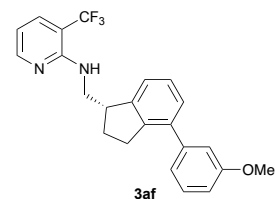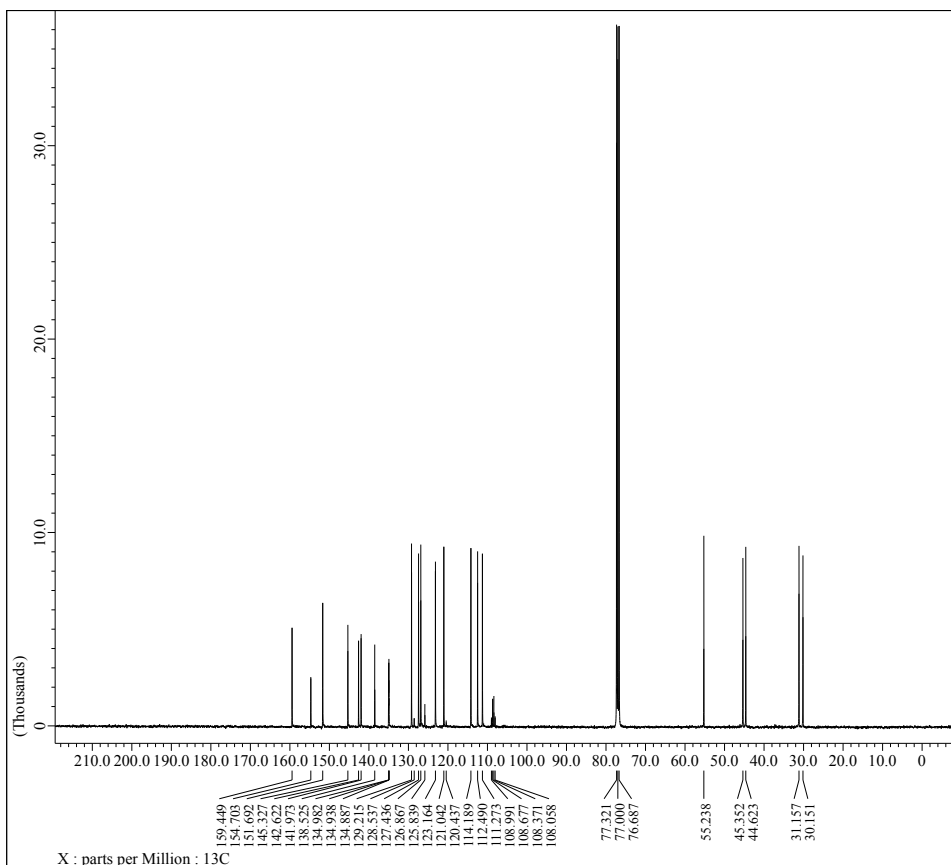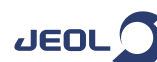

Filename = 3af H and C\_11-2.jdf  
 Author = zggg30  
 Experiment = zggg30  
 Sample Id = Parameter file, TOPSPIN  
 Solvent = CHLOROFORM-D  
 Comment = Parameter file, TOPSPIN  
 Data Format = 1D COMPLEX  
 Dim Size = 32768  
 X Domain = 13C  
 Dim Units = [ppm]  
 Dimensions = X  
 Spectrometer = BRUKER DMX NMR  
 Field Strength = 9.39793489[T] (400 [MHz])  
 X Domain = 13C  
 X Freq = 100.61276853 [MHz]  
 X Offset = 10.06080281 [kHz]  
 X Points = 32768  
 X Prescans = 1  
 X Sweep = 24.03605805 [kHz]  
 Scans = 3000  
 Temp\_Get = 299.477 [K]

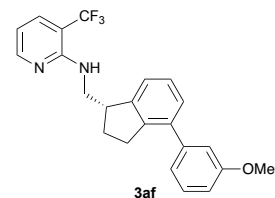

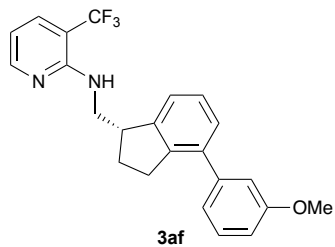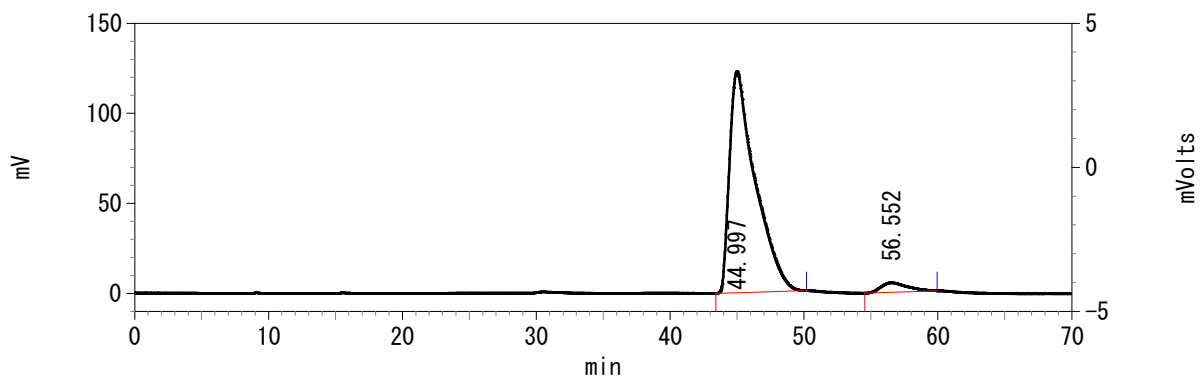

| Pk # | Retention Time | Area     | Area Percent |
|------|----------------|----------|--------------|
| 1    | 44.997         | 16334425 | 95.691       |
| 2    | 56.552         | 735559   | 4.309        |

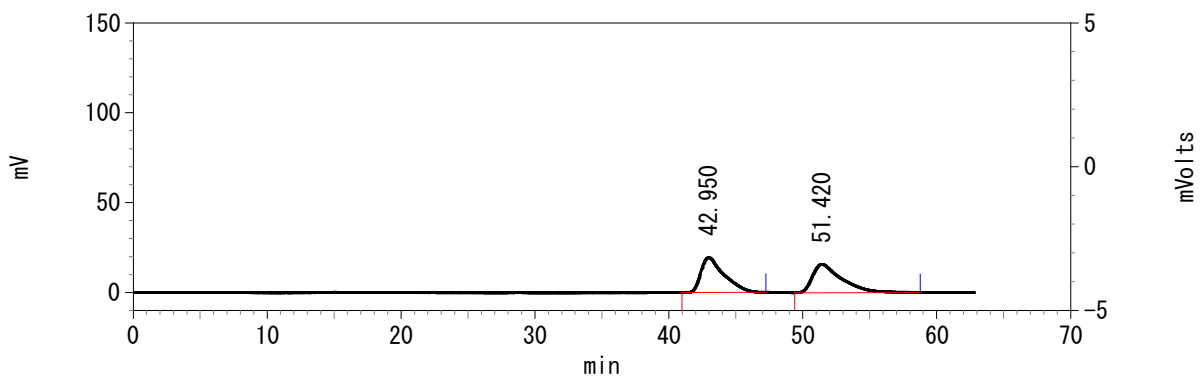

| Pk # | Retention Time | Area    | Area Percent |
|------|----------------|---------|--------------|
| 1    | 42.950         | 2338092 | 49.506       |
| 2    | 51.420         | 2384785 | 50.494       |

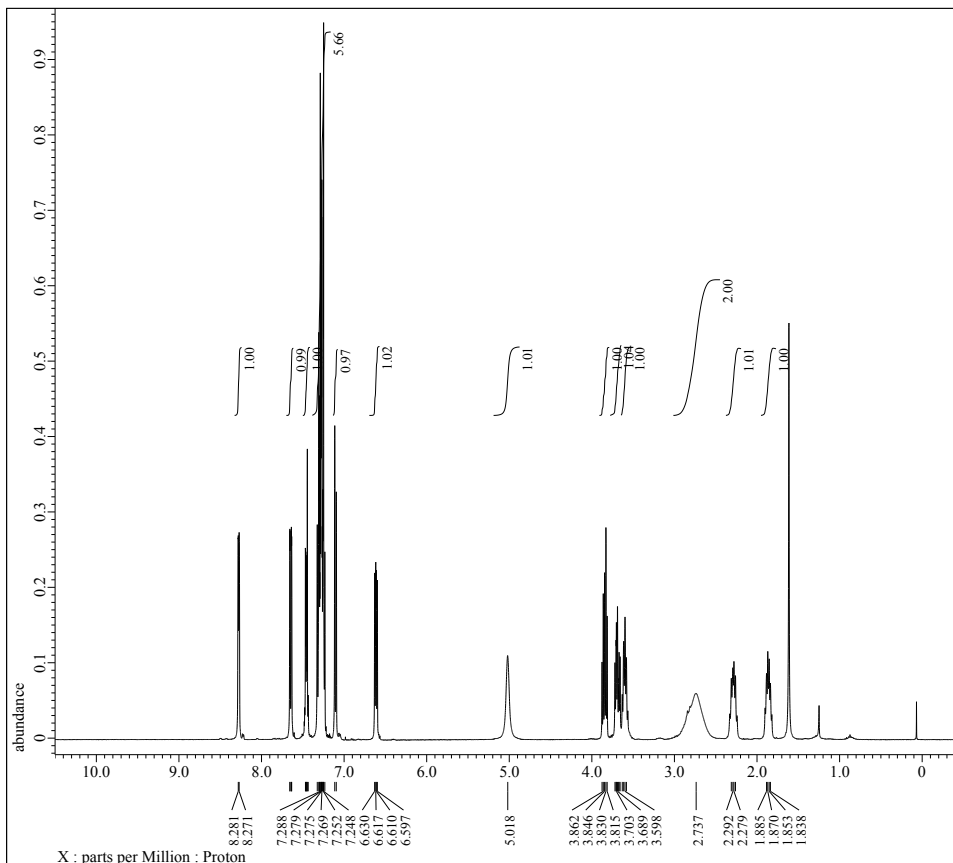

**JEOL**

```

Filename = tn30-32-1_Proton-1-9.jdf
Author = delta
Irr_Freq = 399.78219838[MHz]
Experiment = proton_jxp
Sample_Id = tn30-32-1
Solvent = CHLOROFORM-D
Comment = single_pulse
Data_Format = 1D_COMPLEX
Dim_Size = 13107
X_Domain = Proton
Dim_Units = [ppm]
Dimensions = X
Spectrometer = JNM-ECA400S/L1

Field_Strength = 9.389766[T] (400[MHz])
X_Acq_Duration = 2.18628096[s]
X_Domain = 1H
X_Freq = 399.78219838[MHz]
X_Offset = 5[ppm]
X Points = 16384
X_Prescans = 1
X_Resolution = 0.45739775[Hz]
X_Sweep = 7.4940048[kHz]
X_Sweep_Clipped = 5.99520384[kHz]
Irr_Domain = Proton
Irr_Offset = 5[ppm]
Tri_Domain = Proton
Tri_Freq = 399.78219838[MHz]
Tri_Offset = 5[ppm]
Clipped = FALSE
Scans = 8
Total_Scans = 8

Relaxation_Delay = 5[s]
Recvr_Gain = 56
Temp_Get = 20.9[dc]
X_90_Width = 6.6[us]
X_Acq_Time = 2.18628096[s]
X_Angle = 45[deg]
X_Atn = 0.9[db]
X_Pulse = 3.3[us]
Irr_Mode = Off
Tri_Mode = Off
Dante_Preset = FALSE
Initial_Wait = 1[s]
Repetition_Time = 7.18628096[s]

```

**3ag**

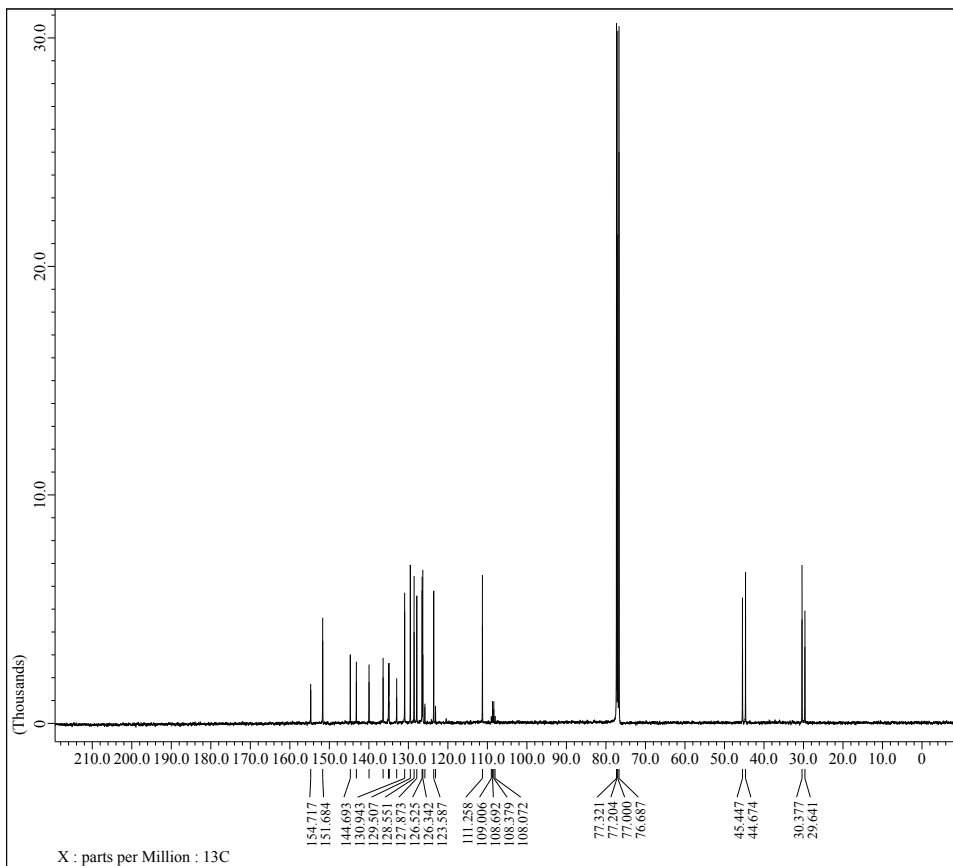

**JEOL**

```

Filename = 3ag_carbon_10-2.jdf
Author = zggq30
Experiment = zggq30
Sample_Id = Parameter file, TOPSPIN
Solvent = CHLOROFORM-D
Comment = Parameter file, TOPSPIN
Data_Format = 1D_COMPLEX
Dim_Size = 32768
X_Domain = 13C
Dim_Units = [ppm]
Dimensions = X
Spectrometer = BRUKER_DMX_NMR

Field_Strength = 9.39793489[T] (400[MHz])
X_Domain = 13C
X_Freq = 100.61276853[MHz]
X_Offset = 10.06080281[kHz]
X Points = 32768
X_Prescans = 1
X_Sweep = 24.03605805[kHz]
Scans = 3000
Temp_Get = 299.6772[K]

```

**3ag**

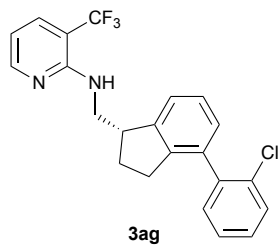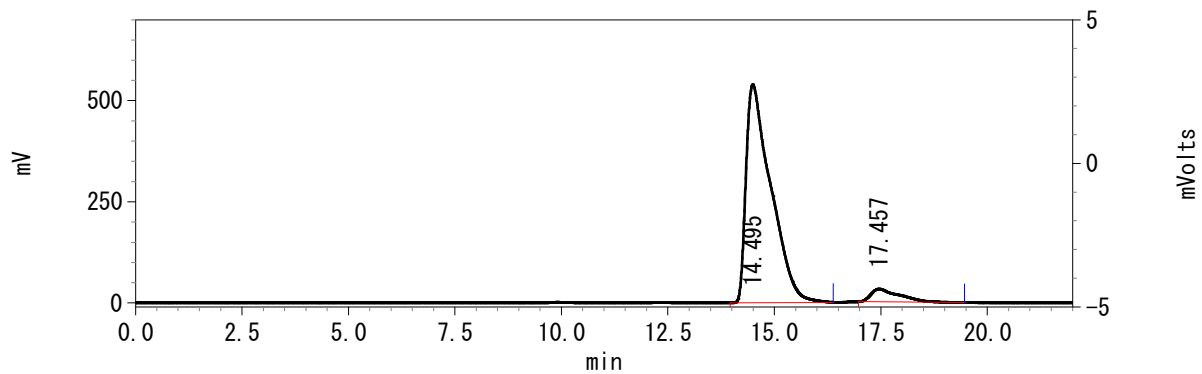

| Pk # | Retention Time | Area     | Area Percent |
|------|----------------|----------|--------------|
| 1    | 14.495         | 21878952 | 93.664       |
| 2    | 17.457         | 1479946  | 6.336        |

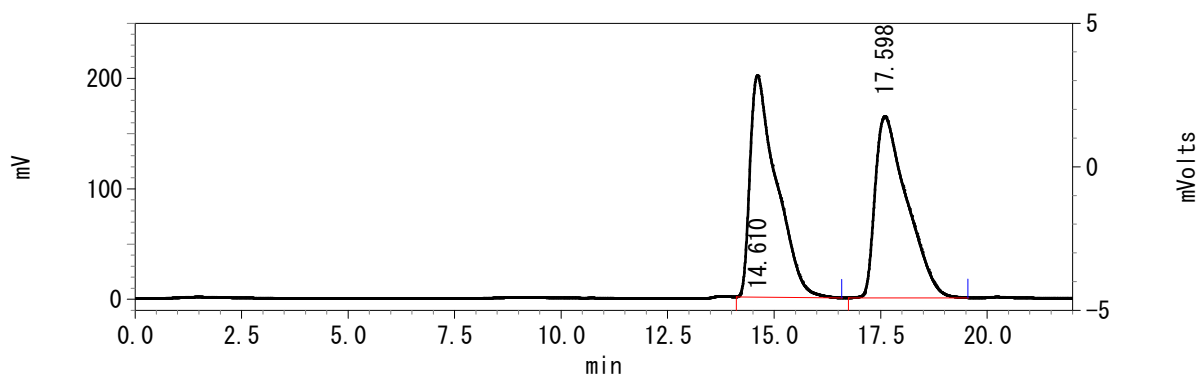

| Pk # | Retention Time | Area    | Area Percent |
|------|----------------|---------|--------------|
| 1    | 14.610         | 8688604 | 50.405       |
| 2    | 17.598         | 8548932 | 49.595       |

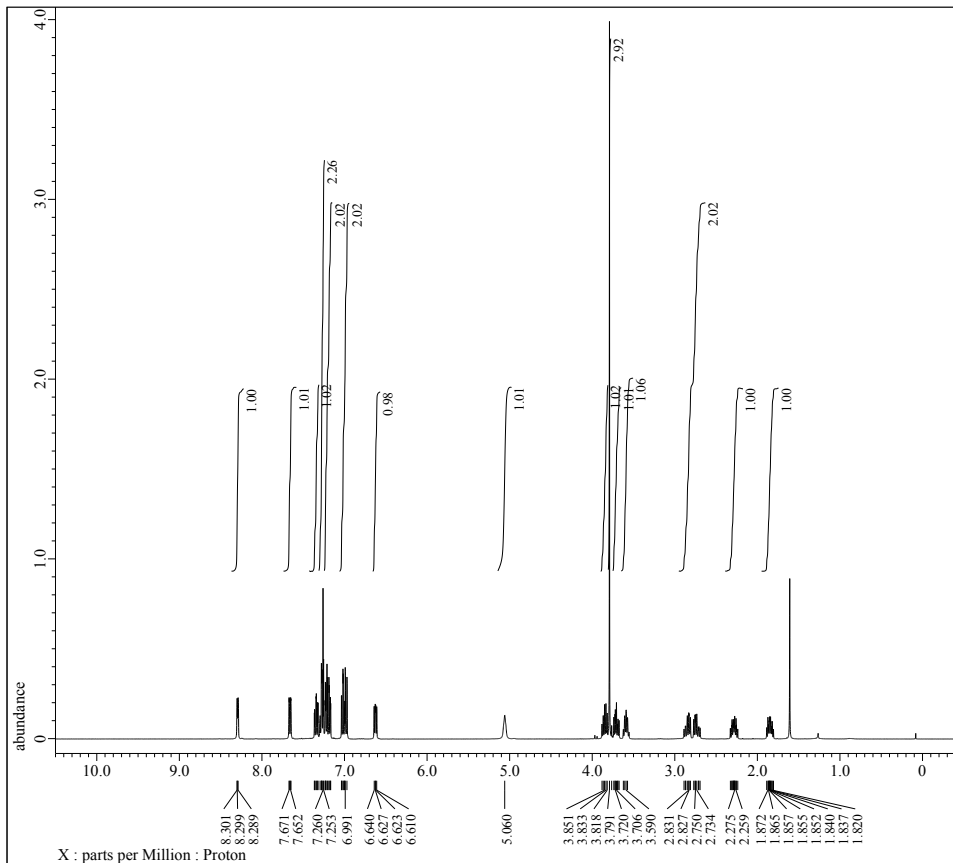

**JEOL**

```

Filename      = 3ah proton-1.jdf
Author       = delta
Irr_Freq     = 399.78219838 [MHz]
Experiment   = proton_jxp
Sample_Id    = tn30-27-2
Solvent      = CHLOROFORM-D
Comment      = single pulse
Data_Format  = 1D COMPLEX
Dim_Size     = 13107
X_Domain     = Proto
Dim_Units    = [ppm]
Dimensions   = X
Spectrometer = JNM-ECA400S/L1

Field_Strength = 9.389766 [T] (400 [MHz])
X_Acq_Duration = 2.18628096 [s]
X_Domain       = 1H
X_Freq         = 399.78219838 [MHz]
X_Offset       = 5 [ppm]
X_Points       = 16384
X_Prescans     = 1
X_Resolution   = 0.45739775 [Hz]
X_Sweep        = 7.4940048 [kHz]
X_Sweep_Clipped = 5.99520384 [kHz]
Irr_Domain     = Proton
Irr_Offset     = 5 [ppm]
Tri_Domain     = Proton
Tri_Freq       = 399.78219838 [MHz]
Tri_Offset     = 5 [ppm]
Clipped        = FALSE
Scans          = 8
Total_Scans    = 8

Relaxation_Delay = 5 [s]
Recvr_Gain       = 16
Temp_Get         = 20.6 [dC]
X_90_Width      = 6.6 [us]
X_Acq_Time      = 2.18628096 [s]
X_Angle         = 45 [deg]
X_Atn           = 0.9 [dB]
X_Pulse         = 3.3 [us]
Irr_Mode        = Off
Tri_Mode        = Off
Dante_Preset    = FALSE
Initial_Wait    = 1 [s]
Repetition_Time = 7.18628096 [s]
  
```

**3ah**

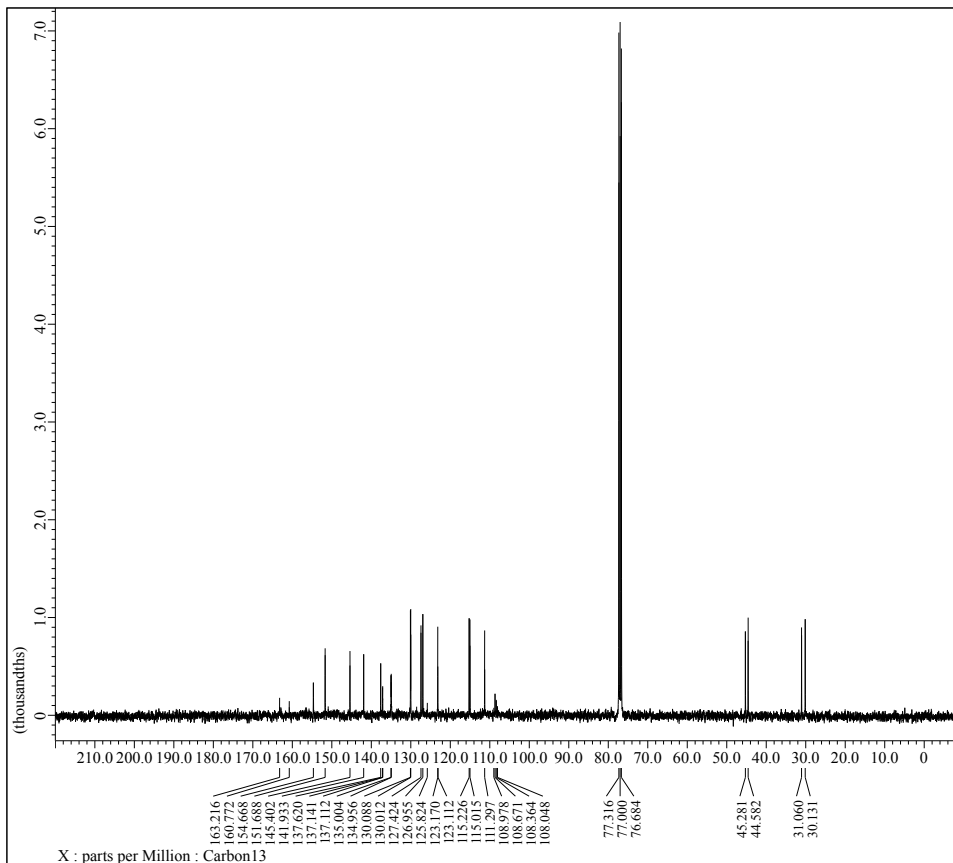

**JEOL**

```

Filename      = tn30-27-1_Carbon-1-4.jdf
Author       = delta
Irr_Freq     = 399.78219838 [MHz]
Experiment   = carbon_jxp
Sample_Id    = tn30-27-1
Solvent      = CHLOROFORM-D
Comment      = single pulse decoupled gat
Data_Format  = 1D COMPLEX
Dim_Size     = 26214
X_Domain     = Carbo
Dim_Units    = [ppm]
Dimensions   = X
Spectrometer = JNM-ECA400S/L1

Field_Strength = 9.389766 [T] (400 [MHz])
X_Acq_Duration = 1.03809024 [s]
X_Domain       = 13C
X_Freq         = 100.52530333 [MHz]
X_Offset       = 100 [ppm]
X_Points       = 32768
X_Prescans     = 4
X_Resolution   = 0.96330739 [Hz]
X_Sweep        = 31.56565657 [kHz]
X_Sweep_Clipped = 25.25252525 [kHz]
Irr_Domain     = Proton
Irr_Offset     = 5 [ppm]
Clipped        = FALSE
Scans          = 1024
Total_Scans    = 1024

Relaxation_Delay = 2 [s]
Recvr_Gain       = 50
Temp_Get         = 21 [dC]
X_90_Width      = 10.4 [us]
X_Acq_Time      = 1.03809024 [s]
X_Angle         = 30 [deg]
X_Atn           = 3.8 [dB]
X_Pulse         = 3.46666667 [us]
Initial_Wait    = 1 [s]
Repetition_Time = 3.03809024 [s]
  
```

**3ah**



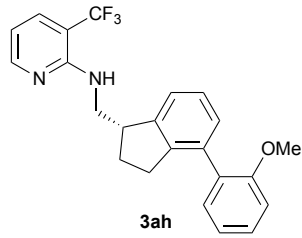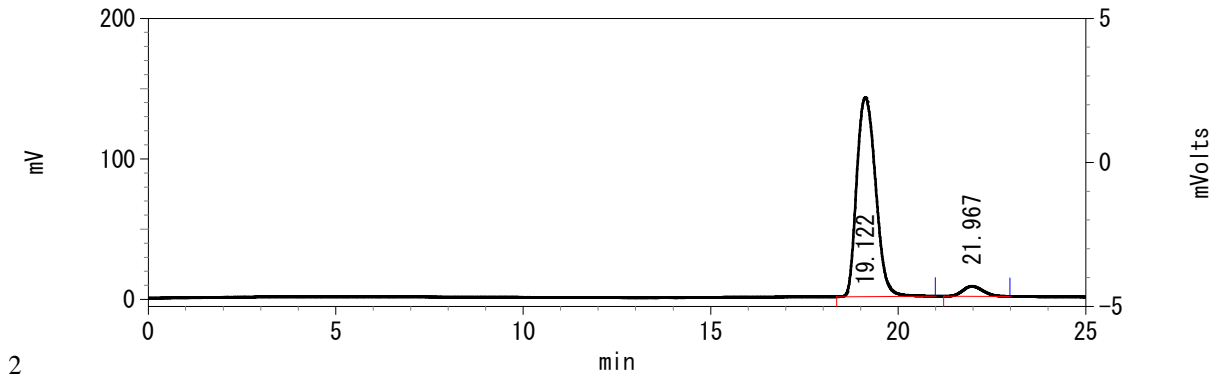

| Pk # | Retention Time | Area    | Area Percent |
|------|----------------|---------|--------------|
| 1    | 19.122         | 4972653 | 94.881       |
| 2    | 21.967         | 268258  | 5.119        |

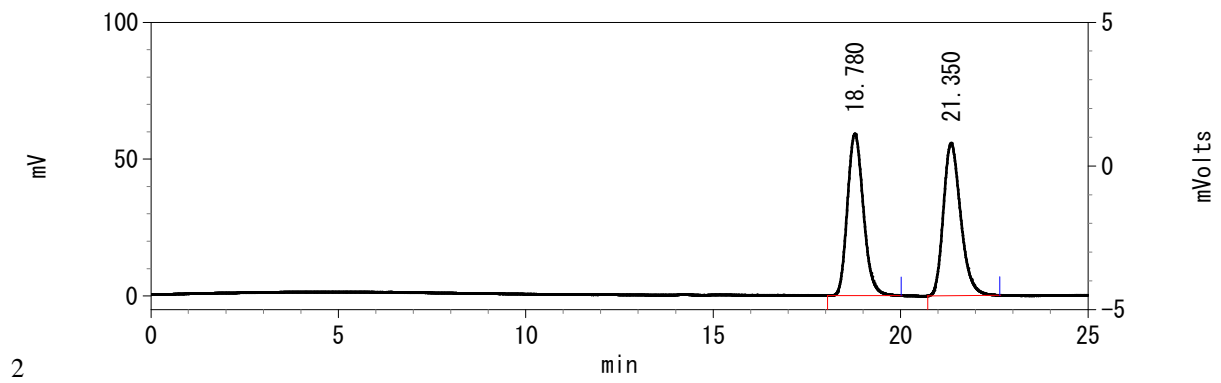

| Pk # | Retention Time | Area    | Area Percent |
|------|----------------|---------|--------------|
| 1    | 18.780         | 1756323 | 49.507       |
| 2    | 21.350         | 1791293 | 50.493       |

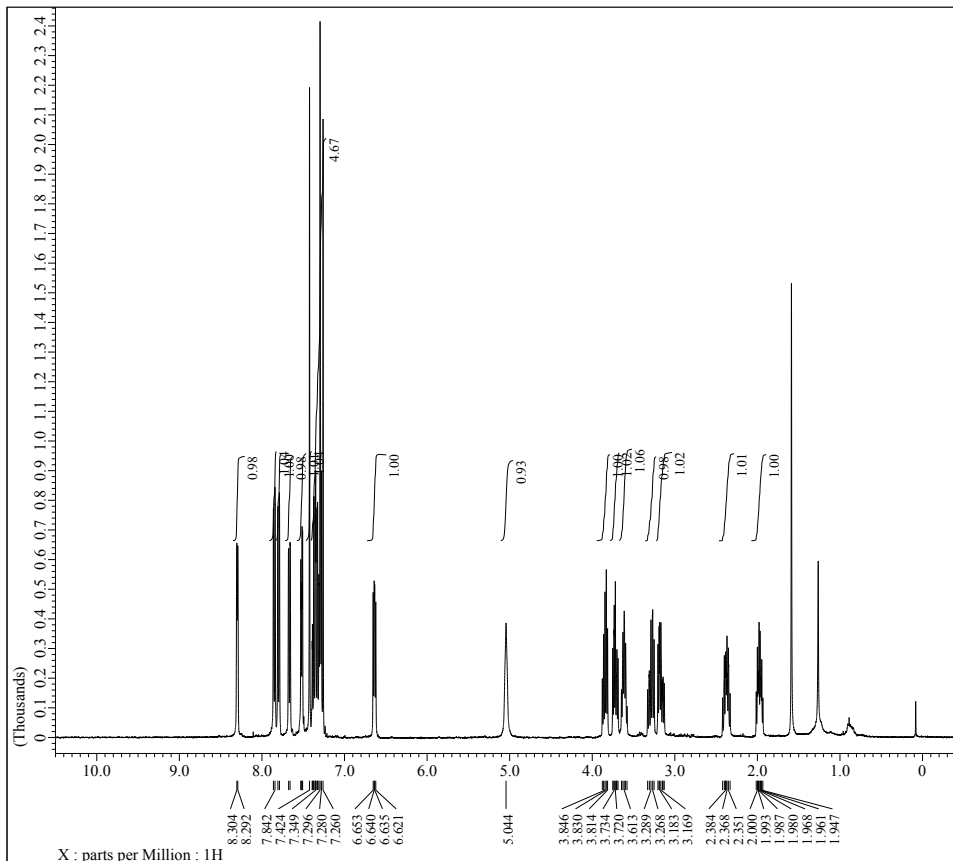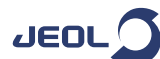

Filename = 3ai proton-1.jdf  
 Author = FOC  
 Experiment = zg30  
 Sample Id = Parameter file, TOPSPIN  
 Solvent = CHLOROFORM-D  
 Comment = Parameter file, TOPSPIN  
 Data Format = 1D COMPLEX  
 Dim Size = 32768  
 X Domain = 1H  
 Dim Units = [ppm]  
 Dimensions = X  
 Spectrometer = BRUKER\_DMX\_NMR  
 Field Strength = 9.39793489[T] (400[MHz])  
 X Domain = 1H  
 X Freq = 400.13[MHz]  
 X Offset = 2.47096654[kHz]  
 X Points = 32768  
 X Prescans = 1  
 X Sweep = 8.01277103[kHz]  
 Scans = 4  
 Temp\_Get = 297.0534[K]

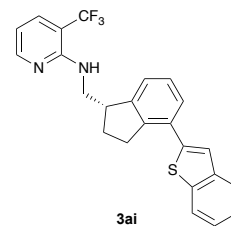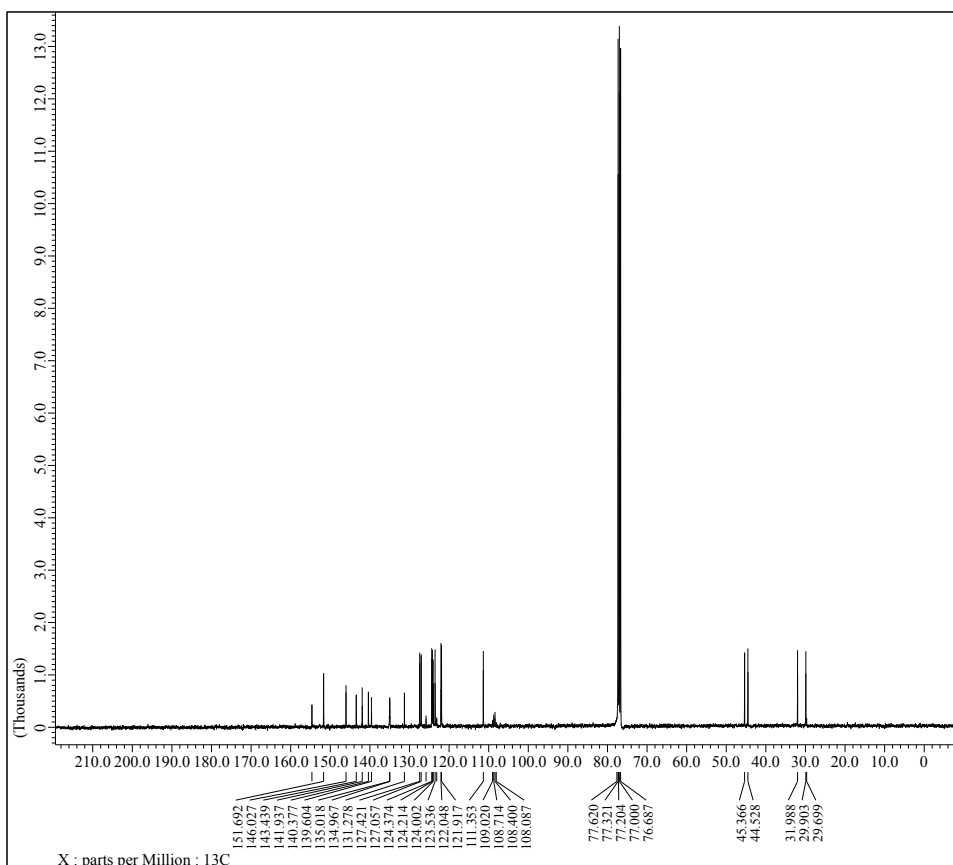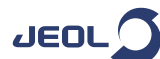

Filename = 3ai carbon\_10-2.jdf  
 Author = FOC  
 Experiment = zgpg30  
 Sample Id = Parameter file, TOPSPIN  
 Solvent = CHLOROFORM-D  
 Comment = Parameter file, TOPSPIN  
 Data Format = 1D COMPLEX  
 Dim Size = 32768  
 X Domain = 13C  
 Dim Units = [ppm]  
 Dimensions = X  
 Spectrometer = BRUKER\_DMX\_NMR  
 Field Strength = 9.39793489[T] (400[MHz])  
 X Domain = 13C  
 X Freq = 100.61276853[MHz]  
 X Offset = 10.06080281[kHz]  
 X Points = 32768  
 X Prescans = 1  
 X Sweep = 24.03605805[kHz]  
 Scans = 1024  
 Temp\_Get = 297.6853[K]

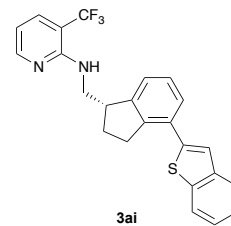

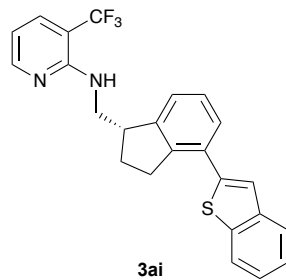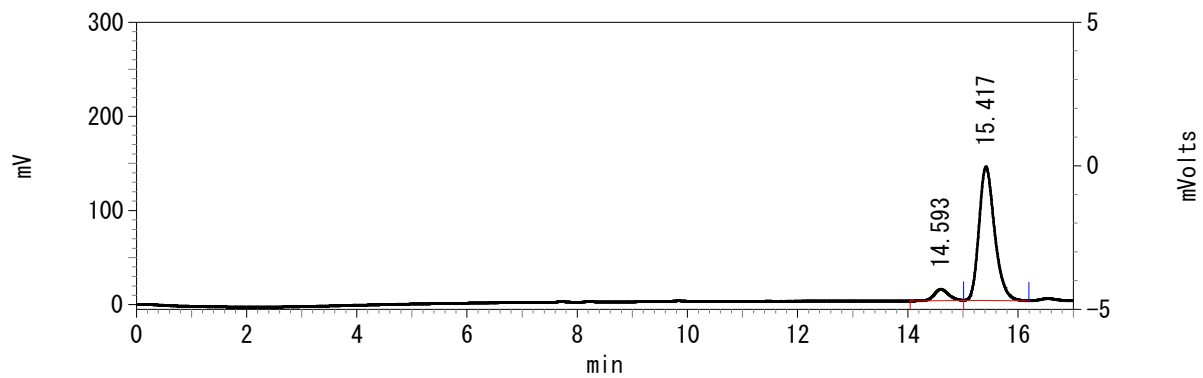

| Pk # | Retention Time | Area    | Area Percent |
|------|----------------|---------|--------------|
| 1    | 14.593         | 218379  | 7.244        |
| 2    | 15.417         | 2796317 | 92.756       |

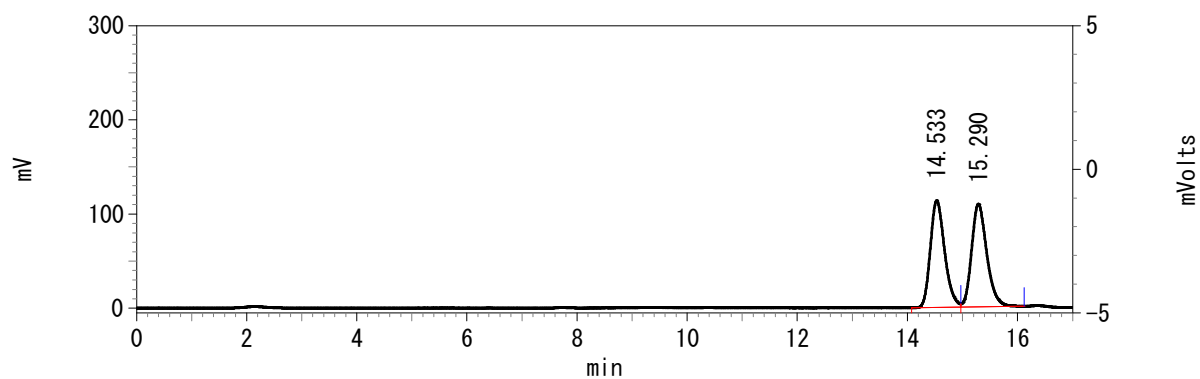

| Pk # | Retention Time | Area    | Area Percent |
|------|----------------|---------|--------------|
| 1    | 14.533         | 2044353 | 49.412       |
| 2    | 15.290         | 2093022 | 50.588       |

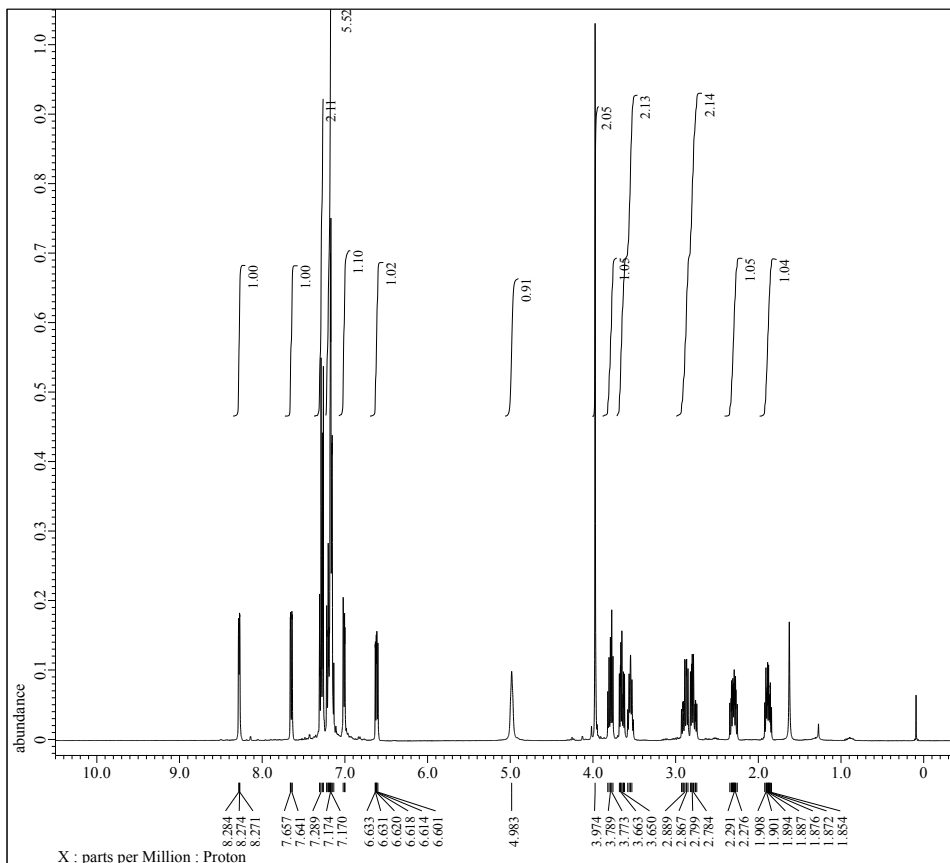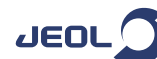

Filename = tn30-50\_Proton-1-5.jdf  
 Author = delta  
 Irr\_Freq = 399.78219838 [MHz]  
 Experiment = proton\_jxp  
 Sample\_Id = tn30-50  
 Solvent = CHLOROFORM-D  
 Comment = single pulse  
 Data\_Format = 1D\_COMPLEX  
 Dim\_Size = 13107  
 X\_Domain = Proto  
 Dim\_Units = [ppm]  
 Dimensions = X  
 Spectrometer = JNM-ECC400S/L1  
 Field\_Strength = 9.389766 [T] (400 [MHz])  
 X\_Acq\_Duration = 2.18628096 [s]  
 X\_Domain = 1H  
 X\_Freq = 399.78219838 [MHz]  
 X\_Offset = 5 [ppm]  
 X\_Points = 16384  
 X\_Prescans = 1  
 X\_Resolution = 0.45739775 [Hz]  
 X\_Sweep = 7.4940048 [kHz]  
 X\_Sweep\_Clipped = 5.99520384 [kHz]  
 Irr\_Domain = Proton  
 Irr\_Offset = 5 [ppm]  
 Tri\_Domain = Proton  
 Tri\_Freq = 399.78219838 [MHz]  
 Tri\_Offset = 5 [ppm]  
 Clipped = FALSE  
 Scans = 8  
 Total\_Scans = 8  
 Relaxation\_Delay = 5 [s]  
 Recvr\_Gain = 100  
 Temp\_Get = 20.8 [dC]  
 X\_90\_Width = 5.89 [us]  
 X\_Acq\_Time = 2.18628096 [s]  
 X\_Angle = 45 [deg]  
 X\_Atn = 0.9 [dB]  
 X\_Pulse = 2.945 [us]  
 Irr\_Mode = Off  
 Tri\_Mode = Off  
 Dante\_Preset = FALSE  
 Initial\_Wait = 1 [s]  
 Repetition\_Time = 7.18628096 [s]

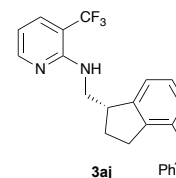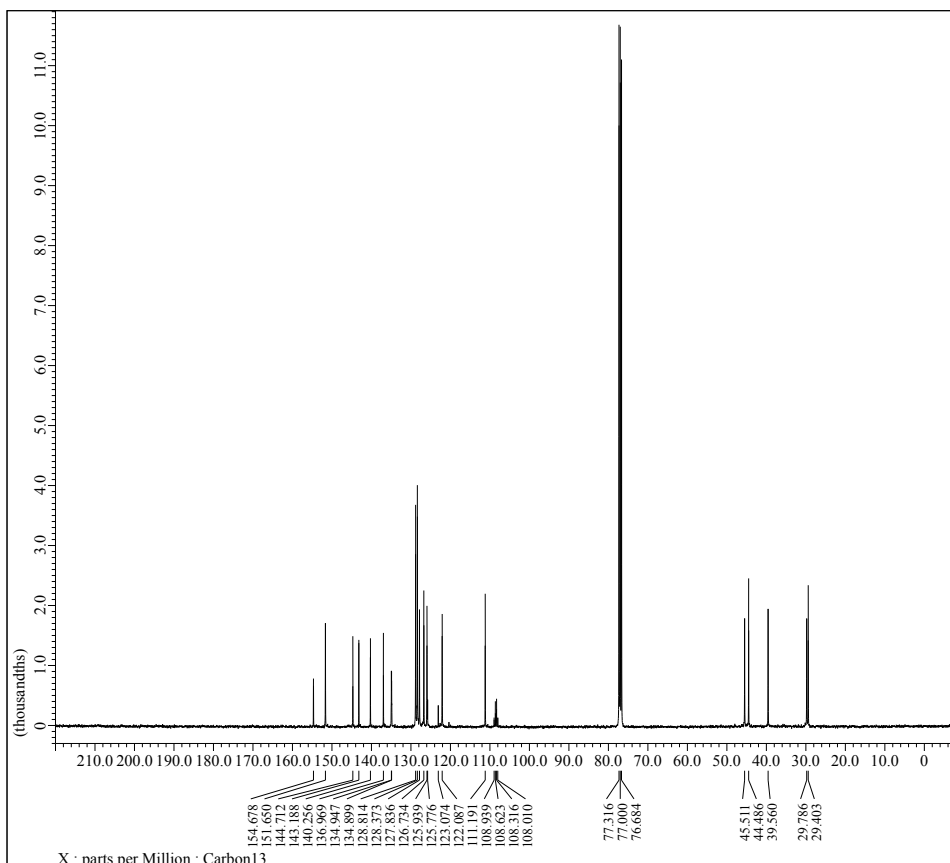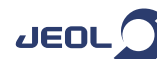

Filename = tn30-50\_Carbon-1-3.jdf  
 Author = delta  
 Irr\_Freq = 399.78219838 [MHz]  
 Experiment = carbon\_jxp  
 Sample\_Id = tn30-50  
 Solvent = CHLOROFORM-D  
 Comment = single pulse decoupled gat  
 Data\_Format = 1D\_COMPLEX  
 Dim\_Size = 26214  
 X\_Domain = Carbo  
 Dim\_Units = [ppm]  
 Dimensions = X  
 Spectrometer = JNM-ECC400S/L1  
 Field\_Strength = 9.389766 [T] (400 [MHz])  
 X\_Acq\_Duration = 1.03809024 [s]  
 X\_Domain = 13C  
 X\_Freq = 100.52530333 [MHz]  
 X\_Offset = 100 [ppm]  
 X\_Points = 32768  
 X\_Prescans = 4  
 X\_Resolution = 0.96330739 [Hz]  
 X\_Sweep = 31.56565657 [kHz]  
 X\_Sweep\_Clipped = 25.25252525 [kHz]  
 Irr\_Domain = Proton  
 Irr\_Offset = 5 [ppm]  
 Clipped = TRUE  
 Scans = 7000  
 Total\_Scans = 7000  
 Relaxation\_Delay = 2 [s]  
 Recvr\_Gain = 50  
 Temp\_Get = 21.8 [dC]  
 X\_90\_Width = 10.55 [us]  
 X\_Acq\_Time = 1.03809024 [s]  
 X\_Angle = 30 [deg]  
 X\_Atn = 3.8 [dB]  
 X\_Pulse = 3.51666667 [us]  
 Initial\_Wait = 1 [s]  
 Repetition\_Time = 3.03809024 [s]

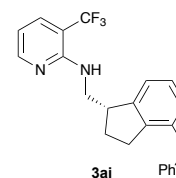

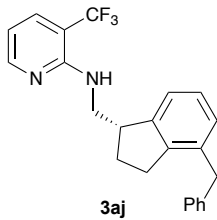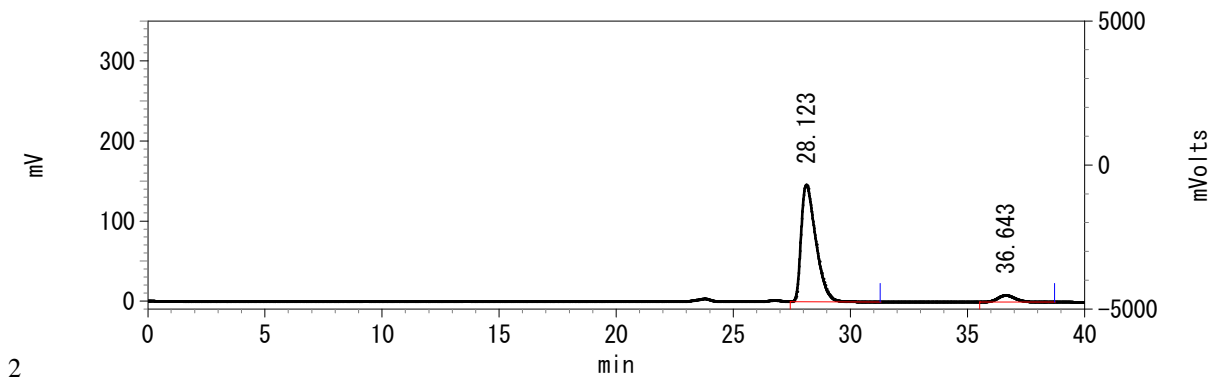

| Pk # | Retention Time | Area    | Area Percent |
|------|----------------|---------|--------------|
| 1    | 28.123         | 6370610 | 93.541       |
| 2    | 36.643         | 439901  | 6.459        |

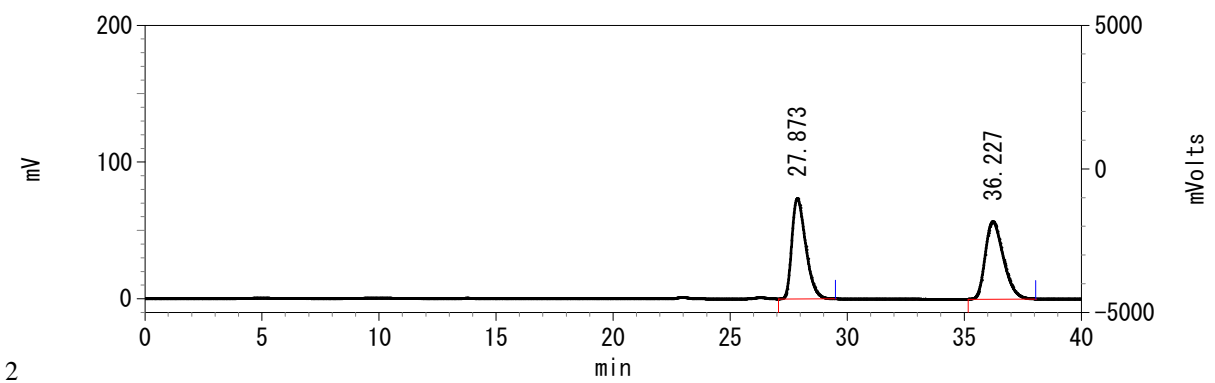

| Pk # | Retention Time | Area    | Area Percent |
|------|----------------|---------|--------------|
| 1    | 27.873         | 3032972 | 49.835       |
| 2    | 36.227         | 3053022 | 50.165       |

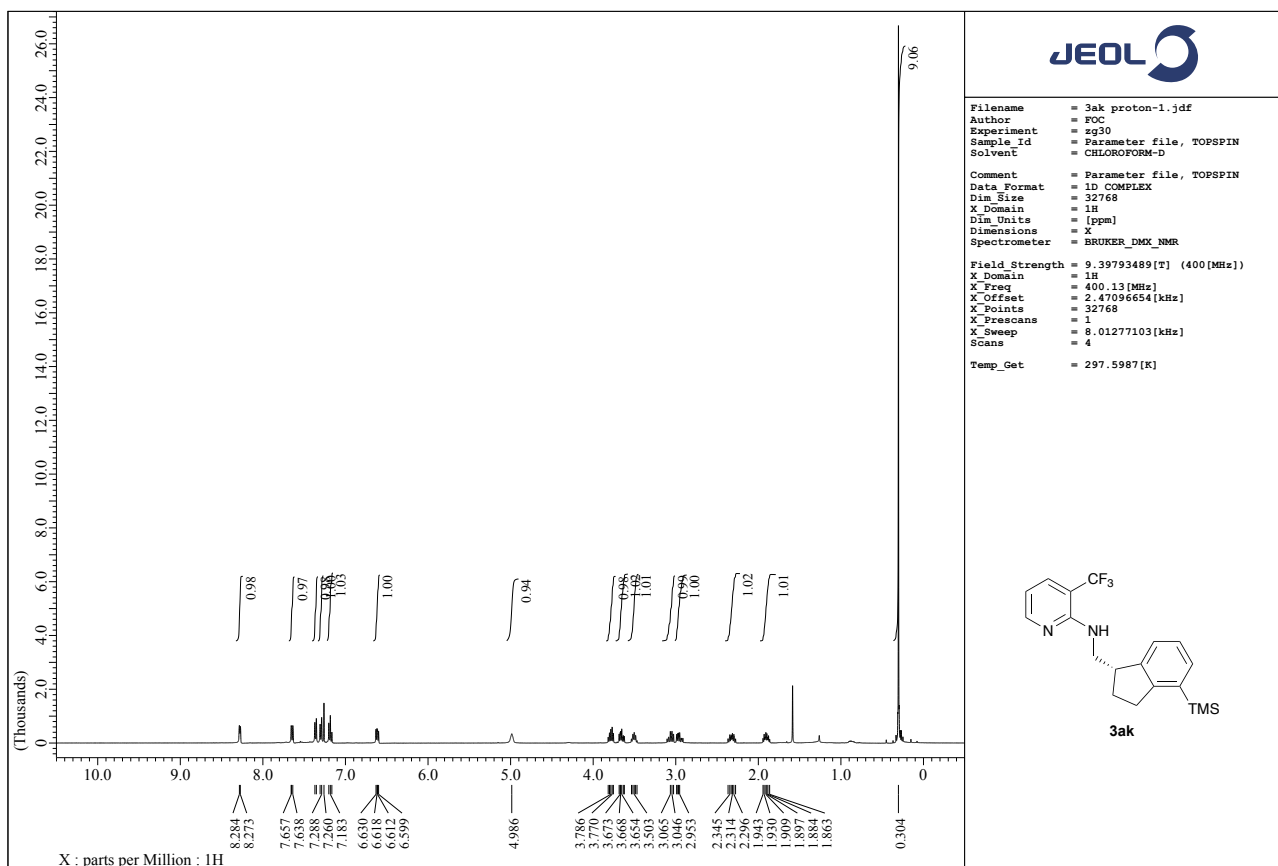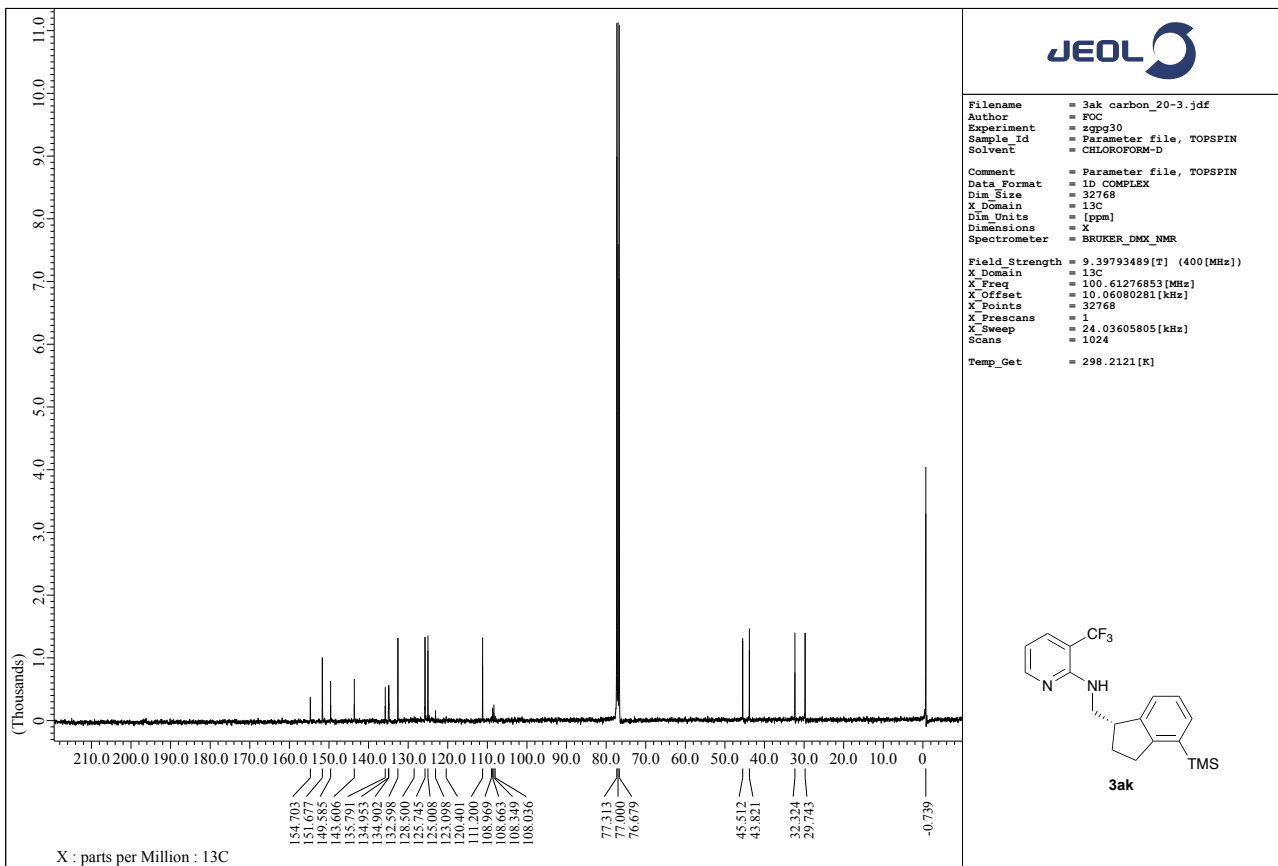

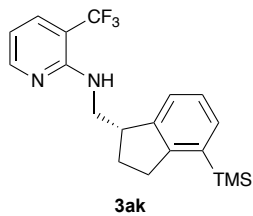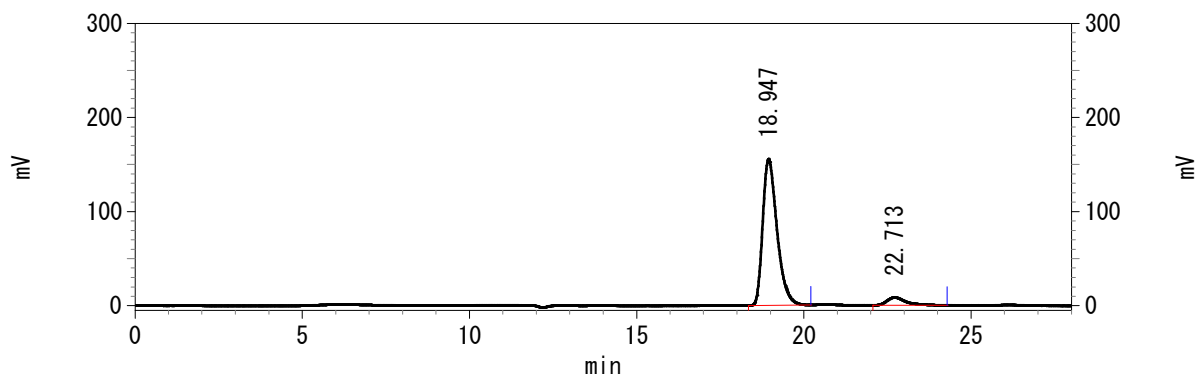

| Pk # | Retention Time | Area    | Area Percent |
|------|----------------|---------|--------------|
| 1    | 18.947         | 4615164 | 93.153       |
| 2    | 22.713         | 339212  | 6.847        |

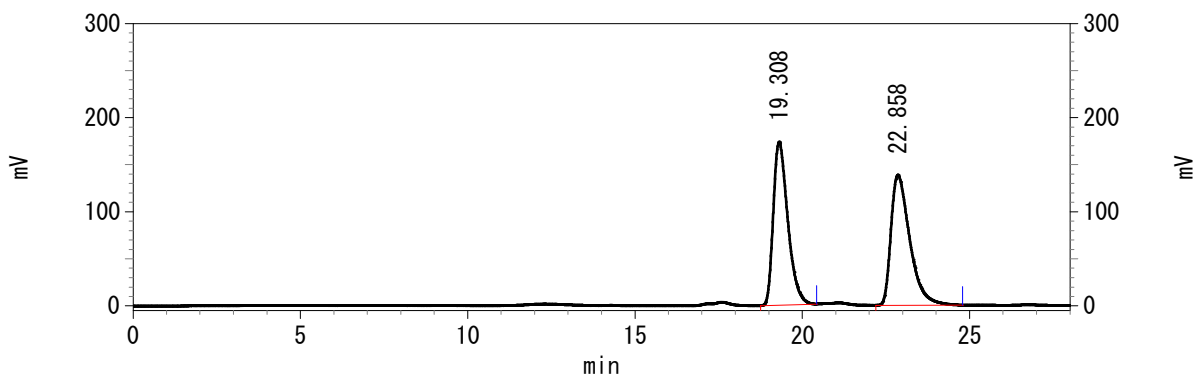

| Pk # | Retention Time | Area    | Area Percent |
|------|----------------|---------|--------------|
| 1    | 19.308         | 5215635 | 49.147       |
| 2    | 22.858         | 5396636 | 50.853       |

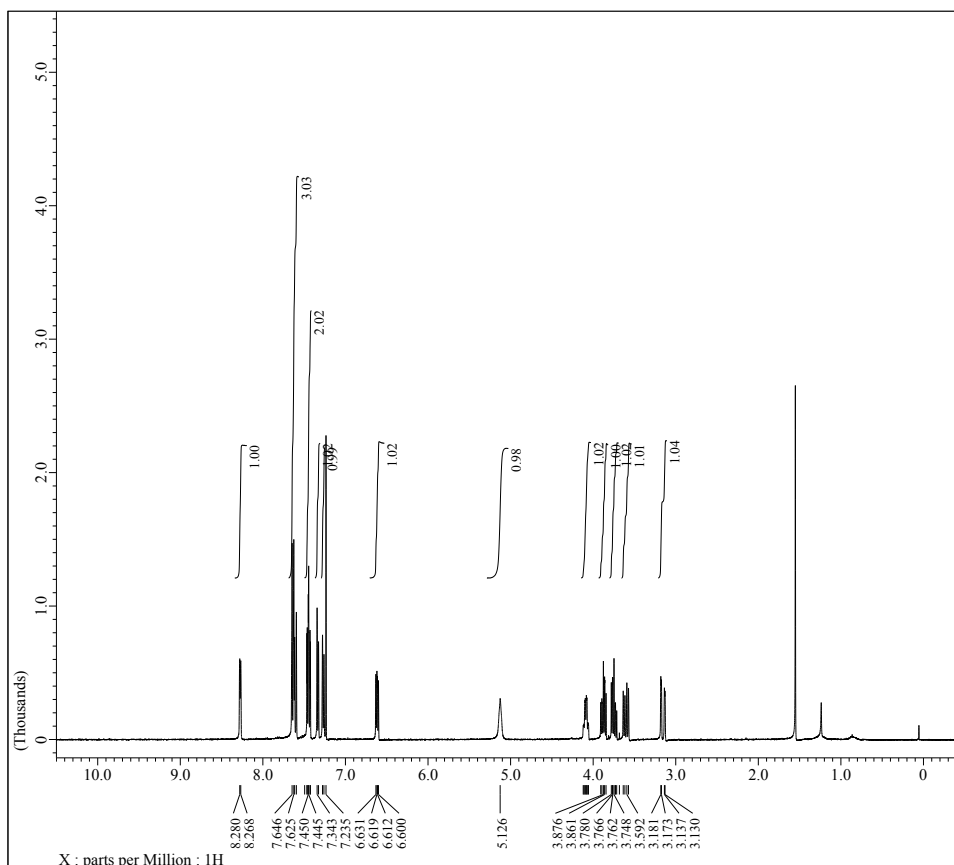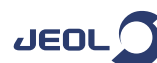

Filename = 3a1 proton-1.jdf  
 Author = FOC  
 Experiment = sq30  
 Sample\_id = Parameter file, TOPSPIN  
 Solvent = CHLOROFORM-D  
 Comment = Parameter file, TOPSPIN  
 Data\_Format = 1D\_COMPLEX  
 Dim\_Size = 32768  
 X\_Domain = 1H  
 Dim\_Units = [ppm]  
 Dimensions = X  
 Spectrometer = BRUKER DMX NMR  
 Field Strength = 9.39793489[T] (400[MHz])  
 X\_Domain = 1H  
 X\_Freq = 400.13[MHz]  
 X\_Offset = 2.47096654[kHz]  
 X\_Points = 32768  
 X\_Prescans = 1  
 X\_Sweep = 6.01277103[kHz]  
 Scans = 4  
 Temp\_Get = 298.1123[K]

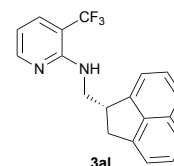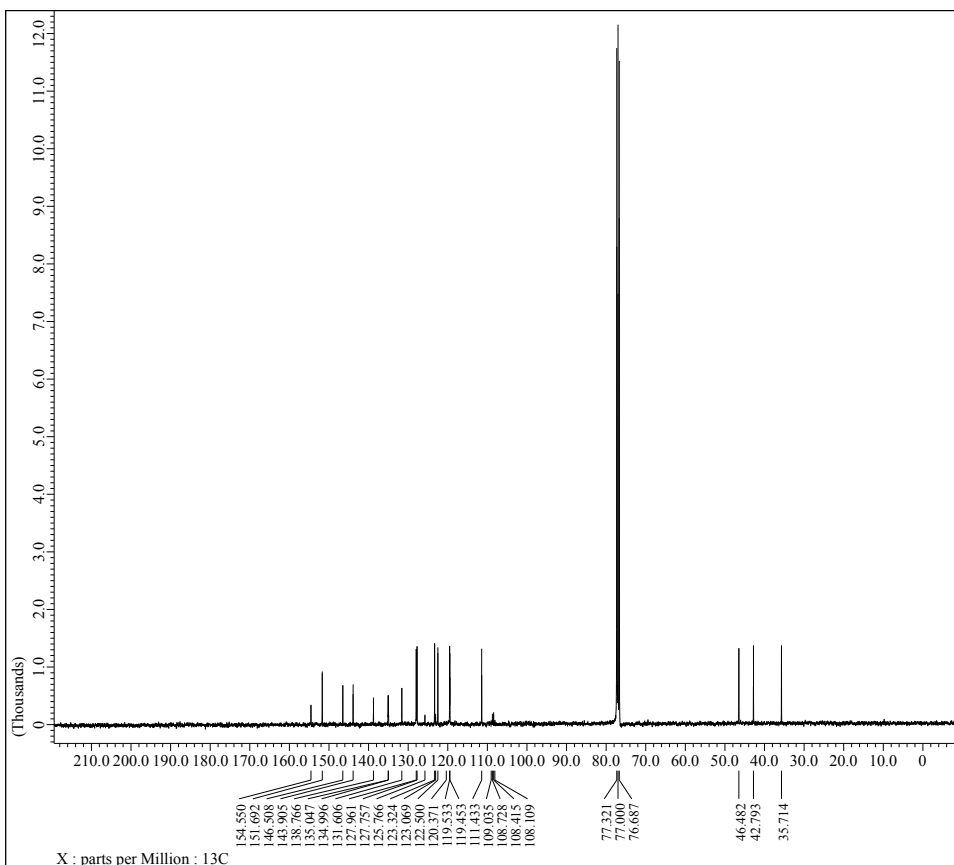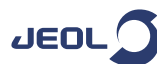

Filename = 3a1 carbon-1.jdf  
 Author = FOC  
 Experiment = sqg30  
 Sample\_id = Parameter file, TOPSPIN  
 Solvent = CHLOROFORM-D  
 Comment = Parameter file, TOPSPIN  
 Data\_Format = 1D\_COMPLEX  
 Dim\_Size = 32768  
 X\_Domain = 13C  
 Dim\_Units = [ppm]  
 Dimensions = X  
 Spectrometer = BRUKER DMX NMR  
 Field Strength = 9.39793489[T] (400[MHz])  
 X\_Domain = 13C  
 X\_Freq = 100.61276853[MHz]  
 X\_Offset = 10.06080281[kHz]  
 X\_Points = 32768  
 X\_Prescans = 1  
 X\_Sweep = 24.03605805[kHz]  
 Scans = 1024  
 Temp\_Get = 298.6896[K]

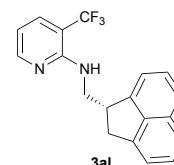



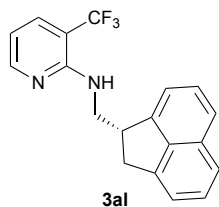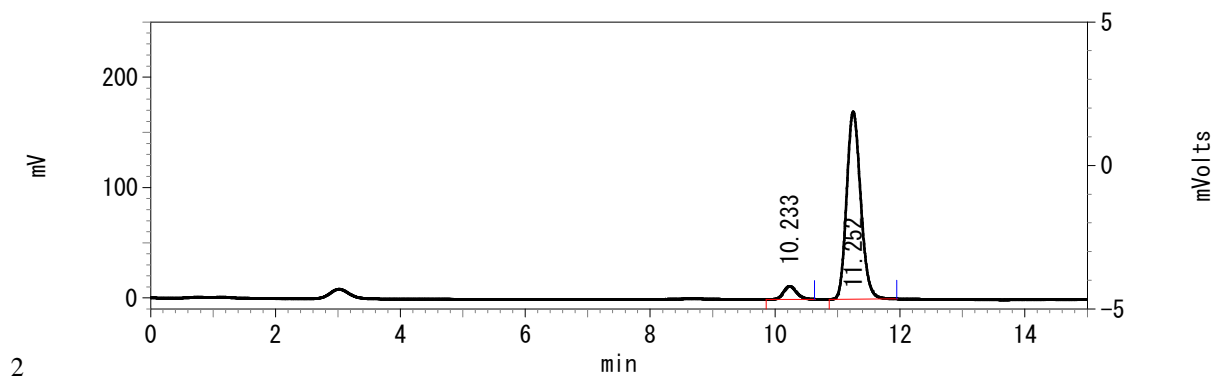

| Pk # | Retention Time | Area    | Area Percent |
|------|----------------|---------|--------------|
| 1    | 10.233         | 169518  | 5.999        |
| 2    | 11.252         | 2656101 | 94.001       |

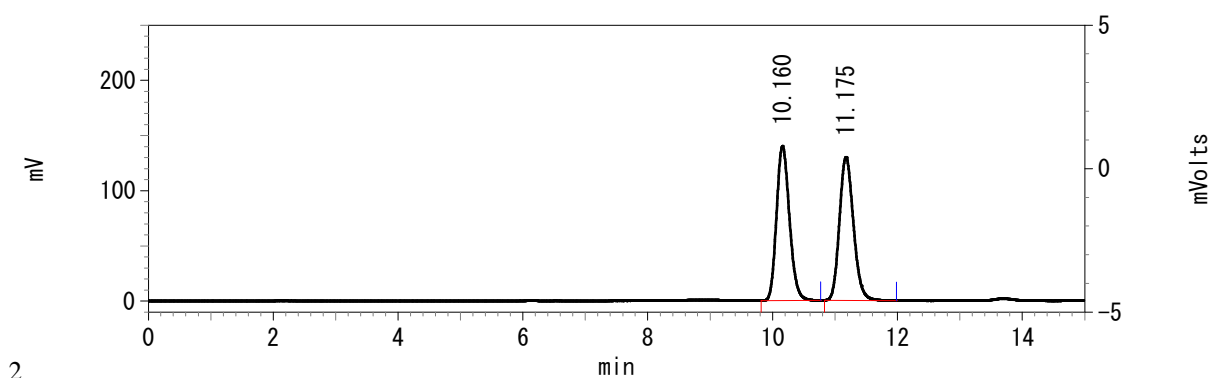

| Pk # | Retention Time | Area    | Area Percent |
|------|----------------|---------|--------------|
| 1    | 10.160         | 2016923 | 49.848       |
| 2    | 11.175         | 2029219 | 50.152       |

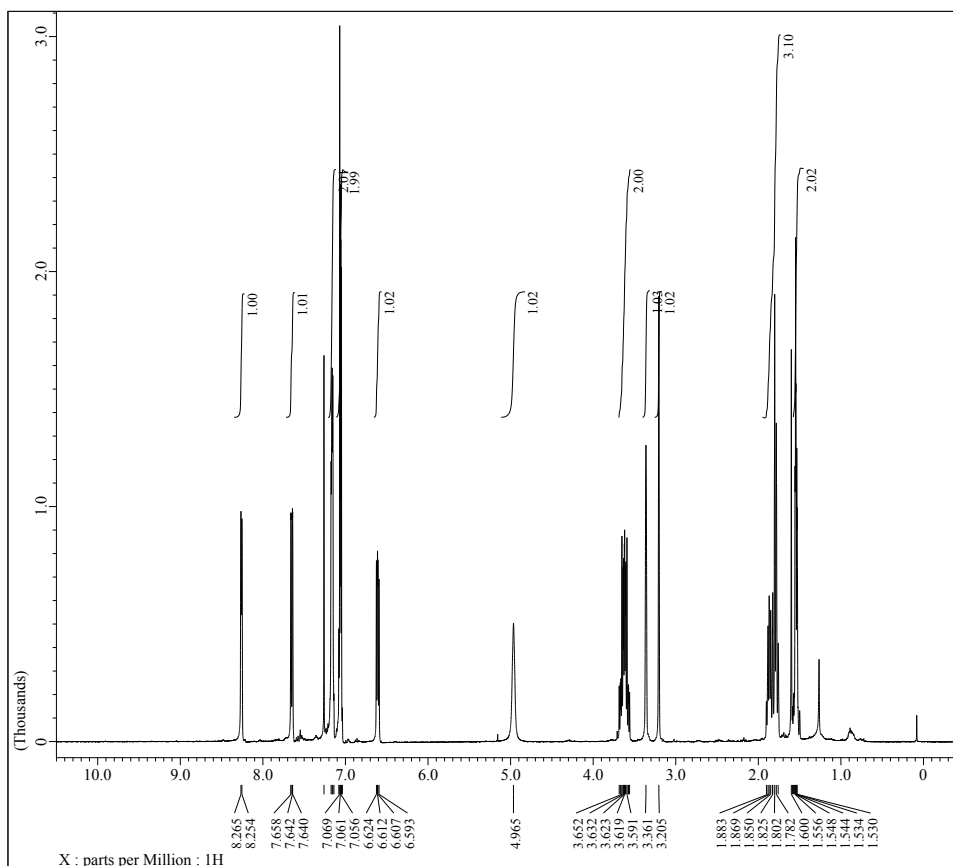

JEOL

```

Filename = 3am proton-1.jdf
Author = FOC
Experiment = zq30
Sample Id = Parameter file, TOPSPIN
Solvent = CHLOROFORM-D

Comment = Parameter file, TOPSPIN
Data Format = 1D COMPLEX
Dim Size = 32768
X Domain = 1H
X Freq = 400.13[MHz]
X Offset = 2.47096654[kHz]
X Points = 32768
Dim Units = [ppm]
Dimensions = X
Spectrometer = BRUKER DMX NMR

Field Strength = 9.39793489[T] (400[MHz])
X Domain = 1H
X Freq = 400.13[MHz]
X Offset = 2.47096654[kHz]
X Points = 32768
X Prescans = 1
X Sweep = 8.01277103[kHz]
Scans = 4

Temp_Get = 297.9462[K]

```

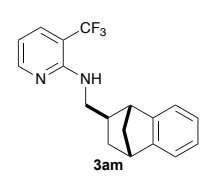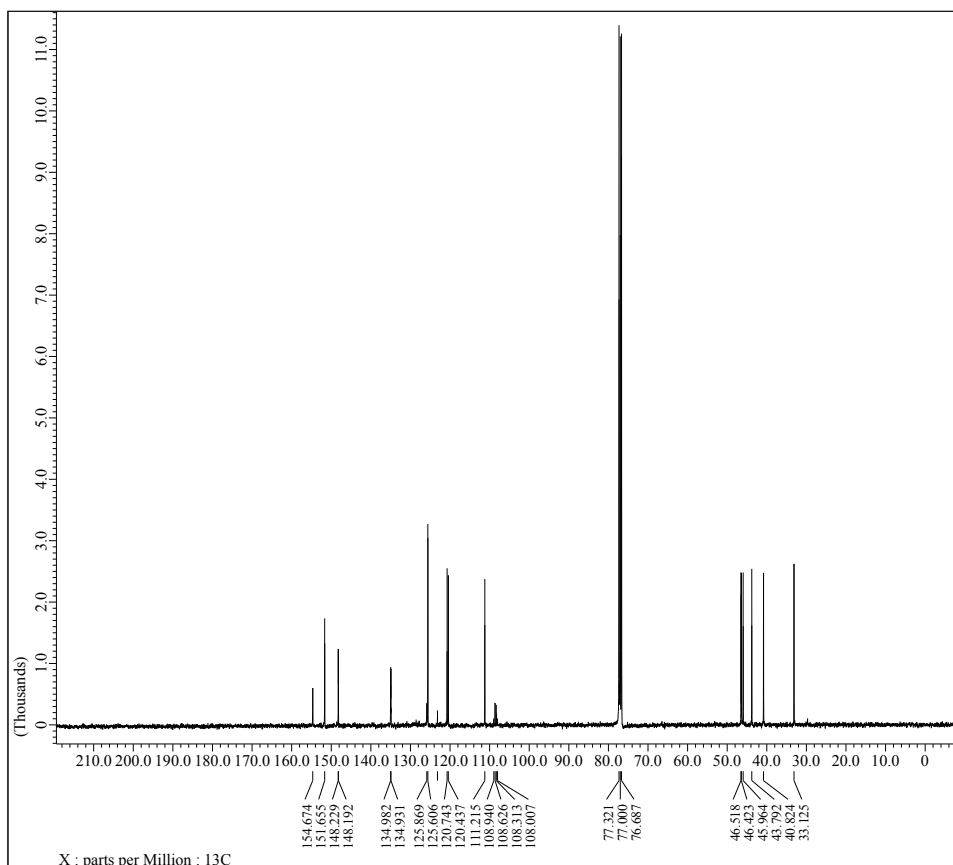

JEOL

```

Filename = 3am carbon-1.jdf
Author = FOC
Experiment = zqpg30
Sample Id = Parameter file, TOPSPIN
Solvent = CHLOROFORM-D

Comment = Parameter file, TOPSPIN
Data Format = 1D COMPLEX
Dim Size = 32768
X Domain = 13C
X Freq = 100.61276653[MHz]
X Offset = 10.06080281[kHz]
X Points = 32768
X Prescans = 1
X Sweep = 24.03605805[kHz]
Scans = 1024

Temp_Get = 298.5052[K]

```

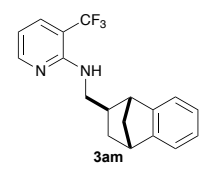

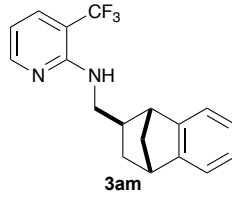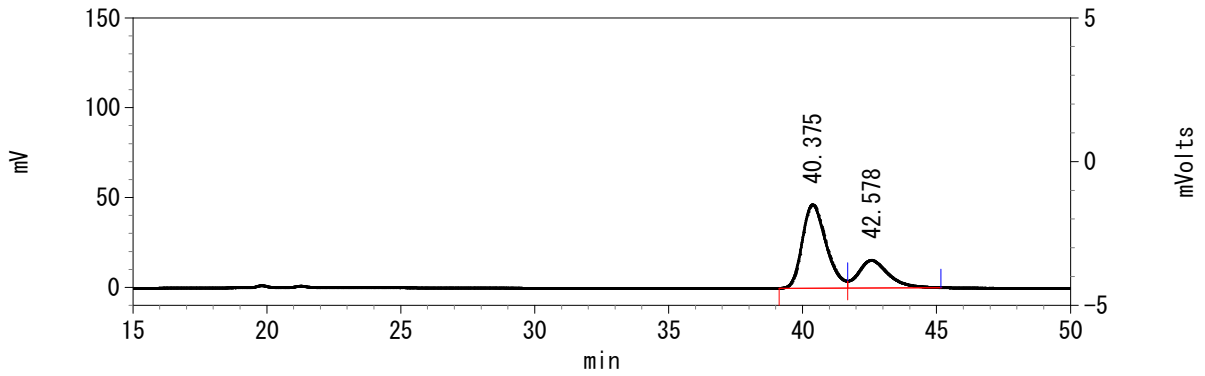

| Pk # | Retention Time | Area    | Area Percent |
|------|----------------|---------|--------------|
| 1    | 40.375         | 2883637 | 70.889       |
| 2    | 42.578         | 1184176 | 29.111       |

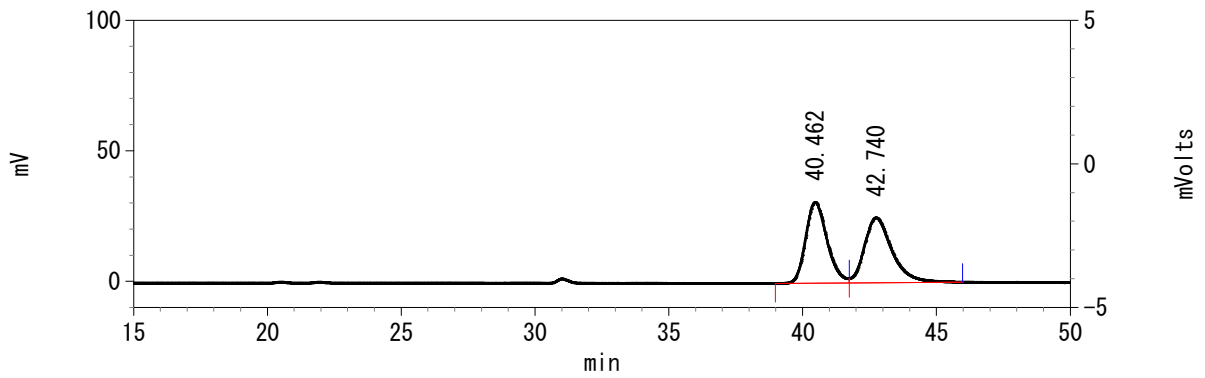

| Pk # | Retention Time | Area    | Area Percent |
|------|----------------|---------|--------------|
| 1    | 40.462         | 1721311 | 49.191       |
| 2    | 42.740         | 1777953 | 50.809       |

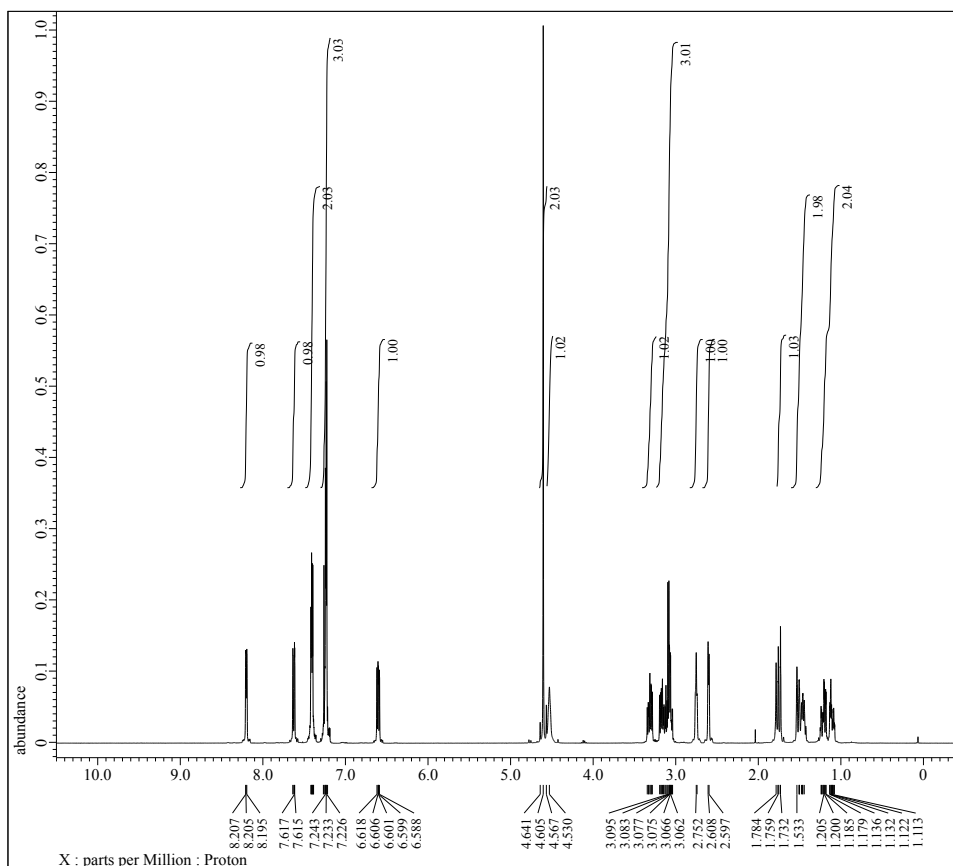

**JEOL**

```

Filename      = 3an proton-1.jdf
Author       = delta
Irr_Freq     = 399.78219838 [MHz]
Experiment   = proton.jxp
Sample_Id    = tn30-6-2
Solvent      = CHLOROFORM-D
Comment      = single_pulse
Data_Format  = 1D_COMPLEX
Dim_Size     = 13107
X_Domain    = Proton
Dim_Units   = [ppm]
Dimensions  = X
Spectrometer = JNM-ECZ400S/L1

Field_Strength = 9.389766 [T] (400 [MHz])
X_Acq_Duration = 2.18628096 [s]
X_Domain      = 1H
X_Freq       = 399.78219838 [MHz]
X_Offset     = 5 [ppm]
X_Points     = 16384
X_Prescans  = 1
X_Resolution = 0.45739775 [Hz]
X_Sweep     = 7.4940048 [kHz]
X_Sweep_Clipped = 5.99520384 [kHz]
Irr_Domain   = Proton
Irr_Offset   = 5 [ppm]
Tri_Domain   = Proton
Tri_Freq     = 399.78219838 [MHz]
Tri_Offset   = 5 [ppm]
Clipped     = FALSE
Scans       = 8
Total_Scans = 8

Relaxation_Delay = 5 [s]
Recvr_Gain      = 46
Temp_Get       = 21 [dC]
X_90_Width    = 6.6 [us]
X_Acq_Time    = 2.18628096 [s]
X_Angle       = 45 [deg]
X_Atn         = 0.9 [dB]
X_Pulse      = 3.3 [us]
Irr_Mode      = Off
Tri_Mode      = Off
Dance_Preset = FALSE
Initial_Wait  = 1 [s]
Repetition_Time = 7.18628096 [s]

```

**3an**

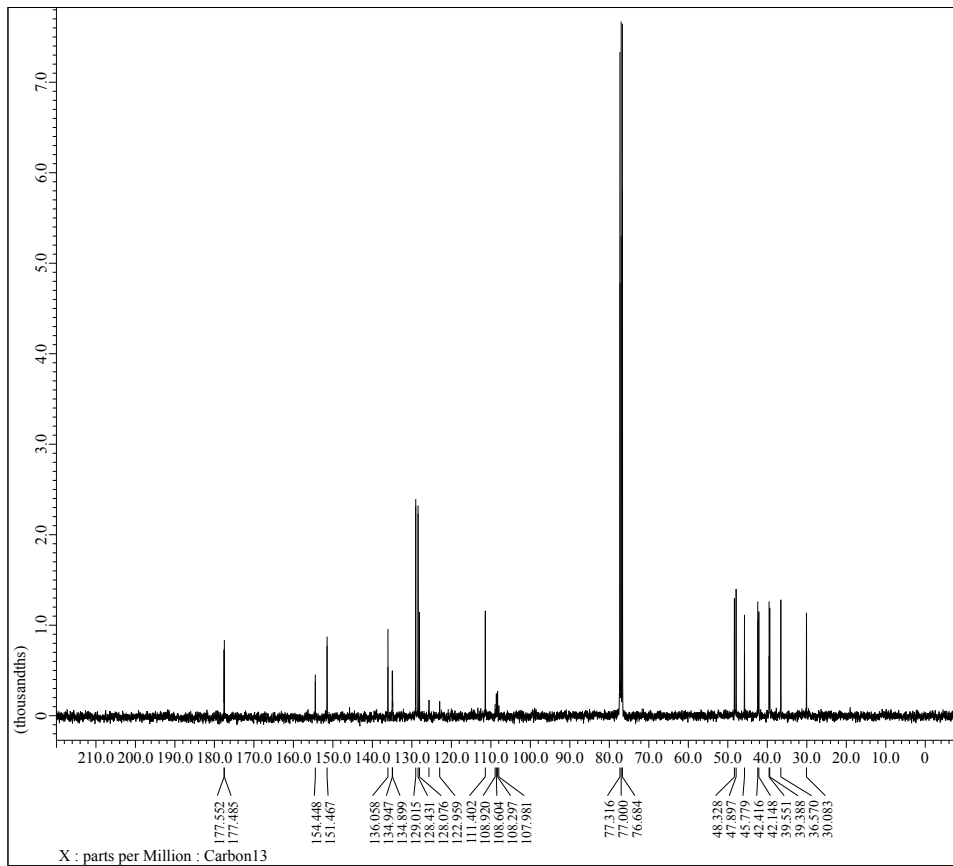

**JEOL**

```

Filename      = 3an carbon-1.jdf
Author       = delta
Irr_Freq     = 399.78219838 [MHz]
Experiment   = carbon.jxp
Sample_Id    = tn30-6-2
Solvent      = CHLOROFORM-D
Comment      = single_pulse_decoupled_gat
Data_Format  = 1D_COMPLEX
Dim_Size     = 26214
X_Domain    = Carbo
Dim_Units   = [ppm]
Dimensions  = X
Spectrometer = JNM-ECZ400S/L1

Field_Strength = 9.389766 [T] (400 [MHz])
X_Acq_Duration = 1.03809024 [s]
X_Domain      = 13C
X_Freq       = 100.52530333 [MHz]
X_Offset     = 100 [ppm]
X_Points     = 32768
X_Prescans  = 4
X_Resolution = 0.96330739 [Hz]
X_Sweep     = 31.56565657 [kHz]
X_Sweep_Clipped = 25.25252525 [kHz]
Irr_Domain   = Proton
Irr_Offset   = 5 [ppm]
Clipped     = FALSE
Scans       = 906
Total_Scans = 906

Relaxation_Delay = 2 [s]
Recvr_Gain      = 50
Temp_Get       = 21.3 [dC]
X_90_Width    = 10.4 [us]
X_Acq_Time    = 1.03809024 [s]
X_Angle       = 30 [deg]
X_Atn         = 3.8 [dB]
X_Pulse      = 3.46666667 [us]
Initial_Wait  = 1 [s]
Repetition_Time = 3.03809024 [s]

```

**3an**

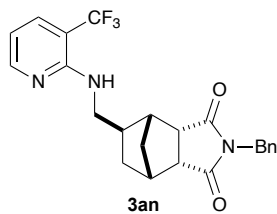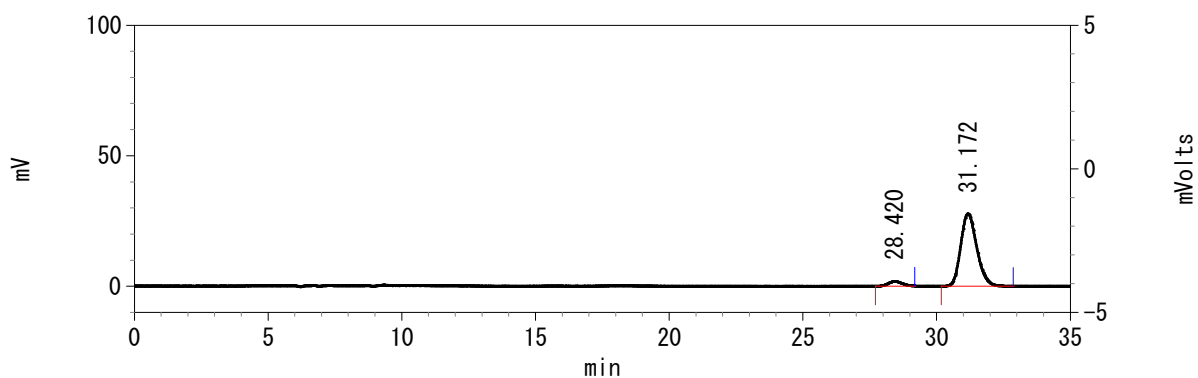

| Pk # | Retention Time | Area    | Area Percent |
|------|----------------|---------|--------------|
| 1    | 28.420         | 65417   | 5.343        |
| 2    | 31.172         | 1158845 | 94.657       |

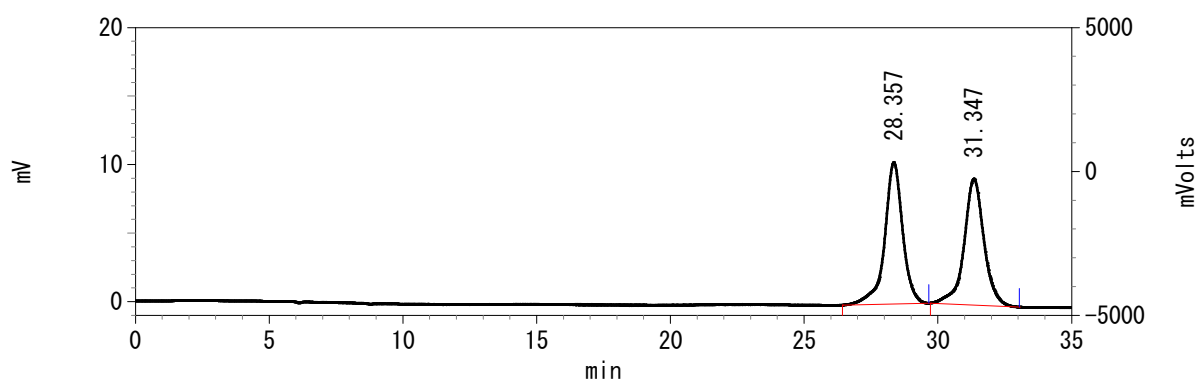

| Pk # | Retention Time | Area   | Area Percent |
|------|----------------|--------|--------------|
| 1    | 28.357         | 485318 | 50.410       |
| 2    | 31.347         | 477421 | 49.590       |

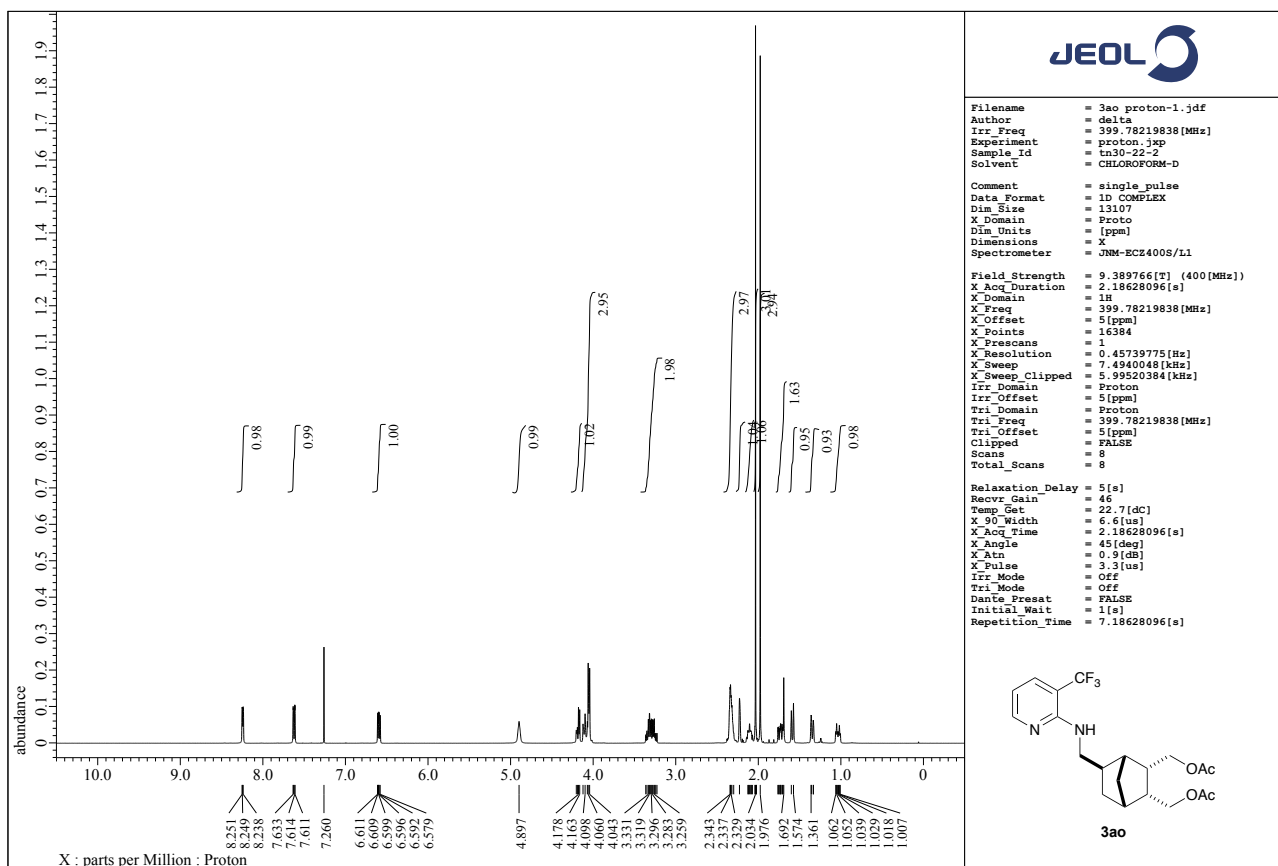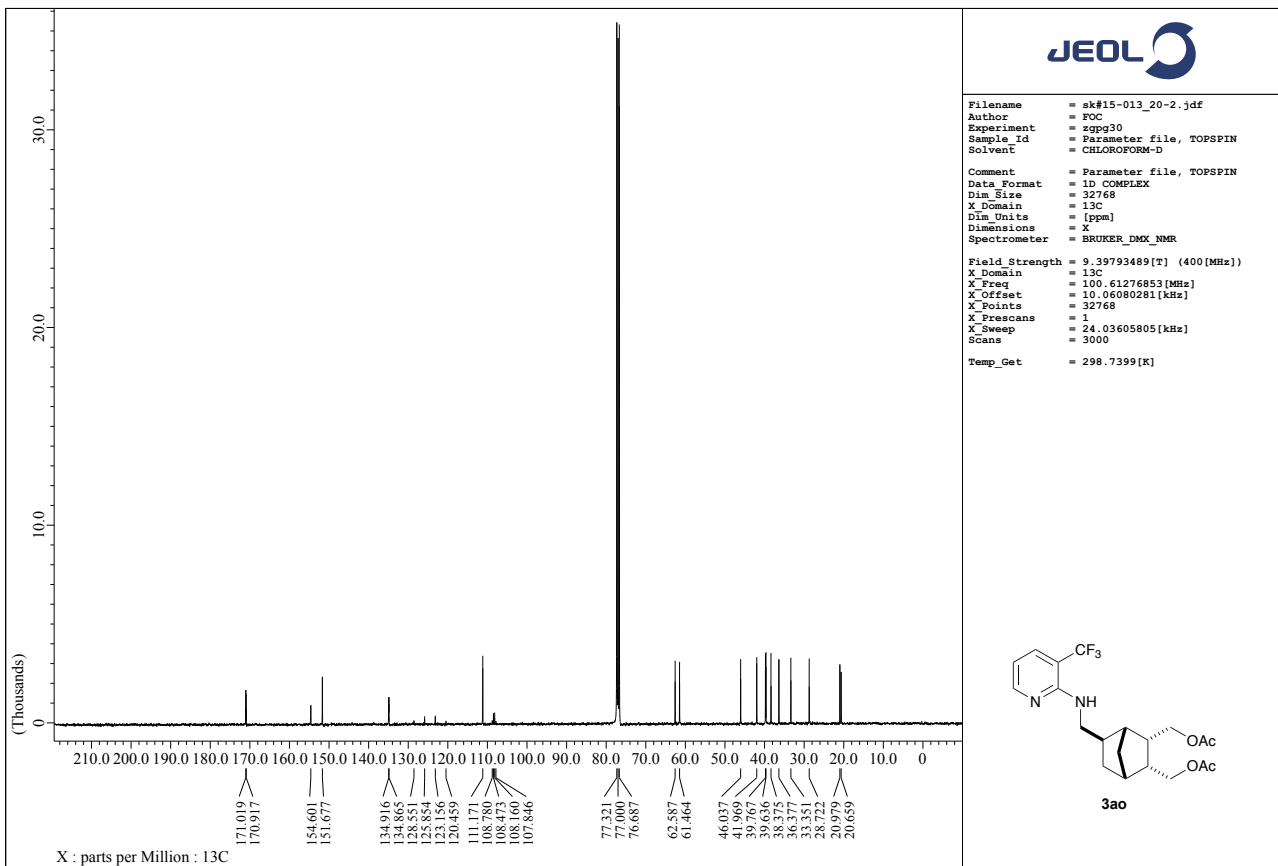

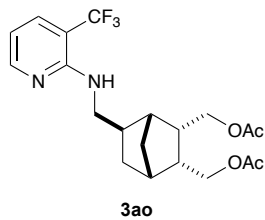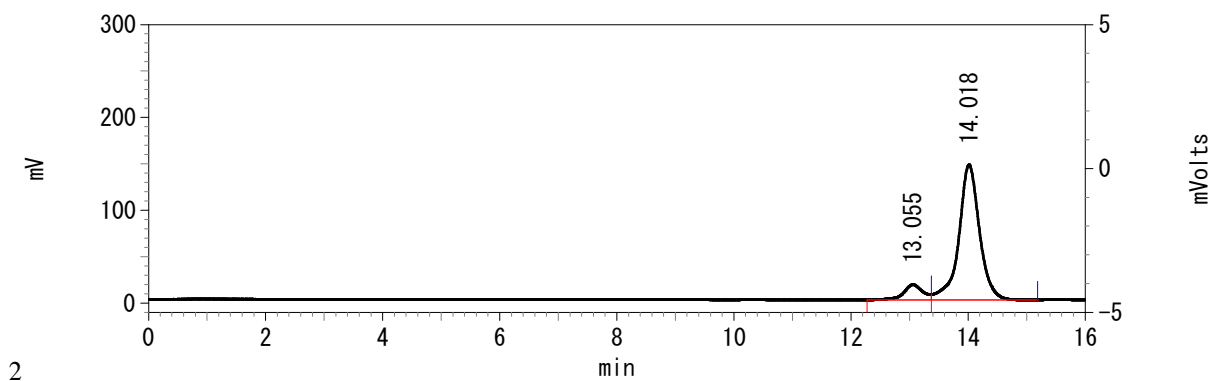

2

| Pk # | Retention Time | Area    | Area Percent |
|------|----------------|---------|--------------|
| 1    | 13.055         | 375946  | 9.532        |
| 2    | 14.018         | 3568092 | 90.468       |

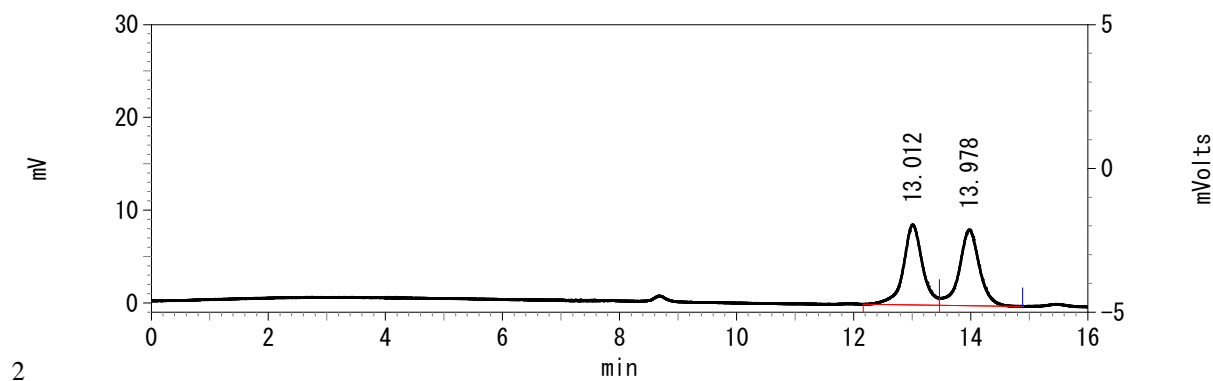

2

| Pk # | Retention Time | Area   | Area Percent |
|------|----------------|--------|--------------|
| 1    | 13.012         | 196266 | 50.023       |
| 2    | 13.978         | 196084 | 49.977       |

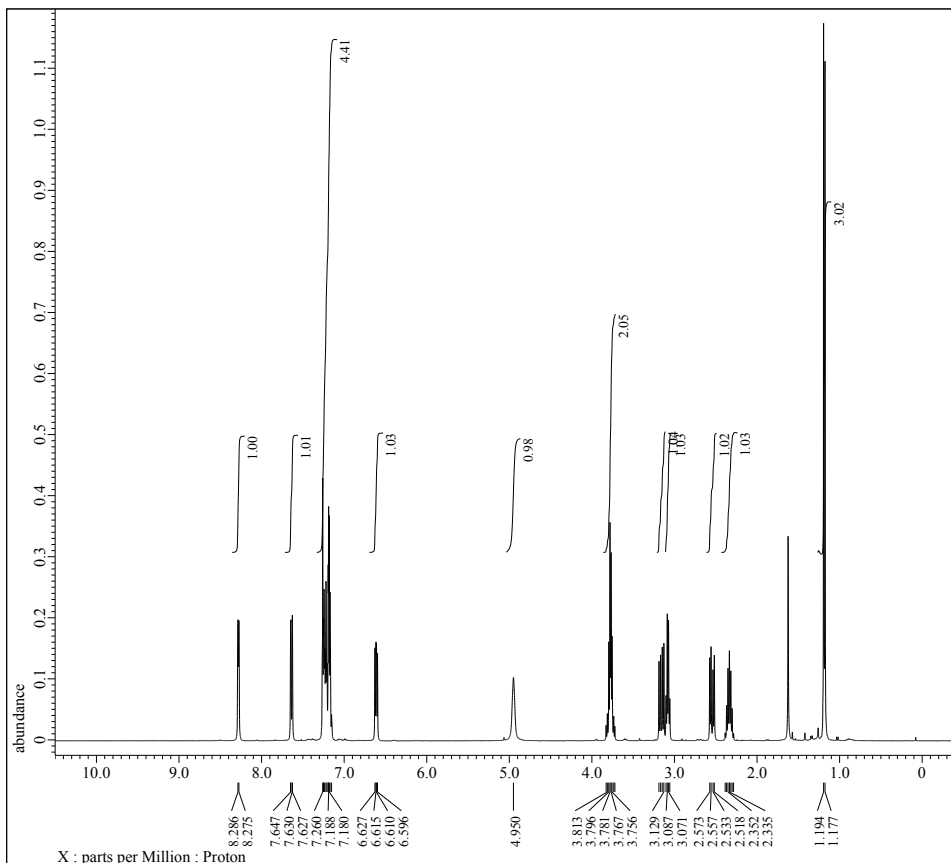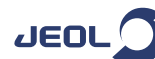

Filename = tn30-59-2\_Proton-2-5.jdf  
 Author = delta  
 Irr\_Freq = 399.78219838 [MHz]  
 Experiment = proton.jxp  
 Sample\_Id = tn30-59-2  
 Solvent = CHLOROFORM-D  
 Comment = single pulse  
 Data\_Format = 1D COMPLEX  
 Dim\_Size = 13107  
 X\_Domain = Proton  
 Dim\_Units = [ppm]  
 Dimensions = X  
 Spectrometer = JNM-ECZ400S/L1  
 Field\_Strength = 9.389766 [T] (400 [MHz])  
 X\_Acq\_Duration = 2.18628096 [s]  
 X\_Domain = 1H  
 X\_Freq = 399.78219838 [MHz]  
 X\_Offset = 5 [ppm]  
 X\_Points = 16384  
 X\_Prescans = 1  
 X\_Resolution = 0.45739775 [Hz]  
 X\_Sweep = 7.4940048 [kHz]  
 X\_Sweep\_Clippped = 5.99520384 [kHz]  
 Irr\_Domain = Proton  
 Irr\_Offset = 5 [ppm]  
 Tri\_Domain = Proton  
 Tri\_Freq = 399.78219838 [MHz]  
 Tri\_Offset = 5 [ppm]  
 Clipped = FALSE  
 Scans = 8  
 Total\_Scans = 8  
 Relaxation\_Delay = 5 [s]  
 Recvr\_Gain = 16  
 Temp\_Get = 20.4 [dc]  
 X\_90\_Width = 6.1 [us]  
 X\_Acq\_Time = 2.18628096 [s]  
 X\_Angle = 45 [deg]  
 X\_Atn = 0.9 [db]  
 X\_Pulse = 3.05 [us]  
 Irr\_Mode = Off  
 Tri\_Mode = Off  
 Danb\_Preset = FALSE  
 Initial\_Wait = 1 [s]  
 Repetition\_Time = 7.18628096 [s]

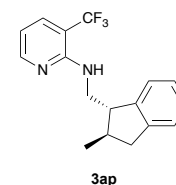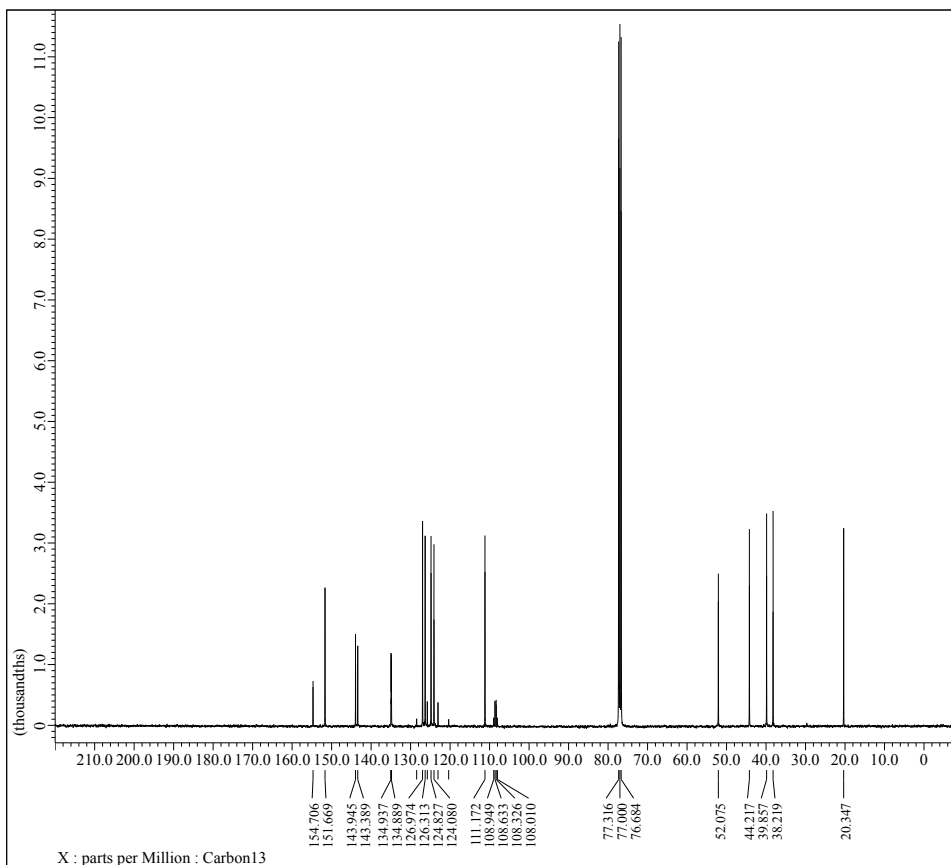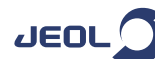

Filename = tn30-59-2\_Carbon-1-4.jdf  
 Author = delta  
 Irr\_Freq = 399.78219838 [MHz]  
 Experiment = carbon.jxp  
 Sample\_Id = tn30-59-2  
 Solvent = CHLOROFORM-D  
 Comment = single pulse decoupled gat  
 Data\_Format = 1D COMPLEX  
 Dim\_Size = 26214  
 X\_Domain = Carbo  
 Dim\_Units = [ppm]  
 Dimensions = X  
 Spectrometer = JNM-ECZ400S/L1  
 Field\_Strength = 9.389766 [T] (400 [MHz])  
 X\_Acq\_Duration = 1.03809024 [s]  
 X\_Domain = 13C  
 X\_Freq = 100.52530333 [MHz]  
 X\_Offset = 100 [ppm]  
 X\_Points = 32768  
 X\_Prescans = 4  
 X\_Resolution = 0.96330739 [Hz]  
 X\_Sweep = 31.56565657 [kHz]  
 X\_Sweep\_Clippped = 25.25252525 [kHz]  
 Irr\_Domain = Proton  
 Irr\_Offset = 5 [ppm]  
 Clipped = FALSE  
 Scans = 8000  
 Total\_Scans = 8000  
 Relaxation\_Delay = 2 [s]  
 Recvr\_Gain = 50  
 Temp\_Get = 20.7 [dc]  
 X\_90\_Width = 10.96 [us]  
 X\_Acq\_Time = 1.03809024 [s]  
 X\_Angle = 30 [deg]  
 X\_Atn = 3.8 [db]  
 X\_Pulse = 3.62 [us]  
 Initial\_Wait = 1 [s]  
 Repetition\_Time = 3.03809024 [s]

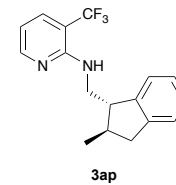



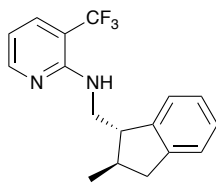

3ap

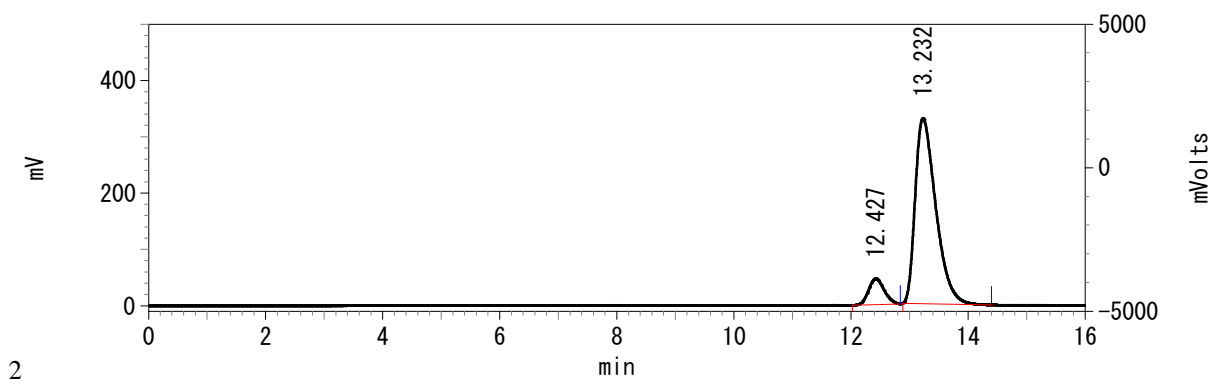

| Pk # | Retention Time | Area    | Area Percent |
|------|----------------|---------|--------------|
| 1    | 12.427         | 854320  | 9.579        |
| 2    | 13.232         | 8064246 | 90.421       |

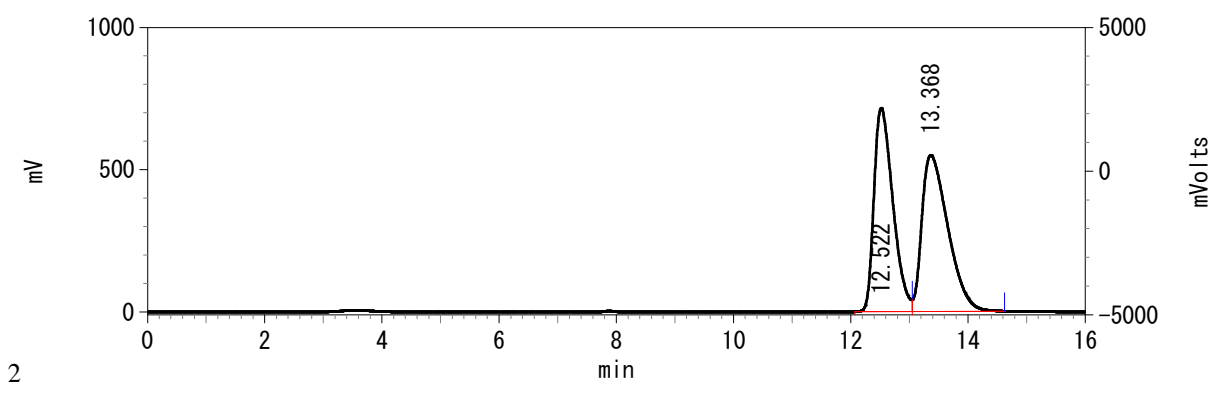

| Pk # | Retention Time | Area     | Area Percent |
|------|----------------|----------|--------------|
| 1    | 12.522         | 16026614 | 48.571       |
| 2    | 13.368         | 16969863 | 51.429       |

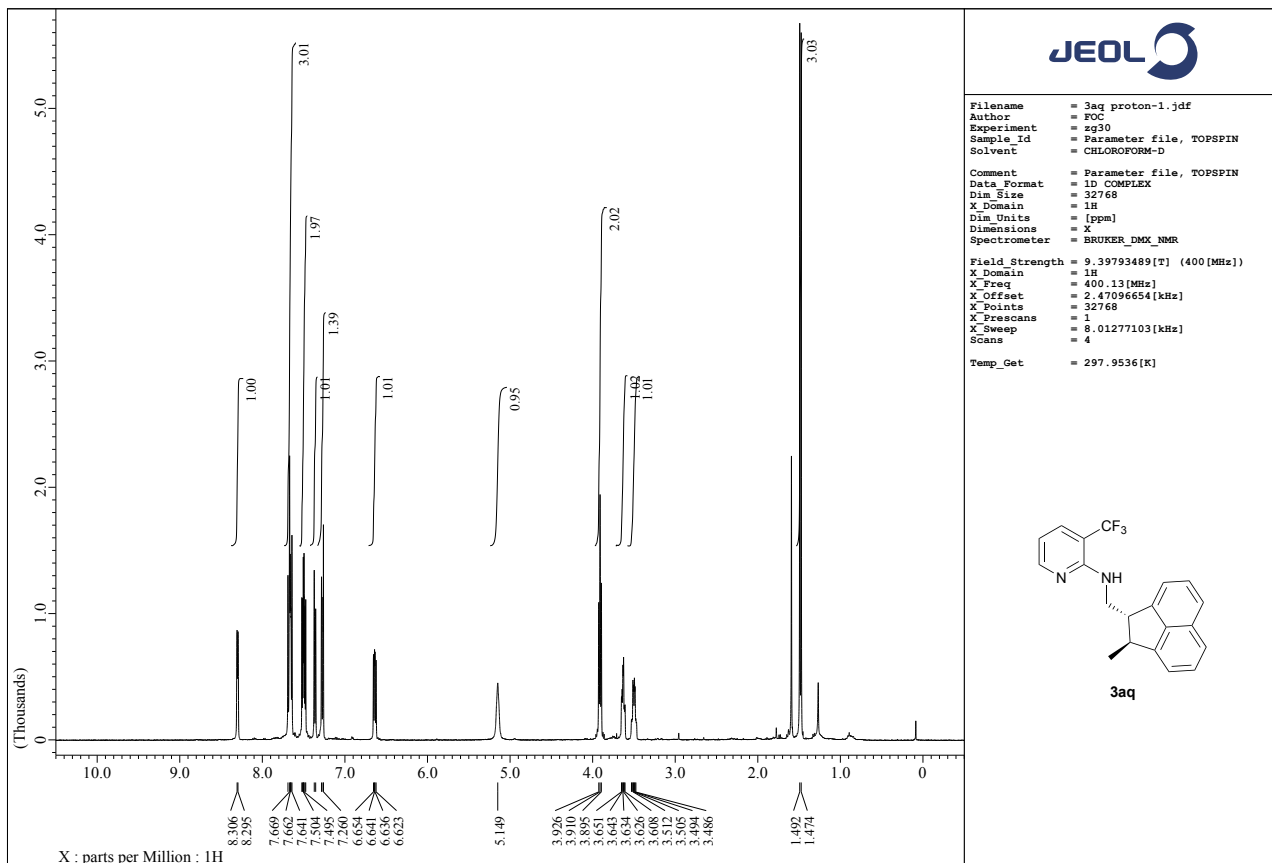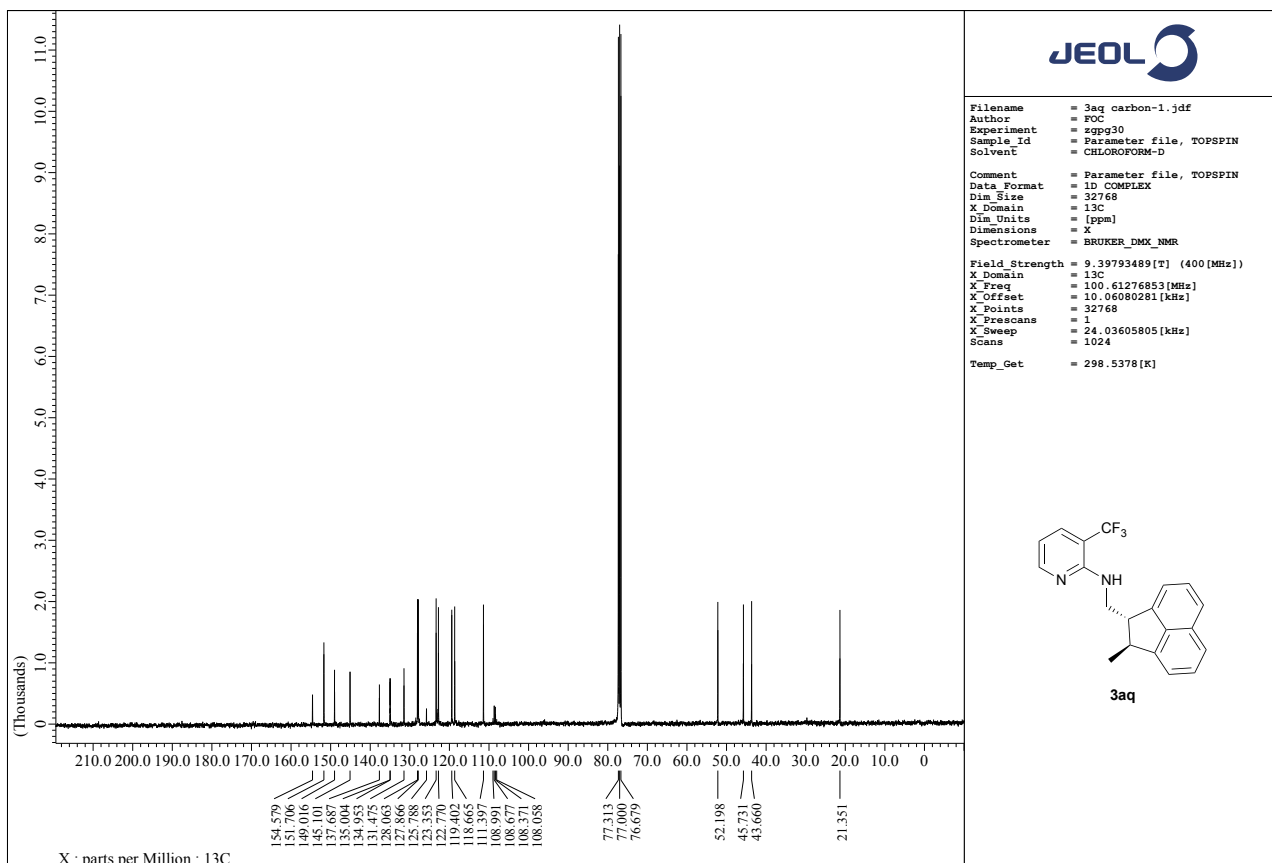

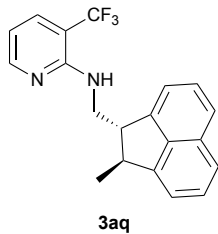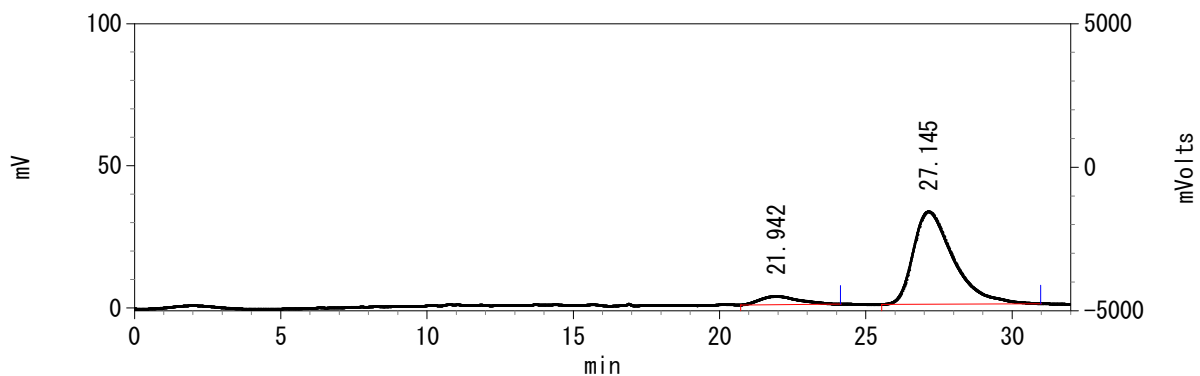

| Pk # | Retention Time | Area    | Area Percent |
|------|----------------|---------|--------------|
| 1    | 21.942         | 262644  | 7.821        |
| 2    | 27.145         | 3095656 | 92.179       |

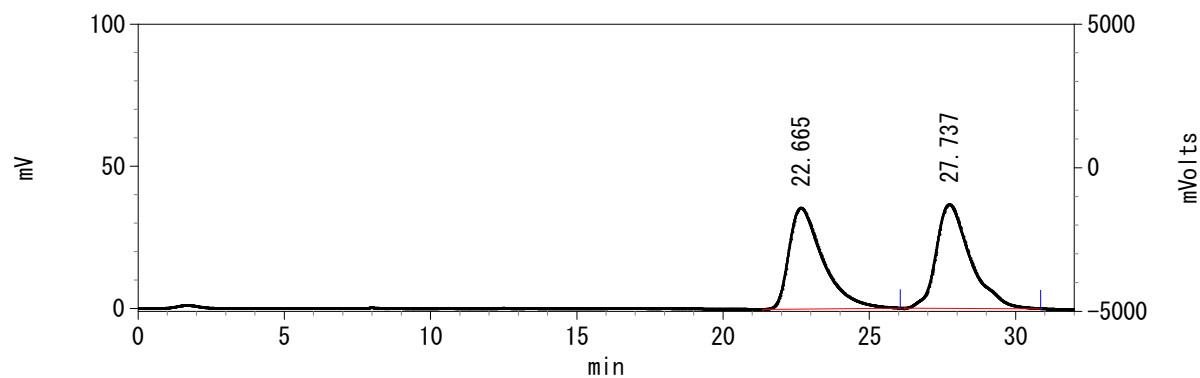

| Pk # | Retention Time | Area    | Area Percent |
|------|----------------|---------|--------------|
| 1    | 22.665         | 2852721 | 49.076       |
| 2    | 27.737         | 2960116 | 50.924       |

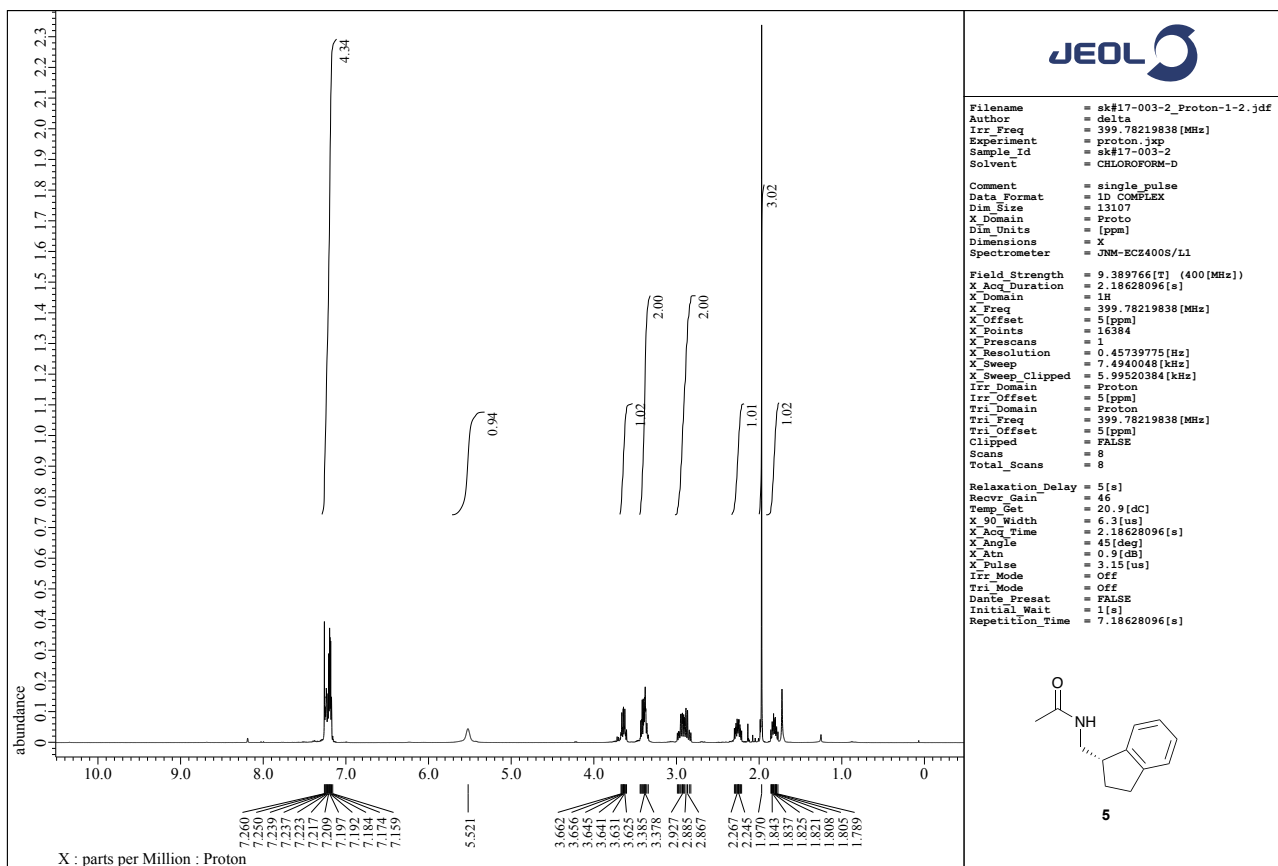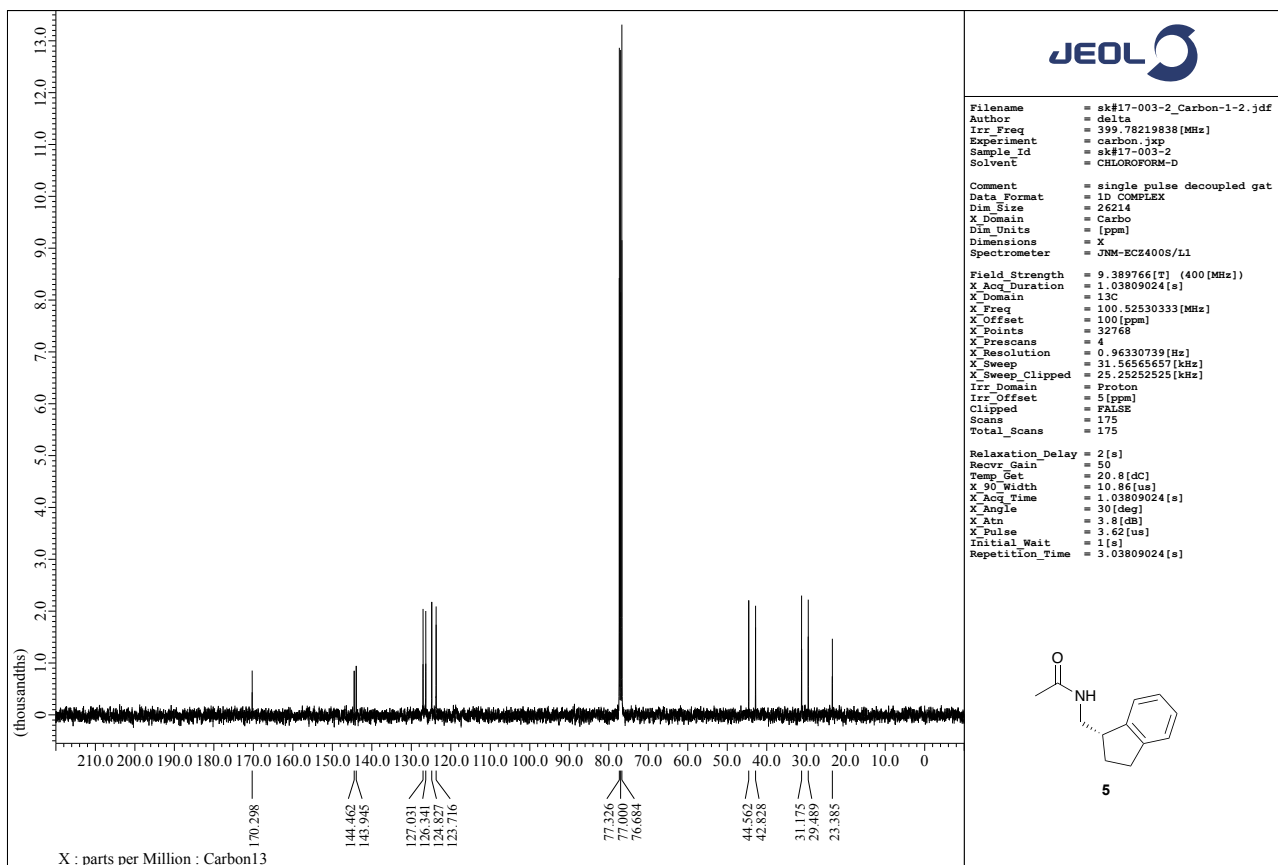

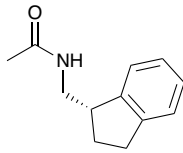

5

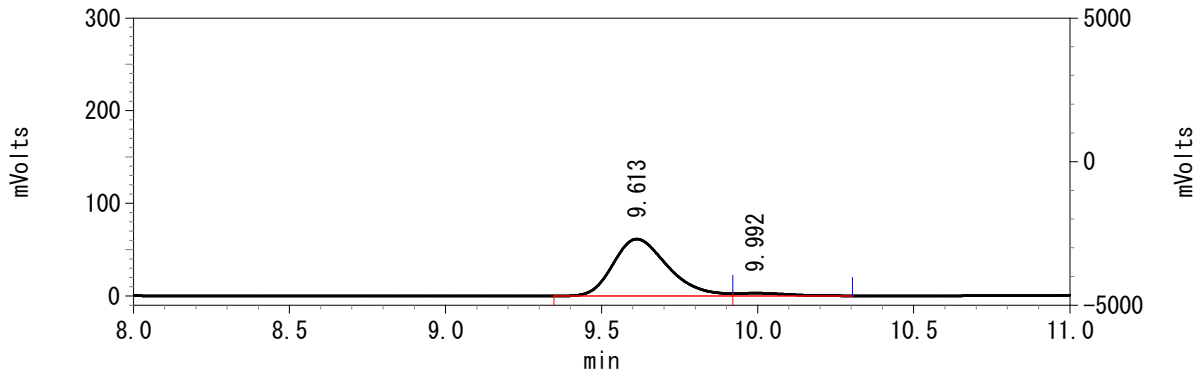

| Pk # | Retention Time | Area   | Area Percent |
|------|----------------|--------|--------------|
| 1    | 9.613          | 748447 | 95.698       |
| 2    | 9.992          | 33644  | 4.302        |

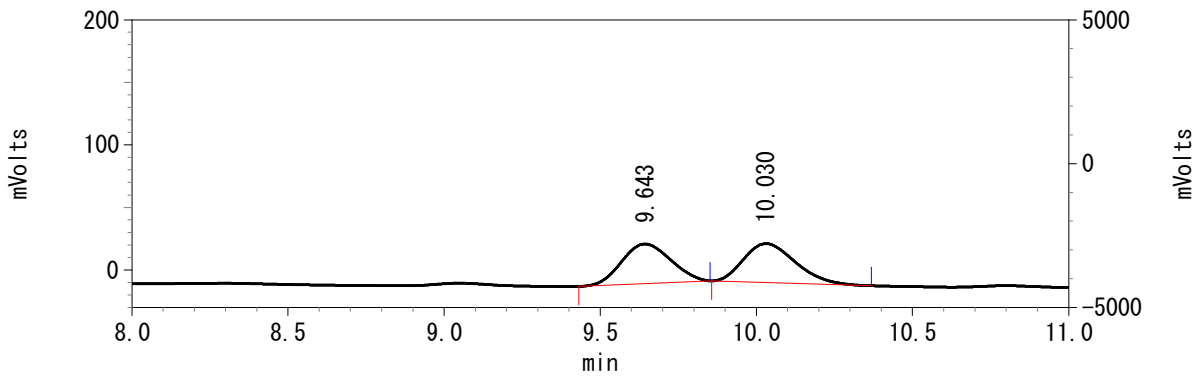

| Pk # | Retention Time | Area   | Area Percent |
|------|----------------|--------|--------------|
| 1    | 9.643          | 345879 | 49.013       |
| 2    | 10.030         | 359816 | 50.987       |

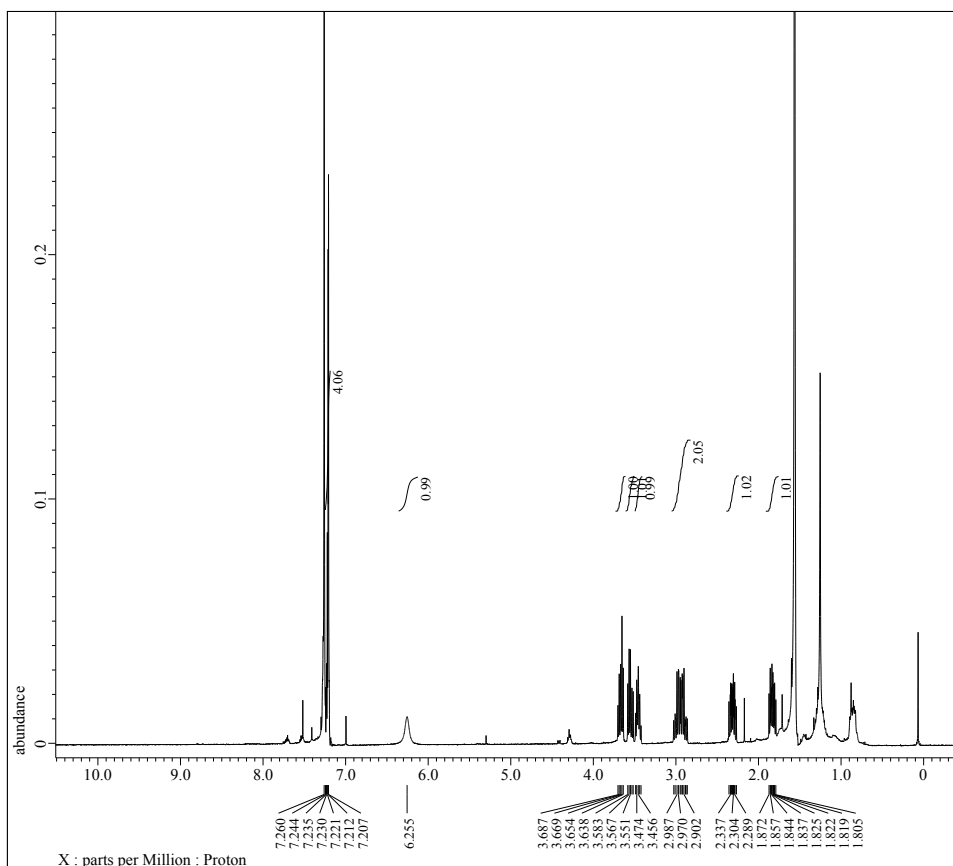

```

Filename      = 6 proton-1.jdf
Author       = delta
Irr_Freq     = 399.78219838 [MHz]
Experiment   = proton_jxp
Sample_Id    = sk#17-tf-gpc-2
Solvent      = CHLOROFORM-D
Comment      = single_pulse
Data Format  = 1D_COMPLEX
Dim_Size     = 13107
X_Domain     = Proto
Dim_Units    = [ppm]
Dimensions   = X
Spectrometer = JNM-ECC400S/L1

Field Strength = 9.389766 [T] (400 [MHz])
X_Acq_Duration = 2.18628096 [s]
X_Domain       = 1H
X_Freq        = 399.78219838 [MHz]
X_Offset      = 5 [ppm]
X_Points      = 16384
X_Prescans    = 1
X_Resolution  = 0.45739775 [Hz]
X_Sweep       = 7.4940048 [kHz]
X_Sweep_Clipped = 5.99520384 [kHz]
Irr_Domain    = Proton
Irr_Offset    = 5 [ppm]
Tri_Domain    = Proton
Tri_Freq     = 399.78219838 [MHz]
Tri_Offset   = 5 [ppm]
Clipped      = FALSE
Scans        = 144
Total Scans  = 144

Relaxation_Delay = 5 [s]
Recvr Gain       = 66
Temp_Get         = 22.6 [dC]
X_90_Width      = 6.3 [us]
X_Acq_Time      = 2.18628096 [s]
X_Angle         = 45 [deg]
X_Atn           = 0.9 [dB]
X_Pulse         = 3.15 [us]
Irr_Mode        = Off
Tri_Mode        = Off
Dante_Presat   = FALSE
Initial_Wait    = 1 [s]
Repetition_Time = 7.18628096 [s]
  
```

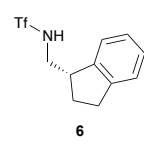

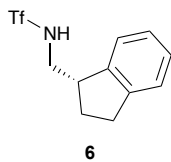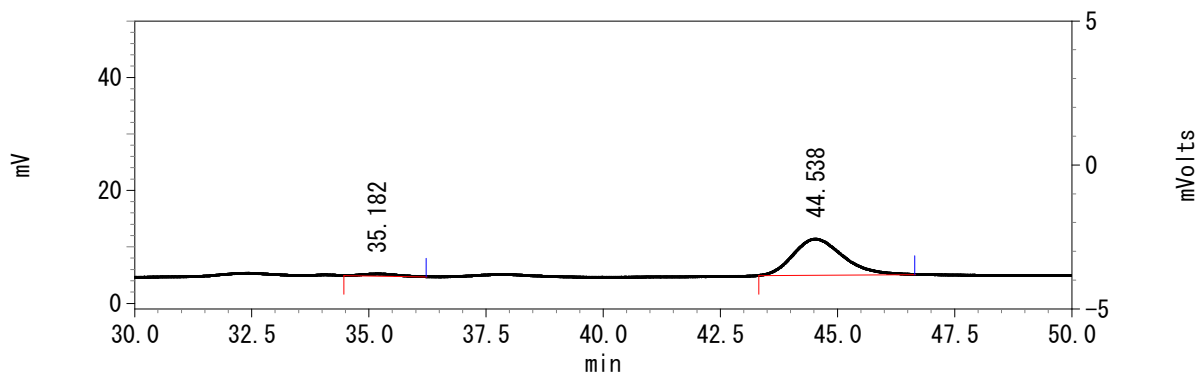

| Pk # | Retention Time | Area   | Area Percent |
|------|----------------|--------|--------------|
| 1    | 35.182         | 19746  | 4.017        |
| 2    | 44.538         | 471830 | 95.983       |

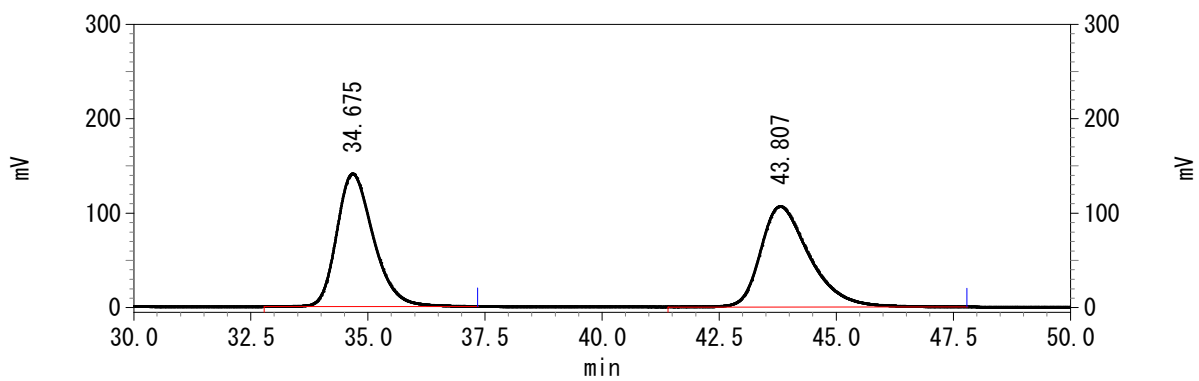

| Pk # | Retention Time | Area    | Area Percent |
|------|----------------|---------|--------------|
| 1    | 34.675         | 7666070 | 49.712       |
| 2    | 43.807         | 7754866 | 50.288       |

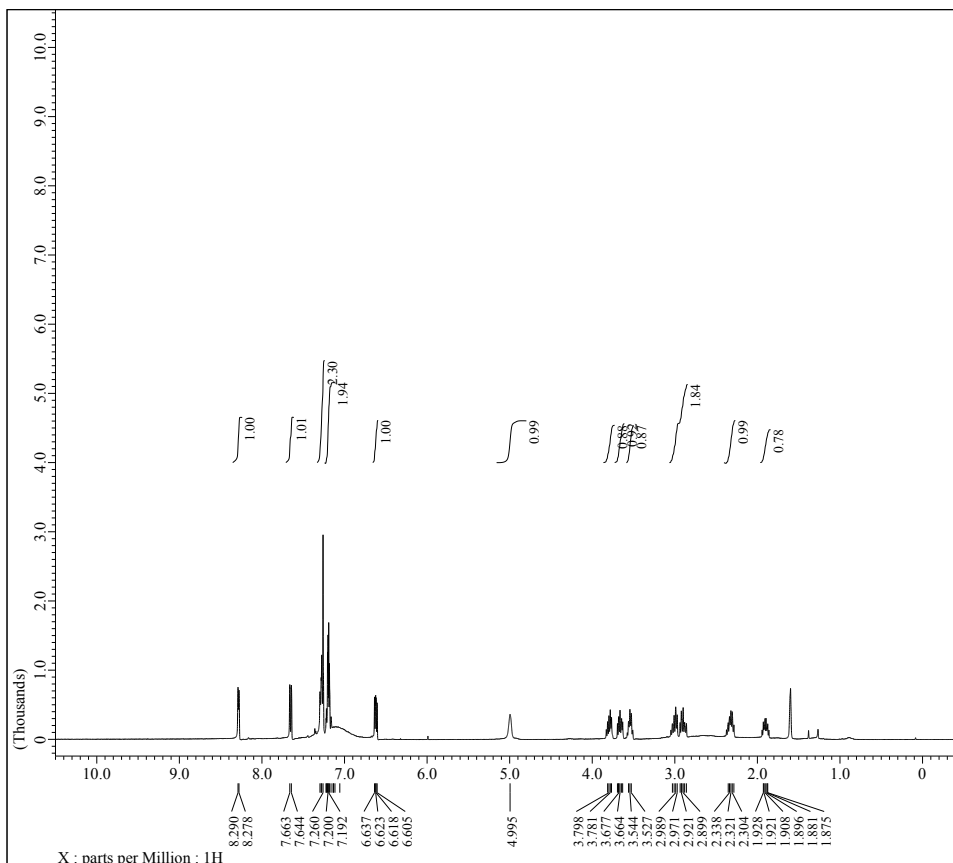

**JEOL**

```

Filename = Scheme 5a_10-2.jdf
Author = ROC
Experiment = kg50
Sample_Id = Parameter file, TOPSPIN
Solvent = CHLOROFORM-D

Comment = Parameter file, TOPSPIN
Data_Format = 1D COMPLEX
Dim_Size = 32768
X_Domain = 1H
Dim_Units = [ppm]
Dimensions = X
Spectrometer = BRUKER DMX NMR

Field_Strength = 9.39793489[T] (400[MHz])
X_Domain = 1H
X_Freq = 400.13[MHz]
X_Offset = 2.47096654[kHz]
X_Points = 32768
X_Prescans = 1
X_Sweep = 8.01277103[kHz]
Scans = 4

Temp_Get = 296.8291[K]

```

**3aa-d**  
(Scheme 5a)

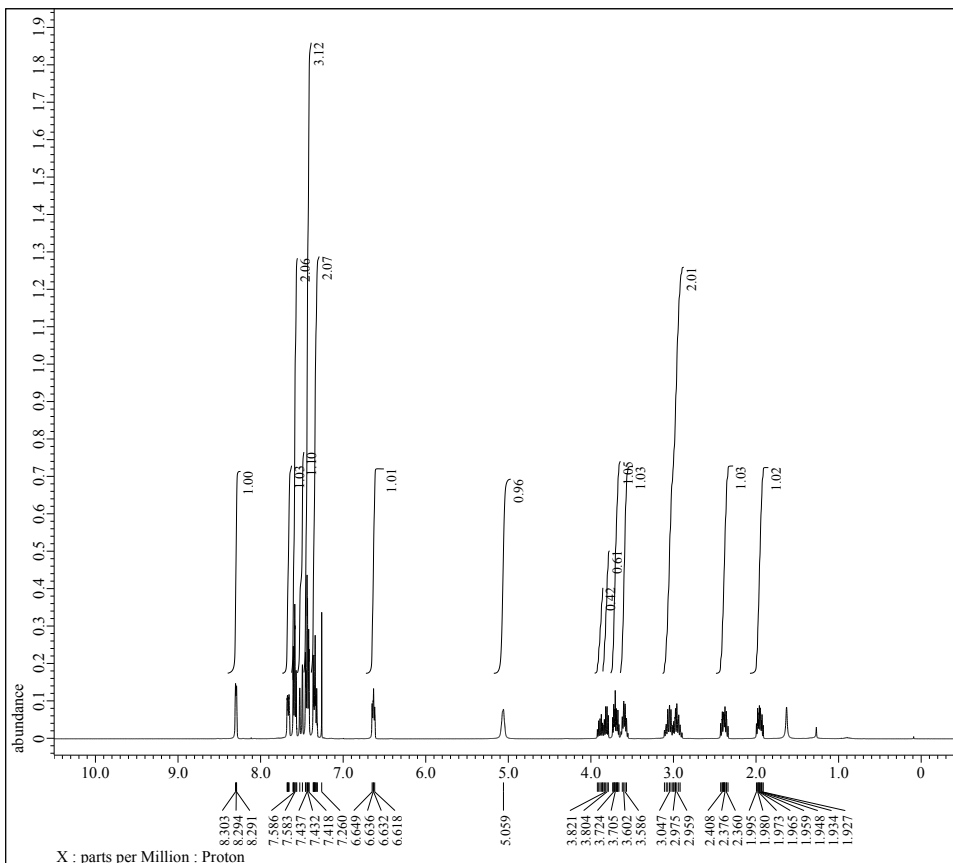

**JEOL**

```

Filename = sk#15-035_Proton-1-10コピー
Author = delta
Irr_Freq = 399.78219838[MHz]
Experiment = proton.jpg
Sample_Id = sk#15-035
Solvent = CHLOROFORM-D

Comment = single_pulse
Data_Format = 1D COMPLEX
Dim_Size = 13107
X_Domain = Proton
Dim_Units = [ppm]
Dimensions = X
Spectrometer = JNM-ECZ400S/L1

Field_Strength = 9.389766[T] (400[MHz])
X_Acq_Duration = 2.18628096[s]
X_Domain = 1H
X_Freq = 399.78219838[MHz]
X_Offset = 5[ppm]
X_Points = 16384
X_Prescans = 1
X_Resolution = 0.45739775[Hz]
X_Sweep = 7.4940048[kHz]
X_Sweep_Clipped = 5.99520384[kHz]
Irr_Domain = Proton
Irr_Offset = 5[ppm]
Tri_Domain = Proton
Tri_Freq = 399.78219838[MHz]
Tri_Offset = 5[ppm]
Clipped = FALSE
Scans = 8
Total_Scans = 8

Relaxation_Delay = 5[s]
Recvr_Gain = 46
Temp_Get = 21[dc]
X_90_Width = 5.89[us]
X_Acq_Time = 2.18628096[s]
X_Angle = 45[deg]
X_Atn = 0.9[db]
X_Pulse = 2.945[us]
Irr_Mode = Off
Tri_Mode = Off
DANTE_Presat = FALSE
Initial_Wait = 1[s]
Repetition_Time = 7.18628096[s]

```

**3ap**  
**3ap'**  
(Scheme 5b)



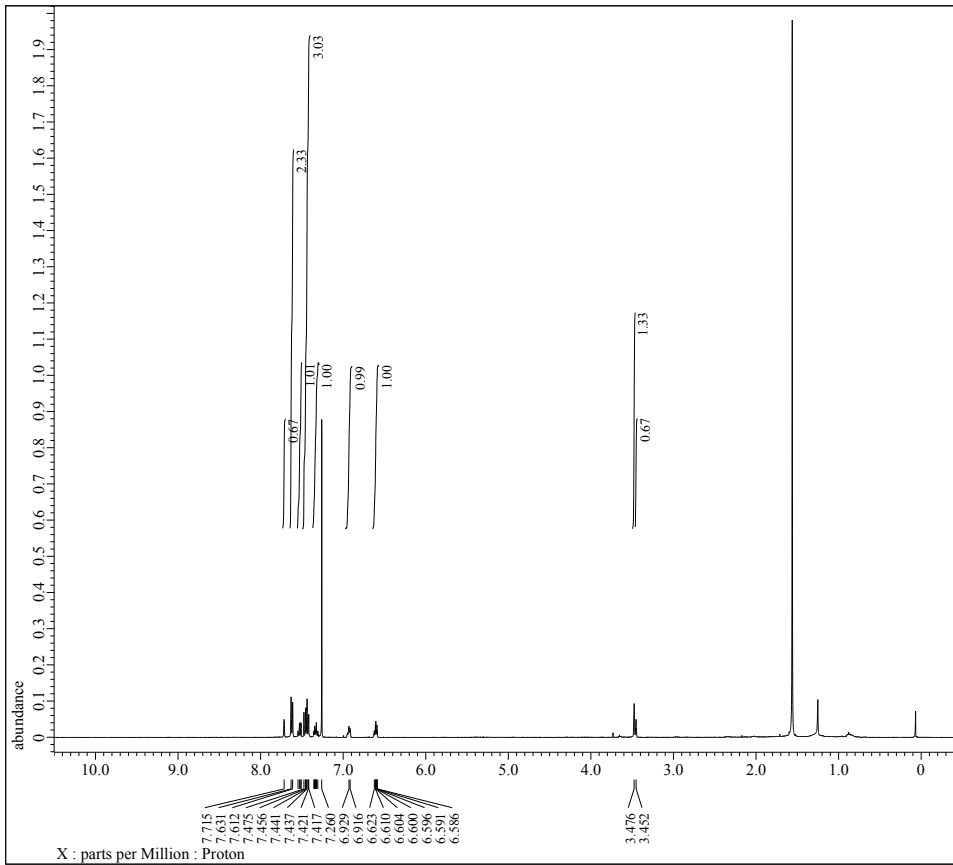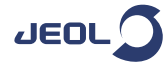

```

Filename      = sk#scheme5c_Proton-1-6.jdf
Author       = delta
Irr Freq     = 399.78219838 [MHz]
Experiment   = proton.jxp
Sample Id    = sk#scheme5c
Solvent      = CHLOROFORM-D
Comment      = single pulse
Data Format   = 1D COMPLEX
Dim Size     = 13107
X Domain     = Proto
Dim Units    = [ppm]
Dimensions   = X
Spectrometer = JNM-EZ400S/L1

Field Strength = 9.389766 [T] (400 [MHz])
X_Acq_Duration = 2.18628096 [s]
X_Domain       = 1H
X_Freq        = 399.78219838 [MHz]
X_Offset      = 5 [ppm]
X Points      = 16384
X_Prescans    = 1
X_Resolution  = 0.45739775 [Hz]
X_Sweep       = 7.4940048 [kHz]
X_Sweep_Clipped = 5.99520384 [kHz]
Irr_Domain    = Proton
Irr_Offset    = 5 [ppm]
Tri_Domain    = Proton
Tri_Freq      = 399.78219838 [MHz]
Tri_Offset    = 5 [ppm]
Clipped       = FALSE
Scans         = 8
Total Scans   = 8

Relaxation_Delay = 5 [s]
Recvr Gain       = 66
Temp_Get         = 21.9 [dC]
X_90_Width      = 6.3 [us]
X_Acq_Time      = 2.18628096 [s]
X_Angle         = 45 [deg]
X_Atn           = 0.9 [dB]
X_Pulse         = 3.15 [us]
Irr_Mode        = Off
Tri_Mode        = Off
Dante_Preset    = FALSE
Initial_Wait    = 1 [s]
Repetition_Time = 7.18628096 [s]
  
```

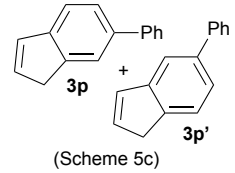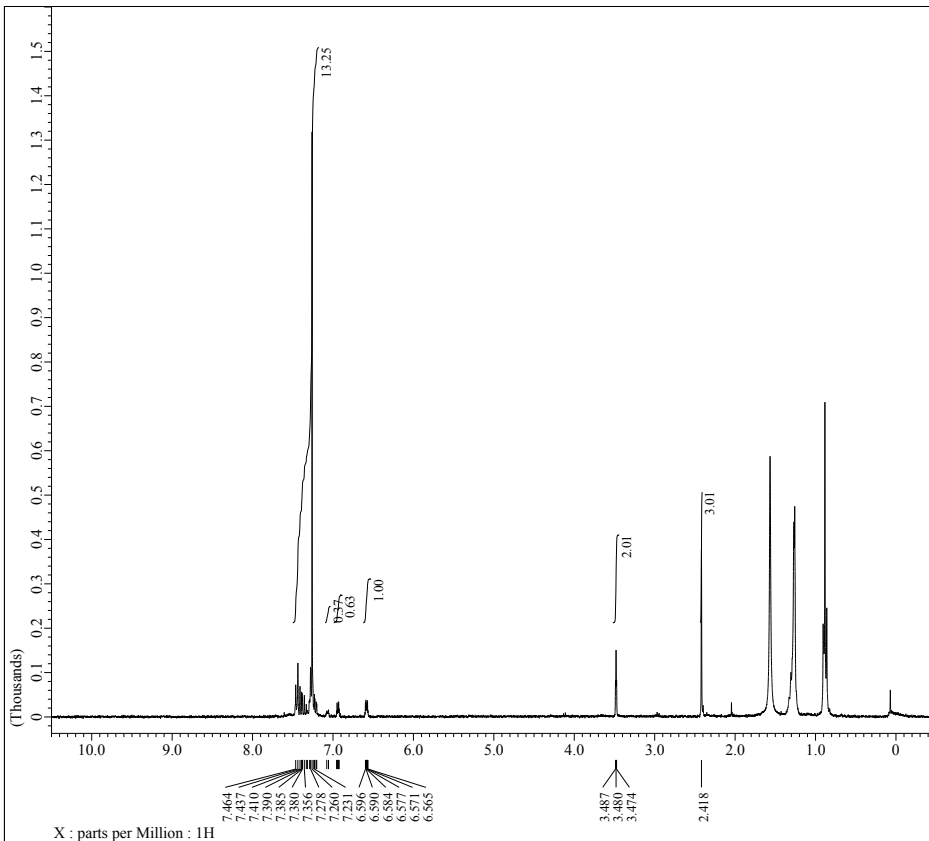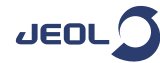

```

Filename      = Scheme 5d_10-4.jdf
Author       = zg30
Experiment   = zg30
Sample Id    = Parameter file, TOPSPIN
Solvent      = CHLOROFORM-D
Comment      = Parameter file, TOPSPIN
Data Format   = 1D COMPLEX
Dim Size     = 32768
X Domain     = 1H
Dim Units    = [ppm]
Dimensions   = X
Spectrometer = BRUKER DMX NMR

Field Strength = 7.0492145 [T] (300 [MHz])
X_Domain       = 1H
X_Freq        = 300.13 [MHz]
X_Offset      = 1.85342561 [kHz]
X Points      = 32768
X_Prescans    = 2
X_Sweep       = 6.1880806 [kHz]
Scans         = 4
Temp_Get      = 294.46 [K]
  
```

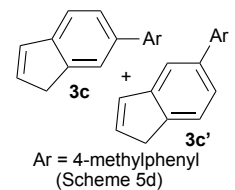

Supplement: d2cc04642c1.pdf [file d2cc04642c1.pdf]
